# Supplementary material for: Towards definitions of critical illness and critical care using concept analysis
Source: PubMed Central journal article supplement — BMJ Open. 2022 Sep 5;12(9):e060972. doi: 10.1136/bmjopen-2022-060972 (PMC9445819; doi:10.1136/bmjopen-2022-060972), 2022-09-05
Supplement: bmjopen-2022-060972.draft_revisions.pdf [file bmjopen-2022-060972.draft_revisions.pdf]

# BMJ Open

BMJ Open is committed to open peer review. As part of this commitment we make the peer review history of every article we publish publicly available.

When an article is published we post the peer reviewers' comments and the authors' responses online. We also post the versions of the paper that were used during peer review. These are the versions that the peer review comments apply to.

The versions of the paper that follow are the versions that were submitted during the peer review process. They are not the versions of record or the final published versions. They should not be cited or distributed as the published version of this manuscript.

BMJ Open is an open access journal and the full, final, typeset and author-corrected version of record of the manuscript is available on our site with no access controls, subscription charges or pay-per-view fees (<http://bmjopen.bmj.com>).

If you have any questions on BMJ Open's open peer review process please email [info.bmjopen@bmj.com](mailto:info.bmjopen@bmj.com)

# BMJ Open

## Towards definitions of critical illness and critical care using concept analysis

|                               |                                                                                                                                                                                                                                                                                                                                                                                                                                                                                                                                                                                                                                                                                                                                                |
|-------------------------------|------------------------------------------------------------------------------------------------------------------------------------------------------------------------------------------------------------------------------------------------------------------------------------------------------------------------------------------------------------------------------------------------------------------------------------------------------------------------------------------------------------------------------------------------------------------------------------------------------------------------------------------------------------------------------------------------------------------------------------------------|
| Journal:                      | <i>BMJ Open</i>                                                                                                                                                                                                                                                                                                                                                                                                                                                                                                                                                                                                                                                                                                                                |
| Manuscript ID                 | bmjopen-2022-060972                                                                                                                                                                                                                                                                                                                                                                                                                                                                                                                                                                                                                                                                                                                            |
| Article Type:                 | Original research                                                                                                                                                                                                                                                                                                                                                                                                                                                                                                                                                                                                                                                                                                                              |
| Date Submitted by the Author: | 12-Jan-2022                                                                                                                                                                                                                                                                                                                                                                                                                                                                                                                                                                                                                                                                                                                                    |
| Complete List of Authors:     | Kayambankadzanja,, Raphael; University of Malawi College of Medicine, Public Health & Family Medicine; Queen Elizabeth Central Hospital, Anaesthesia and Intensive Care<br>Schell, Carl; Karolinska Institute, Global Public Health; Uppsala Universitet, Centre for Clinical Research Sörmland<br>Gerdin Wärnberg, Martin ; Karolinska Institutet, Department of Public Health Sciences<br>Tamras, Thomas; Södertälje Hospital<br>Mollazadegan, Hedi; Sankt Goran Hospital, The Department of Addiction Medicine<br>Holmberg, Mats; Region Sormland, Department of Ambulance Service<br>Alvesson, Helle; Karolinska Institutet, Department of Public Health Sciences<br>Baker, Tim; Karolinska Institutet, Department of Global Public Health |
| Keywords:                     | Adult intensive & critical care < ANAESTHETICS, ACCIDENT & EMERGENCY MEDICINE, HEALTH SERVICES ADMINISTRATION & MANAGEMENT                                                                                                                                                                                                                                                                                                                                                                                                                                                                                                                                                                                                                     |
|                               |                                                                                                                                                                                                                                                                                                                                                                                                                                                                                                                                                                                                                                                                                                                                                |

SCHOLARONE™  
Manuscripts

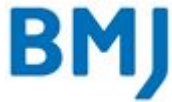

I, the Submitting Author has the right to grant and does grant on behalf of all authors of the Work (as defined in the below author licence), an exclusive licence and/or a non-exclusive licence for contributions from authors who are: i) UK Crown employees; ii) where BMJ has agreed a CC-BY licence shall apply, and/or iii) in accordance with the terms applicable for US Federal Government officers or employees acting as part of their official duties; on a worldwide, perpetual, irrevocable, royalty-free basis to BMJ Publishing Group Ltd ("BMJ") its licensees and where the relevant Journal is co-owned by BMJ to the co-owners of the Journal, to publish the Work in this journal and any other BMJ products and to exploit all rights, as set out in our [licence](#).

The Submitting Author accepts and understands that any supply made under these terms is made by BMJ to the Submitting Author unless you are acting as an employee on behalf of your employer or a postgraduate student of an affiliated institution which is paying any applicable article publishing charge ("APC") for Open Access articles. Where the Submitting Author wishes to make the Work available on an Open Access basis (and intends to pay the relevant APC), the terms of reuse of such Open Access shall be governed by a Creative Commons licence – details of these licences and which [Creative Commons](#) licence will apply to this Work are set out in our licence referred to above.

Other than as permitted in any relevant BMJ Author's Self Archiving Policies, I confirm this Work has not been accepted for publication elsewhere, is not being considered for publication elsewhere and does not duplicate material already published. I confirm all authors consent to publication of this Work and authorise the granting of this licence.

# 1 Towards definitions of critical illness and critical care using concept analysis

2 Raphael Kazidule Kayambankadzanja<sup>1,2</sup>, Carl Otto Schell<sup>3,4,5</sup>, Martin Gerdin Wärnberg<sup>3,6</sup>,  
3 Thomas Tamras<sup>7</sup>, Hedi Mollazadegan<sup>8</sup>, Mats Holmberg<sup>9,10,11</sup>, Helle Mølsted Alvesson<sup>3</sup>, Tim  
4 Baker<sup>3,12,13</sup>

- 5 1. Department of Anaesthesia and Intensive Care, Queen Elizabeth Central Hospital, Blantyre Malawi
- 6 2. Department of Public Health, Kamuzu University of Health Sciences
- 7 3. Department of Global Public Health, Karolinska Institutet, Stockholm, Sweden
- 8 4. Centre for Clinical Research Sörmland, Uppsala University, Eskilstuna, Sweden
- 9 5. Department of Medicine, Nyköping Hospital, Nyköping, Sweden.
- 10 6. Function Perioperative Medicine and Intensive Care, Karolinska University Hospital, Solna, Sweden
- 11 7. Södertälje Hospital, Stockholm, Sweden
- 12 8. The Department of Addiction Medicine, Sankt Goran Hospital, Stockholm, Swede
- 13 9. Faculty of Health and Life Sciences, Linnaeus University, Växjö, Sweden
- 14 10. School of Health, Care and Social Welfare, Mälardalen University, Eskilstuna, Sweden
- 15 11. Centre for Clinical Research Sörmland, Uppsala University, Eskilstuna, Sweden
- 16 12. Department of Clinical Research, London School of Hygiene & Tropical Medicine, London, UK
- 17 13. Department of Emergency Medicine, Muhimbili University of Health and Allied Sciences, Dar es Salaam, Tanzania

18  
19 Corresponding Author: Raphael Kazidule Kayambankadzanja Email: raphkazidule@gmail.com

## 20 Abstract

### 21 Objective

22 As “critical illness” and “critical care” lack consensus definitions, this study aims to explore how  
23 the concepts’ are used, describe their defining attributes and propose potential definitions.

### 24 Design

25 We used the Walker and Avant stepwise approach to concept analysis. The uses and definitions of  
26 the concepts were identified through a scoping review of the literature and an online survey of 114  
27 global clinical experts. Through content analysis of the data we extracted codes, categories and  
28 themes to determine the concepts’ defining attributes and we proposed potential definitions. To  
29 assist understanding, we present model, related and contrary cases concerning the concepts, we  
30 identified antecedents and consequences to the concepts, and defined empirical referents.

### 31 Results

1  
2  
3 32 The defining attributes of critical illness were a high risk of imminent death; vital organ  
4 33 dysfunction; requirement for care to avoid death; and potential reversibility. The defining attributes  
5 34 of critical care were the identification, monitoring and treatment of critical illness; vital organ  
6 35 support; initial and sustained care; any care of critical illness; and specialized human and physical  
7 36 resources. Our proposed definition of critical illness is, “*a state of ill health with vital organ*  
8 37 *dysfunction, a high risk of imminent death if care is not provided and the potential for*  
9 38 *reversibility*”. Our proposed definition of critical care is, “*the identification, monitoring and*  
10 39 *treatment of patients with critical illness through the initial and sustained support of vital organ*  
11 40 *functions.*”

## 19 41 **Conclusion**

20 42 The concepts critical illness and critical care lack consensus definitions and have varied uses.  
21 43 Through concept analysis of uses and definitions in the literature and among experts we have  
22 44 identified the defining attributes of the concepts and propose definitions that could aid clinical  
23 45 practice, research, and policy making.  
24  
25  
26  
27  
28  
29  
30

## 31 47 **Strengths and Limitations of the Study**

- 32  
33 48 • This concept analysis is the first study to systematically describe the uses and definitions of the  
34 49 concepts *critical illness* and *critical care*  
35  
36 50 • The study uses a scoping review of the literature and input from over one hundred clinical  
37 51 experts from diverse settings globally to identify the defining attributes and provide  
38 52 proposed definitions of the concepts  
39  
40 53 • Some uses and definitions of the concepts in languages other than English, in unpublished  
41 54 grey literature and from clinical experts not included in the study may have been missed  
42  
43 55 • As current usage of the concepts is diverse, the proposed definitions may not be universally  
44 56 accepted and are aimed to stimulate further discussion  
45  
46  
47  
48  
49  
50  
51

## 52 58 **Introduction**

53  
54  
55  
56  
57  
58  
59  
60

1  
2  
3 59 The concepts *critical illness* and *critical care* are commonly used in healthcare. In PubMed, both  
4  
5 60 are Medical Subject Headings (MeSH) terms, and searches for “critical illness” or “critical care”  
6  
7 61 return 40,000 and 220,000 articles respectively. While it may seem evident that the concepts  
8  
9 62 concern patients with very serious illness and their care, there is a lack of consensus around their  
10  
11 63 precise definitions.

12  
13 64 This causes problems for clinical practice, research, and policy making. For the clinician,  
14  
15 65 discordant interpretations of when a patient is critically ill can lead to differing clinical assessments  
16  
17 66 and treatments despite similar states: when should a patient be regarded as critically ill so that an  
18  
19 67 alarm should be triggered and when is admission to an intensive care unit warranted? For the  
20  
21 68 researcher, it can be difficult to design a study or interpret findings: studying the effect of a  
22  
23 69 treatment for critical illness requires clear eligibility criteria and translating the findings to another  
24  
25 70 patient group requires that the groups have similar clinical conditions. For the policy maker,  
26  
27 71 prioritising programmes and investments designed to improve care for very sick patients relies on  
28  
29 72 comparisons between similar groups and clearly defined interventions.

30  
31 73 Even quantifying the total global burden of critical illness has been challenging due to the lack of  
32  
33 74 an agreed definition. Proxies have been used instead, for example summing up syndromes  
34  
35 75 considered to comprise critical illness such as sepsis and acute lung injury– resulting in estimates  
36  
37 76 of up to 45 million critical illness cases each year.(1) Low- and middle-income countries are  
38  
39 77 suspected to have the highest burden (2), but the lack of a definition has hampered comparisons  
40  
41 78 across settings.

42  
43 79 Studying the care for critically ill patients has also been problematic. Studies have focused on care  
44  
45 80 provided in hospital locations such as in intensive care or emergency units, which exclude care  
46  
47 81 provided in hospitals lacking such units, and to critically ill patients in general hospital wards. (3–  
48  
49 82 5) In the COVID-19 pandemic, there have been great efforts to describe, scale-up and improve  
50  
51 83 care for critically ill patients throughout the world (3,5) and a lack of agreement around critical  
52  
53 84 care has hampered these efforts.

54  
55 85 These examples illustrate how important concepts are as the building blocks of theories and  
56  
57 86 communication. Ideally, concepts are clearly defined and their use well described for unambiguous  
58  
59 87 communication and an understanding about exactly what is being described or explained. (6)  
60  
61 88 *Concept analysis* is a method for investigating how concepts are used and understood. Concept

1  
2  
3 89 analyses have been conducted in diverse fields such as in teamwork (7), postoperative recovery(8)  
4 90 and bioterrorism preparedness(9), all with the aim of providing basic conceptual understanding  
5 91 and facilitating communication. In this paper, we have used concept analysis, following the  
6 92 stepwise approach described by Walker and Avant(6). The first two steps in the approach are to  
7 93 choose the concept and determine the aim of the analysis. Our chosen concepts are *critical illness*  
8 94 and *critical care* and our aims are to explore the uses and definitions of the concepts in published  
9 95 sources and by global clinical experts, leading to a description of the defining attributes of the  
10 96 concepts and to proposed definitions.

## 17 97 **Methods**

18 98 The Walker & Avant approach to concept analysis uses the following steps: identifying the uses  
19 99 of the concept; determining the concept's defining attributes; presenting a model case, identifying  
20 100 related and contrary cases; identifying antecedents and consequences; and defining empirical  
21 101 referents.(6)

### 27 102 **Identifying the uses of the concept**

28 103 We identified the uses of the concepts of critical illness and critical care through a scoping review  
29 104 of the literature and a web-based survey of global experts.

### 33 105 ***Scoping Review***

34 106 We used the Arksey and O'Malley framework for scoping reviews(10). Relevant studies in English  
35 107 were identified in the PubMed and Web of Science databases. To include publications that were  
36 108 not found through the database searches, hand-searching of publication lists of intensive care  
37 109 medicine, and emergency medicine societies was performed. Duplicates were removed using the  
38 110 online software program Rayyan(11). The publications were examined through title, then abstract  
39 111 review and lastly by full-text review.

### 45 112 ***Critical Illness***

46 113 The search terms used were terminolog\*, etymolog\*, nomenclatur\*, definition\*, plus emergency,  
47 114 critical\*, acute\*, sever\*, ill, illness. A total of 9323 articles were identified using these critical  
48 115 illness terms in the databases and an additional two articles were identified through hand-  
49 116 searching. Of these, 1126 articles were identified as duplicates and the remaining 8199 articles  
50 117 were screened by title and abstract review by two of the authors (TT and HM). 8168 articles were

1  
2  
3 118 excluded as they did not concern critical illness, were not written in English or were not available  
4  
5 119 in full text online, leaving 31 articles for inclusion for full-text review. In the full-text review, 22  
6  
7 120 articles were excluded as they did not define critical illness, and so nine articles were included in  
8  
9 121 the analysis (Supplementary Table 1).

### 10 11 122 *Critical Care*

12  
13 123 The search terms used were terminolog\*, etymolog\*, nomenclatur\*, definition\*, plus critical care,  
14  
15 124 intensive care, emergency care, acute care. A total of 7286 articles were identified using these  
16  
17 125 critical care terms in the databases and an additional six articles were identified through hand-  
18  
19 126 searching. Of these, 1964 were identified as duplicates and the remaining 5322 articles were  
20  
21 127 screened by title and abstract review by two of the authors (TT and HM). 5269 articles were  
22  
23 128 excluded as they were not concerning critical illness, not written in English or not available in full  
24  
25 129 text online, leaving 59 articles for inclusion for full-text review. In the full-text review, 46 articles  
26  
27 130 were excluded as they did not define critical care and so 13 articles were included in the analysis  
28  
29 131 (Supplementary Table 2).

### 30 31 132 *Expert survey*

32  
33 133 The survey used open-ended questions to gather information about the experts' definitions of  
34  
35 134 critical illness and critical care, and how they see the relationship of the concepts to connected  
36  
37 135 concepts in order to provide context. The survey included the questions: i. *How would you define*  
38  
39 136 *critical illness?*, ii. *How would you define critical care?*, iii. *Do critical care and intensive care*  
40  
41 137 *differ? If yes, in what way?* iv. *Do critical care and emergency care differ and if yes, in what way?*  
42  
43 138 v. *Do critical care and acute care differ and if yes, in what way?*

44  
45 139 The inclusion criterion for an expert to be invited to participate in the survey was experience in  
46  
47 140 any medical specialty that includes care of patients with acute, severe illness. Experts were  
48  
49 141 identified from a stakeholder mapping of global critical care done by one of the authors (TB,  
50  
51 142 unpublished), and those known to the researchers to be global experts in the field of critical care.  
52  
53 143 Purposive sampling was used to invite experts with the aim of including 100 experts with a balance  
54  
55 144 between specialties, geographical locations, health worker cadres and gender. In total 146 experts  
56  
57 145 were invited to take part, and 113 completed the survey (77% response rate) (Table 1).

### 58 59 146 **Table 1: Characteristics of the experts who participated in the survey**



| Variable                   | Frequency (%) |
|----------------------------|---------------|
| All                        | 114           |
| Gender                     |               |
| Male                       | 80 (70.2)     |
| Female                     | 34 (29.8)     |
| Continent                  |               |
| Africa                     | 42 (36.8)     |
| Europe                     | 29 (25.4)     |
| North America              | 26 (22.8)     |
| Asia                       | 12 (10.5)     |
| South America              | 3 (2.6)       |
| Australia                  | 2 (1.8)       |
| Cadres*                    |               |
| Physician                  | 93 (53.1)     |
| Researcher                 | 62 (35.4)     |
| Nurse                      | 12 (6.9)      |
| Policy Maker               | 5 (2.9)       |
| Other                      | 3 (1.7)       |
| Specialty*                 |               |
| Anaesthesia/Intensive Care | 75 (59.1)     |
| Emergency Care             | 20 (15.8)     |
| Medicine                   | 12 (9.5)      |
| Paediatrics                | 7 (5.5)       |
| Surgery                    | 6 (4.7)       |
| Obstetrics and Gynaecology | 2 (1.6)       |
| Other                      | 5 (3.9)       |

147 \* As the experts were asked to select all that apply, the sum may exceed 100%

## 148 **Analysis and determining the defining attributes**

149 The definitions of critical illness and critical care from the scoping reviews and the expert survey  
 150 were charted and analysed using a content analysis based on methods developed by Erlingsson &  
 151 Brysiewicz.(12) First, the data from any parts of the literature and from the expert survey that  
 152 concerned the uses or definitions of the concepts were extracted. The data were coded and the  
 153 codes analysed iteratively by the study team. Redundant codes were removed and similar codes  
 154 were arranged into categories. The data were revisited when new categories arose or when diverse  
 155 opinions with contrasting attributes were identified. Through the process, themes emerged that  
 156 captured the defining attributes of the concepts. Using the defining attributes, definitions of the  
 157 concepts were constructed by the research team to be coherent and useful.

## 159 **Presenting a model case, related and contrary cases, identifying antecedents and 160 consequences, and defining empirical referents**

1  
2  
3 161 The model cases, related, and contrary cases were developed by the researchers to provide  
4 162 examples to illustrate the defining attributes of the concepts that emerged from the concept  
5 163 analysis. Model cases were developed to be clinically realistic and to include all the defining  
6 164 attributes. Related cases were developed that include some, but not all, of the defining attributes,  
7 165 and contrary cases that are clearly “not the concept”, containing none of the defining attributes.  
8 166 For simplicity in this study, we limited our cases to examples of patients with respiratory disease.  
9 167 Antecedents and consequences were identified as events that occur prior to the occurrence of each  
10 168 concept and as the outcomes of each concept respectively. Empirical referents were identified as  
11 169 phenomena that demonstrate the occurrence of each concept “in real life”.

12  
13  
14  
15  
16  
17  
18  
19 170 **Ethical considerations:** Informed consent was provided by all of the experts. The Research Ethics  
20 171 Committee of the London School of Hygiene and Tropical Medicine approved the study  
21 172 (Reference number 22661).

22  
23  
24  
25 173

## 26 27 174 **Results**

28  
29  
30 175 The results relate to steps 4-8 in the Walker and Avant approach, as steps 1-3 have been described  
31 176 in the introduction and methods.

### 32 33 177 **Critical Illness**

#### 34 35 178 **Defining attributes**

36  
37  
38  
39 179 A total of 48 codes were identified from the uses and definitions of critical illness from the scoping  
40 180 review and expert survey. The codes were analysed into 14 categories and 4 themes. (Table 2).  
41 181 The themes represent the defining attributes of critical illness: *high risk of imminent death*; *vital*  
42 182 *organ dysfunction*; *requirement for care to avoid death*; and *potential reversibility*. (Figure 1)

43  
44  
45  
46 183 **Table 2. Content analysis for the concept *critical illness***

| Code                                                   | Category                    | Theme                              |
|--------------------------------------------------------|-----------------------------|------------------------------------|
| Severe illness                                         | Severe illness              | <b>High risk of imminent death</b> |
| Process of increasing severity                         |                             |                                    |
| Imminent risk of death                                 | High risk of imminent death |                                    |
| Enough severity to lead to death rapidly               |                             |                                    |
| Can kill within a short time                           |                             |                                    |
| Medical condition that results in short term mortality |                             |                                    |
| Sudden onset illness or acute deterioration            |                             |                                    |

|                                                                                   |                                     |                                            |                                |
|-----------------------------------------------------------------------------------|-------------------------------------|--------------------------------------------|--------------------------------|
| Acute life-threatening illness                                                    | Acute onset or deterioration        |                                            |                                |
| An episode of acute illness                                                       |                                     |                                            |                                |
| Increased risk of death                                                           | Life-threatening                    |                                            |                                |
| Continuous threat to life and well-being                                          |                                     |                                            |                                |
| Life-threatening or potentially life-threatening disease                          |                                     |                                            |                                |
| High probability of life-threatening deterioration                                |                                     |                                            |                                |
| Acutely life-threatening injury or illness                                        |                                     |                                            |                                |
| At least one and often multiple organ dysfunction                                 | Organ dysfunction or failure        |                                            | <b>Vital organ dysfunction</b> |
| Failure in one or more organ systems that needs support                           |                                     |                                            |                                |
| Hemodynamic instability, respiratory failure, seizure, disorders of consciousness |                                     |                                            |                                |
| Diseases with vital organ failures as complications                               | Threatened organ dysfunction        |                                            |                                |
| Threatened organ failure                                                          |                                     |                                            |                                |
| Potential disturbances of vital organ functions                                   |                                     |                                            |                                |
| Threatened end-organ damage                                                       | Vital signs derangements            |                                            |                                |
| Deranged vital parameters                                                         |                                     |                                            |                                |
| Physiologic reserve is diminished, as manifested by abnormal vital signs          |                                     |                                            |                                |
| NEWS2 $\geq 7$                                                                    | Treatment needed to avoid death     | <b>Requirement for care to avoid death</b> |                                |
| Associated with significant morbidities if untreated                              |                                     |                                            |                                |
| Decline in a patient's ability to survive on their own                            |                                     |                                            |                                |
| Conditions requiring rapid intervention to avert death or disability              |                                     |                                            |                                |
| An illness which without rapid treatment would result in death or disability.     |                                     |                                            |                                |
| Needs prompt and sustained intervention to avert death or lifelong disability     |                                     |                                            |                                |
| If no intervention is made, death is certain                                      | Requirement for immediate treatment |                                            |                                |
| Requiring minute-by-minute nursing and/or medical care                            |                                     |                                            |                                |
| Requires a rapid diagnosis and response to ensure good outcomes                   |                                     |                                            |                                |
| Illnesses where timely care can reduce the chances of death and disability        |                                     |                                            |                                |
| Requires immediate intervention                                                   |                                     |                                            |                                |
| The illness needs close monitoring and prompt management                          | Requirement for organ support       |                                            |                                |
| Treatment delays of hours or less make interventions less effective               |                                     |                                            |                                |
| Requiring organ support                                                           |                                     |                                            |                                |
| Requiring vital organ support                                                     | Requires critical care              |                                            |                                |
| Requiring intensified patient monitoring and organ support                        |                                     |                                            |                                |
| Critical care services                                                            | Need for specific care              |                                            |                                |
| ICU admission                                                                     |                                     |                                            |                                |
| Illness that results in need for more than standard of care                       | Reversible with treatment           | <b>Potential reversibility</b>             |                                |
| Acute disease that needs specific treatment alongside the disease itself          |                                     |                                            |                                |
| Some element of treatability                                                      | Potentially reversible              |                                            |                                |
| Any treatable life-threatening reversible illness                                 |                                     |                                            |                                |
| Reversible life-threatening organ failure                                         |                                     |                                            |                                |
| Life-threatening situation, illness or disease that is potentially reversible     |                                     |                                            |                                |
| Acute potentially reversible illness                                              |                                     |                                            |                                |

184

## 185 **Figure 1**

186

### 187 **Proposed operational definition**

188 The proposed definition for critical illness is “*Critical illness is a state of ill health with vital organ*  
 189 *dysfunction, a high risk of imminent death if care is not provided and the potential for*  
 190 *reversibility.*”

1  
2  
3 191 **Cases**  
4

5  
6 192 **A model case of critical illness (a case including all the defining attributes)**  
7

8 193 A woman has a viral pneumonia. She is breathless and hypoxic with a low oxygen level in her  
9  
10 194 blood (oxygen saturation) of 74%. Her lungs are dysfunctional, and she has a life-threatening  
11  
12 195 condition that is likely to lead to her death in the next few hours. She requires care to support her  
13  
14 196 lungs (oxygen therapy) and if she receives that care, she has a chance of recovery.

15  
16 197 **A related case for critical illness (a case including some of the defining attributes but not the**  
17  
18 198 **attribute of “imminently life-threatening”)**

19 199 A man has a chest infection. He has a fever, is coughing up green sputum and feels short-of-breath  
20  
21 200 when walking. He has an oxygen saturation of 91%. He has a serious condition, but it is not  
22  
23 201 imminently life-threatening. He requires treatment, likely with antibiotics, but it is uncertain  
24  
25 202 whether he requires any organ support such as oxygen. His condition is potentially reversible, and  
26  
27 203 he can recover.

28  
29 204 **A contrary case for critical illness (a clear example of “not the concept”)**

30 205 A woman has lung cancer. She is coughing up small amounts of blood but is able to walk to the  
31  
32 206 hospital. She has an oxygen saturation of 94%. She is sick and she requires treatment. However,  
33  
34 207 her illness is not imminently life-threatening, she has no dysfunctional vital organ and she does  
35  
36 208 not require immediate care. Her condition may or may not be reversible.

37  
38 209 **Antecedents and consequences of Critical Illness**

39  
40 210 The antecedents of critical illness are the onset of illness, in mild or moderate form, with  
41  
42 211 progressing severity. The consequences of critical illness are either recovery or death.  
43

44  
45 212 **Empirical Referents**

46  
47 213 There are an estimated 30-45 million cases of critical illness globally each year(1). Many patients  
48  
49 214 are cared for in hospitals with illnesses that are causing vital organ dysfunction and that are  
50  
51 215 imminently life-threatening. There is much work done to identify patients with critical illness such  
52  
53 216 as the use of single severely deranged vital signs(13), or compound scoring systems such as the  
54  
55 217 National Early Warning Score (NEWS) and The Sequential Organ Failure Assessment score  
56  
57 218 (SOFA) (14,15). In hospitals, the severity of patients' conditions can be assessed using tools such

219 as the Acute Physiology and Chronic Health Evaluation (APACHE) (16) and the Simplified Acute  
220 Physiology Score (SAPS)(17).

221

## 222 ***Critical Care***

### 223 **Defining attributes**

224 A total of 60 codes were identified from the definitions of critical care from the scoping review  
225 and expert survey. The codes were analysed into 13 categories and 5 themes. (Table 3) The themes  
226 represent the concept's defining attributes: *identification, monitoring and treatment of critical*  
227 *illness; vital organ support; initial and sustained care; any care of critical illness; and specialized*  
228 *human and physical resources.* (Figure 2)

229 **Table 3: Content analysis for the concept *critical care***

| Codes                                                                                                                     | Category                                                                     | Theme                                                               |
|---------------------------------------------------------------------------------------------------------------------------|------------------------------------------------------------------------------|---------------------------------------------------------------------|
| Identifying and addressing critical illness                                                                               | Identification and monitoring of critical illness                            | <b>Identification, monitoring and treatment of critical illness</b> |
| Medical care with timely monitoring                                                                                       |                                                                              |                                                                     |
| Appropriate monitoring of critical illness                                                                                |                                                                              |                                                                     |
| Management of critically ill patients                                                                                     | Treatment of critical illness                                                |                                                                     |
| Treat critical illness                                                                                                    |                                                                              |                                                                     |
| Care given to the critically ill                                                                                          |                                                                              |                                                                     |
| Services required to stabilize critical illness                                                                           |                                                                              |                                                                     |
| Reduce the risk of death from a critical illness                                                                          |                                                                              |                                                                     |
| Care dedicated to patients with severe illness or potentially severe condition                                            | Addressing life-threatening condition                                        |                                                                     |
| Managing life-threatening condition                                                                                       |                                                                              |                                                                     |
| Preventing the occurrence of life-threatening conditions                                                                  |                                                                              |                                                                     |
| Treatment and management due to the threat of imminent deterioration                                                      |                                                                              |                                                                     |
| Medical care required to reduce the risk to the patient's life                                                            | Supporting vital functions                                                   |                                                                     |
| Care to sustain cardiopulmonary functions                                                                                 |                                                                              |                                                                     |
| Support the patient's hemodynamic or cardiorespiratory status                                                             |                                                                              |                                                                     |
| Supportive care in critical illness to enable body's systems to continue functioning before definitive treatment can work |                                                                              |                                                                     |
| Care of vital organ failure                                                                                               |                                                                              |                                                                     |
| Focus of care on supporting vital organs until improvement                                                                |                                                                              |                                                                     |
| Providing organ support                                                                                                   |                                                                              |                                                                     |
| Main focus on organ-supporting treatment.                                                                                 | Organ support                                                                |                                                                     |
| Support of vital organ function, or reverse specific organ dysfunctions                                                   |                                                                              |                                                                     |
| Supportive care for organs that are failing                                                                               |                                                                              |                                                                     |
| Provision of support to dysfunctional body systems                                                                        |                                                                              |                                                                     |
| Early management for saving and maintaining life                                                                          | Timely care                                                                  | <b>Initial and sustained care</b>                                   |
| Rapid and timely intervention that is administered in critical illness                                                    |                                                                              |                                                                     |
| From admission until the course of illness ends, either in full recovery or death                                         | From start of critical illness until the patient is no longer critically ill |                                                                     |
| From home through to discharge from hospital                                                                              |                                                                              |                                                                     |
| From the time of first contact with healthcare services through to stabilization                                          |                                                                              |                                                                     |
| To the point where the illness or injury is no longer acutely life-threatening                                            |                                                                              |                                                                     |

|                                                                                                        |                                              |                                                 |
|--------------------------------------------------------------------------------------------------------|----------------------------------------------|-------------------------------------------------|
| Critical care could be over days to weeks                                                              | Sustained care                               |                                                 |
| Constant monitoring                                                                                    |                                              |                                                 |
| Irrespective of the location of the patient within the health system                                   | Any location                                 | <b>Any care of critical illness</b>             |
| Anywhere in the emergency or inpatient setting                                                         |                                              |                                                 |
| Any care provided to critically ill patients                                                           | Any care provided to critically ill patients |                                                 |
| Can be specialized care but depends on the level of resources                                          |                                              |                                                 |
| Usually located in an area with infrastructure to support these activities                             | Specific area                                | <b>Specialized human and physical resources</b> |
| Inside a healthcare facility, outside the emergency department                                         |                                              |                                                 |
| High dependency care                                                                                   |                                              |                                                 |
| Care in ICU or Critical care unit                                                                      |                                              |                                                 |
| A place where equipment, staff and environment is ready to save patients with life-threatening disease | Multi-disciplinary and specialist staff      |                                                 |
| Multidisciplinary care                                                                                 |                                              |                                                 |
| Specially trained staff                                                                                |                                              |                                                 |
| Essentially a team-based and multi-professional care                                                   | High-intensity care                          |                                                 |
| Requires the grouping of special facilities and specially trained staff                                |                                              |                                                 |
| Higher level of care than is available on a general ward                                               |                                              |                                                 |
| Minute-by-minute nursing and/or medical care                                                           |                                              |                                                 |
| Advanced respiratory support / mechanical ventilation                                                  |                                              |                                                 |
| Nursing 24/7                                                                                           |                                              |                                                 |
| High nurse: patient ratio no lower than 1:2                                                            |                                              |                                                 |

230

## 231 **Figure 2:**

232

### 233 **Proposed operational definition of *Critical care***

234 The proposed definition for critical care is “*Critical care is the identification, monitoring and*  
 235 *treatment of patients with critical illness through the initial and sustained support of vital organ*  
 236 *functions.*”

### 237 ***Cases***

#### 238 **A model case of critical care (a case including all the defining attributes)**

239 A woman with a viral pneumonia is rapidly identified as critically ill when she arrives at the  
 240 hospital. She is immediately admitted to a unit with supplies for managing critically ill patients  
 241 and treatment is started. Nurses and doctors who have been trained in the care of critical illness  
 242 monitor her regularly, and provide continuous care, titrating the treatments as needed. Continuous  
 243 oxygen therapy is provided for her life-threatening hypoxia, supporting her respiratory  
 244 dysfunction, until she has recovered and is no longer critically ill.

#### 245 **A related case of critical care (a case including some of the defining attributes but not the** 246 **attribute of “vital organ support”)**

247 Care in a hospital is provided to a man with a chest infection. A nurse assesses him at arrival to  
248 hospital. A doctor admits him to the ward, prescribes antibiotics and decides he is not critically ill  
249 and does not require support for any of his vital organs. After four days the doctor discharges him  
250 from hospital.

### 251 **A contrary case of critical care (a clear example of “not the concept”)**

252 In the outpatient department, care is provided to a woman with lung cancer. A doctor and a nurse  
253 do some investigations and prescribe some medications. She is sent home with a follow-up  
254 appointment two weeks later.

### 255 **Antecedents and consequences of critical care**

256 The antecedents of critical care are the contact of the patient with the healthcare system and may  
257 include other care of a patient who has not deteriorated to the point of becoming critically ill. The  
258 consequences of critical care are either the patient’s recovery or death.

### 259 **Empirical Referents**

260 Many hospitals have wards or units for the provision of critical care, such as Emergency Units,  
261 High Dependency Units or Intensive Care Units (ICUs) (18). Critical care can also be provided in  
262 general wards, and a recent global consensus specified the care that should be included for all  
263 patients with critical illness in any hospital location (19). Rapid Response Teams or Medical  
264 Emergency Teams have been introduced into some hospitals, often consisting of staff from the  
265 ICU responding to calls from the wards when a critically ill patient has been identified, and  
266 providing either critical care on the ward, or transferring the patient to the ICU (20).

### 268 **Discussion**

269 We have described how the concepts *critical illness* and *critical care* are used and defined in the  
270 literature and by global experts using a concept analysis approach.

271 Our proposed definition for critical illness of, “*a state of ill health with vital organ dysfunction, a*  
272 *high risk of imminent death if care is not provided and the potential for reversibility*”, is similar to  
273 those in some key publications. Chandrashekar et al state that, “*Critical illness is any condition*  
274 *requiring support of failing vital organ systems without which survival would not be possible*”

1  
2  
3 275 (21) . Painter et al write that, “*A critically ill or injured patient is defined as one who has an*  
4 276 *illness or injury impairing one or more vital organ systems such that there is a high probability of*  
5 277 *imminent or life-threatening deterioration in the patient's condition*”(22) . Indeed, we found  
6  
7 278 widespread agreement in the literature and expert sources that critical illness concerns life-  
8  
9 279 threatening illness with organ dysfunction.

10  
11  
12 280 However, we found diverse and varied usage of the concept concerning the attribute of reversibility  
13  
14 281 and the interface between critical illness and the natural process of dying. Some uses included only  
15  
16 282 illness that was potentially reversible – these sources regarded that for critical illness there should  
17  
18 283 be a possible chance of recovery. Without this, critical illness would be a concept that encompasses  
19  
20 284 the dying process – everyone would be critically ill immediately before death – which would  
21  
22 285 conflict with many clinical uses and understandings of the term., Others had a wider interpretation  
23  
24 286 including all life-threatening illness and did not include reversibility in the definition as it is  
25  
26 287 difficult to identify in the clinical setting, and the concept risks becoming context dependent, (high-  
27  
28 288 resource interventions may reverse some critical illness which would not be possible in low-  
29  
30 289 resource healthcare). Our iterative content analysis method led to our interpretation that  
31  
32 290 reversibility should be included as one of the defining attributes, and this conclusion should be  
33  
34 291 seen as one possible interpretation that can stimulate further discussion.

35  
36 292 It is hoped that the proposed definition of critical illness assists communication in the field.  
37  
38 293 Previously, studies about critical illness have focused on patients in certain hospital units, or with  
39  
40 294 diseases or syndromes as proxies for critical illness that exclude some critically ill patients.(1)  
41  
42 295 Our definition of critical illness is not diagnosis or syndrome specific and can be due to any  
43  
44 296 underlying condition. The definition could facilitate the specification of clinical criteria for the  
45  
46 297 identification of critical illness, estimates of the overall burden of critical illness, assessments of  
47  
48 298 outcomes for patients with critical illness across centres and settings, and interventions to improve  
49  
50 299 outcomes.

51  
52 300 For critical care, there was greater diversity around its use and definition. There was widespread  
53  
54 301 agreement that critical care is the care of critically ill patients including the support of vital organs.  
55  
56 302 However, there were differing uses around the location of the care and the need for specialized  
57  
58 303 resources. Some sources considered critical care to be only the care provided in certain locations,  
59  
60 304 (such as ICUs or critical care units), or to be care that is always highly specialized or resource-



1  
2  
3 305 intensive. The World Federation of Societies of Intensive and Critical Care Medicine have  
4 306 suggested that critical care is synonymous with intensive care and is, “*a multidisciplinary and*  
5 307 *interprofessional specialty dedicated to the comprehensive management of patients having, or at*  
6 308 *risk of developing, acute, life-threatening organ dysfunction. [Critical care] uses an array of*  
7 309 *technologies that provide support of failing organ systems, particularly the lungs, cardiovascular*  
8 310 *system, and kidneys.*”(18) In contrast, other sources used critical care to be inclusive of any  
9 311 care for patients with critical illness, irrespective of location or resources. The Joint Faculty of  
10 312 Intensive Care Medicine of Ireland state that critical care units are those that, “*provide life*  
11 313 *sustaining treatment for critically ill patients with acute organ dysfunction due to potentially*  
12 314 *reversible disease*”,(23) and in Belgium, critical care beds have been defined as any beds “*for*  
13 315 *patients with one or more organ functions compromised*”(24) Hirshon et al strike a balance  
14 316 between these two contrasting views, “[*Critical care is] the specialized care of patients whose*  
15 317 *conditions are life-threatening and who require comprehensive care and constant monitoring,*  
16 318 *usually in intensive care units.*” (25)

17  
18  
19 319 Our proposed definition of, “*the identification, monitoring and treatment of patients with critical*  
20 320 *illness through the initial and sustained support of vital organ functions*”, aims to be inclusive.  
21 321 Critical care may include the use of specialized resources but it is not a requirement. We see this  
22 322 as a strength in the definition, as it maintains a patient-centred rather than setting-dependent focus.  
23 323 Critical care when defined in this way can be provided anywhere and does not have to be resource-  
24 324 intensive – it includes both high-resource care in ICUs and lower resource care in other settings.  
25 325 Indeed, critical care can even be provided in general wards, in small health facilities, in the  
26 326 community or in ambulances. High-resource intensive care may not be possible in low-resource  
27 327 settings, but such settings care for many critically ill patients who require critical care(4,26,27).  
28 328 The definition focuses on supporting vital organ functions, emphasising that critical care’s primary  
29 329 focus is treating the critical condition of the patient rather than definitive care for the underlying  
30 330 condition(28,29). Critical care, as we have defined it, can be seen as a system of care of patients  
31 331 with critical illness throughout the course of their illness, from the time of their first contact with  
32 332 healthcare through to resolution of the critical illness or death. Critical care is part of the wider  
33 333 concept of acute care which also includes prehospital care, emergency care, trauma and surgery  
34 334 care, as well as in-patient care in medical, surgical, pediatric, obstetric and other wards(29).

1  
2  
3 335  
4  
56 336 **Strengths and Limitations**  
7

8  
9 337 To our knowledge, this is the first study attempting to describe the uses and definitions of the  
10 338 concepts *critical illness* and *critical care*, and to identify the defining attributes leading to proposed  
11 339 definitions of the concepts. A strength is the use of both a scoping review of the literature and the  
12 340 inclusion of over one hundred clinical experts as sources. The findings of the analysis should be  
13 341 seen as a first step and we recognise that the use of concepts is fluid and changes over time (6).  
14 342 We were limited to including literature in English and to published studies and guidelines and we  
15 343 may have missed relevant publications in other languages or in other grey literature. Our sample  
16 344 of experts was purposively selected and had global representation but was not perfectly  
17 345 symmetrical to continents, specialty, cadre or gender and we are likely to have missed experts who  
18 346 could have provided valuable contributions. We acknowledge that the proposed definitions may  
19 347 not be universally accepted, and we hope our analysis and findings move the conversation  
20 348 forwards, providing input about how to communicate and collaborate around these vitally  
21 349 important concepts, and ultimately how to improve the care and outcomes for critically ill patients.

22  
23  
24  
25  
26  
27  
28  
29  
30  
31  
32  
33 35034 351 **Conclusion**  
35

36 352 The concepts critical illness and critical care lack consensus definitions and have varied uses.  
37 353 Through concept analysis of the uses in the literature and among experts we propose the  
38 354 definitions: “*Critical illness is a state of ill health with vital organ dysfunction, a high risk of*  
39 355 *imminent death if care is not provided and the potential for reversibility*” and “*Critical care is the*  
40 356 *identification, monitoring and treatment of patients with critical illness through the initial and*  
41 357 *sustained support of vital organ functions.*”

42  
43  
44  
45  
46  
47 358 **Figure 1 : The defining attributes of critical illness**48  
49  
50 359 **Figure 2: The defining attributes of critical care**  
5152 360  
53  
54  
55 361  
56  
57  
58  
59  
60

1  
2  
3 362  
4  
5  
6 363  
7

8 364 **Acknowledgements:** We thank all the experts who participated in the study.  
9

10 365 **Author Contributions:** TB & OS designed the study. RKK, TT, HM and TB collected the data.  
11 366 All the authors contributed to analysing the data. RKK and TB wrote the first draft of the  
12 367 manuscript. All authors critically reviewed the manuscript and approved the final version. The  
13 368 corresponding author attests that all listed authors meet authorship criteria and that no others  
14 369 meeting the criteria have been omitted.  
15  
16  
17  
18

19 370 **Funding:** This research received no specific grant from any funding agency in the public,  
20 371 commercial or not-for-profit sectors  
21  
22  
23

24 372 **Disclaimer:** We confirm the independence of researchers and that all authors in study can take  
25 373 responsibility for the integrity of the data and the accuracy of the data analysis.  
26  
27

28 374 **Competing Interests:** None Declared  
29

30 375 **Patient Consent for Publication:** Not required  
31

32 376 **Ethics Approval:** The Research Ethics Committee of the London School of Hygiene and Tropical  
33 377 Medicine approved the study (Reference number 22661).  
34  
35  
36

37 378 **Provenance and Peer Review:** Not commissioned, externally reviewed  
38

39 379 **Data Availability Statement:** The study data are available from the corresponding author on  
40 380 reasonable request  
41  
42

43 381 **Supplementary Files:** Supplementary Tables 1 and 2  
44

45 382 **Patient and Public Involvement:** No patient involved.  
46  
47

48 383  
49

## 50 384 **References**

- 51  
52 385 1. Adhikari NK, Fowler RA, Bhagwanjee S, Rubenfeld GD. Critical care and the global burden of  
53 386 critical illness in adults. The Lancet. 2010 Oct;376(9749).  
54  
55  
56  
57  
58  
59  
60

- 1  
2  
3 387 2. Vukoja M, Riviello ED, Schultz MJ. Critical care outcomes in resource-limited settings. *Current*  
4 388 *Opinion in Critical Care*. 2018 Oct;24(5):421–7.
- 5  
6 389 3. Biccard BM, Gopalan PD, Miller M, Michell WL, Thomson D, Ademuyiwa A, et al. Patient care and  
7 390 clinical outcomes for patients with COVID-19 infection admitted to African high-care or intensive  
8 391 care units (ACCCOS): a multicentre, prospective, observational cohort study. *The Lancet*. 2021  
9 392 May;397(10288):1885–94.
- 10  
11 393 4. Murthy S, Leligdowicz A, Adhikari NKJ. Intensive Care Unit Capacity in Low-Income Countries: A  
12 394 Systematic Review. *PLOS ONE*. 2015 Jan 24;10(1):e0116949.
- 13  
14  
15 395 5. Arabi YM, Azoulay E, Al-Dorzi HM, Phua J, Salluh J, Binnie A, et al. How the COVID-19 pandemic  
16 396 will change the future of critical care. *Intensive Care Medicine*. 2021 Mar 22;47(3):282–91.
- 17  
18 397 6. Walker LO, Avant KC. *Strategies for Theory Construction in Nursing*. 5th Edition. Pearson; 2011.
- 19  
20 398 7. Xyrichis A, Ream E. Teamwork: A concept analysis. *Journal of Advanced Nursing*. 2008  
21 399 Jan;61(2):232–41.
- 22  
23 400 8. Allvin R, Berg K, Idvall E, Nilsson U. Postoperative recovery: a concept analysis. *Journal of*  
24 401 *Advanced Nursing*. 2007 Mar;57(5).
- 25  
26 402 9. Rebmann T. Defining bioterrorism preparedness for nurses: concept analysis. *Journal of*  
27 403 *Advanced Nursing*. 2006 Jun;54(5).
- 28  
29 404 10. Arksey H, O'Malley L. Scoping studies: towards a methodological framework. *International*  
30 405 *Journal of Social Research Methodology*. 2005 Feb;8(1).
- 31  
32 406 11. Ouzzani M, Hammady H, Fedorowicz Z, Elmagarmid A. Rayyan—a web and mobile app for  
33 407 systematic reviews. *Systematic Reviews*. 2016 Dec 5;5(1).
- 34  
35 408 12. Erlingsson C, Brysiewicz P. A hands-on guide to doing content analysis. *African Journal of*  
36 409 *Emergency Medicine*. 2017 Sep;7(3).
- 37  
38 410 13. Schell CO, Castegren M, Lugazia E, Blixt J, Mulungu M, Konrad D, et al. Severely deranged vital  
39 411 signs as triggers for acute treatment modifications on an intensive care unit in a low-income  
40 412 country. *BMC Research Notes*. 2015 Dec 25;8(1).
- 41  
42 413 14. Seymour CW, Liu VX, Iwashyna TJ, Brunkhorst FM, Rea TD, Scherag A, et al. Assessment of Clinical  
43 414 Criteria for Sepsis. *JAMA*. 2016 Feb 23;315(8).
- 44  
45 415 15. Smith GB, Redfern OC, Pimentel MA, Gerry S, Collins GS, Malycha J, et al. The National Early  
46 416 Warning Score 2 (NEWS2). *Clinical Medicine*. 2019 May 15;19(3).
- 47  
48 417 16. Knaus WA DEWDZJ. APACHE II: a severity of disease classification system. *Critical Care Medicine*.  
49 418 *Critical Care Medicine*. 1985;
- 50  
51  
52 419 17. Moreno RP, Metnitz PGH, Almeida E, Jordan B, Bauer P, Campos RA, et al. SAPS 3 - From  
53 420 evaluation of the patient to evaluation of the intensive care unit. Part 2: Development of a  
54 421 prognostic model for hospital mortality at ICU admission. *Intensive Care Medicine*.  
55 422 2005;31(10):1345–55.

1  
2  
3  
4  
5  
6  
7  
8  
9  
10  
11  
12  
13  
14  
15  
16  
17  
18  
19  
20  
21  
22  
23  
24  
25  
26  
27  
28  
29  
30  
31  
32  
33  
34  
35  
36  
37  
38  
39  
40  
41  
42  
43  
44  
45  
46  
47  
48  
49  
50  
51  
52  
53  
54  
55  
56  
57  
58  
59  
60

- 423 18. Marshall JC, Bosco L, Adhikari NK, Connolly B, Diaz J v., Dorman T, et al. What is an intensive care  
424 unit? A report of the task force of the World Federation of Societies of Intensive and Critical Care  
425 Medicine. *Journal of Critical Care*. 2017 Feb;37:270–6.
- 426 19. Schell CO, Khalid K, Wharton-Smith A, Oliwa J, Sawe HR, Roy N, et al. Essential Emergency and  
427 Critical Care: a consensus among global clinical experts. *BMJ Global Health*. 2021 Sep 21;6(9).
- 428 20. Maharaj R, Raffaele I, Wendon J. Rapid response systems: a systematic review and meta-analysis.  
429 2015;
- 430 21. Chandrashekar M, Shivaraj BM, Krishna VP. A study on prognostic value of serum cortisol in  
431 determining the outcome in the critically ill patients. *Journal of Evolution of Medical and Dental  
432 Sciences*. 2015 Jul 17;4(58).
- 433 22. Painter JR. Critical Care in the Surgical Global Period. *Chest*. 2013 Mar;143(3).
- 434 23. Joint Faculty of Intensive Care Medicine of Ireland. National Standards for Adult Critical Care  
435 Services 2011. 2011.
- 436 24. Wunsch H, Angus DC, Harrison DA, Collange O, Fowler R, Hoste EAJ, et al. Variation in critical care  
437 services across North America and Western Europe\*. *Critical Care Medicine*. 2008  
438 Oct;36(10):2787-e8.
- 439 25. Hirshon JM, Risko N, Calvillo EJ, Stewart de Ramirez S, Narayan M, Theodosios C, et al. Health  
440 systems and services: the role of acute care. *Bulletin of the World Health Organization*. 2013 May  
441 1;91(5):386–8.
- 442 26. Prin M, Wunsch H. International comparisons of intensive care. *Current Opinion in Critical Care*.  
443 2012 Dec;18(6):700–6.
- 444 27. Manda-Taylor L, Mndolo S, Baker T. Critical care in Malawi: The ethics of beneficence and justice.  
445 *Malawi Medical Journal*. 2017 Nov 24;29(3):268.
- 446 28. Schell CO, Gerdin Wärnberg M, Hvarfner A, Höög A, Baker U, Castegren M, et al. The global need  
447 for essential emergency and critical care. Vol. 22, *Critical Care*. BioMed Central Ltd.; 2018.
- 448 29. Baker T, Schell CO, Petersen DB, Sawe H, Khalid K, Mndolo S, et al. Essential care of critical  
449 illness must not be forgotten in the COVID-19 pandemic. *The Lancet*. 2020  
450 Apr;395(10232).

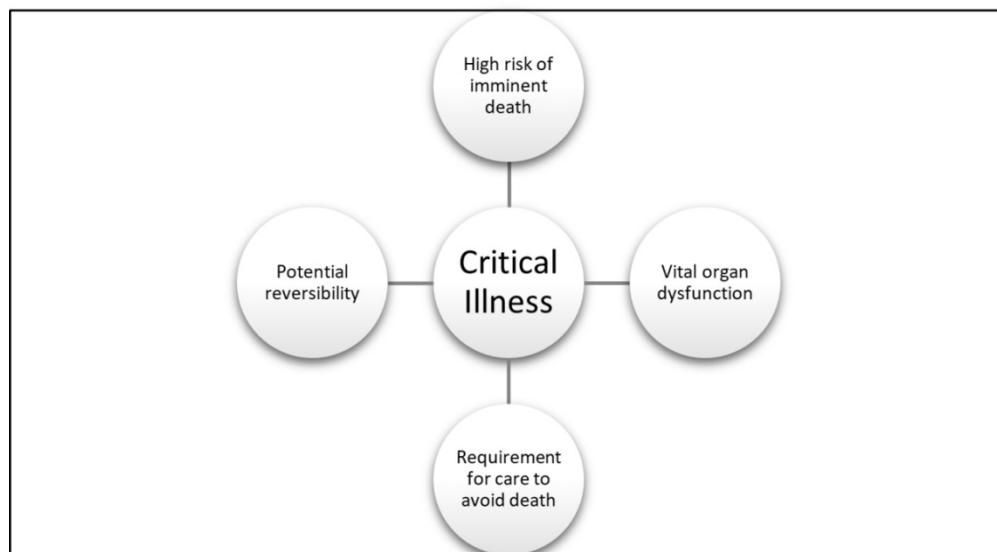

The Defining attributes of critical illness

107x61mm (300 x 300 DPI)

1  
2  
3  
4  
5  
6  
7  
8  
9  
10  
11  
12  
13  
14  
15  
16  
17  
18  
19  
20  
21  
22  
23  
24  
25  
26  
27  
28  
29  
30  
31  
32  
33  
34  
35  
36  
37  
38  
39  
40  
41  
42  
43  
44  
45  
46  
47  
48  
49  
50  
51  
52  
53  
54  
55  
56  
57  
58  
59  
60

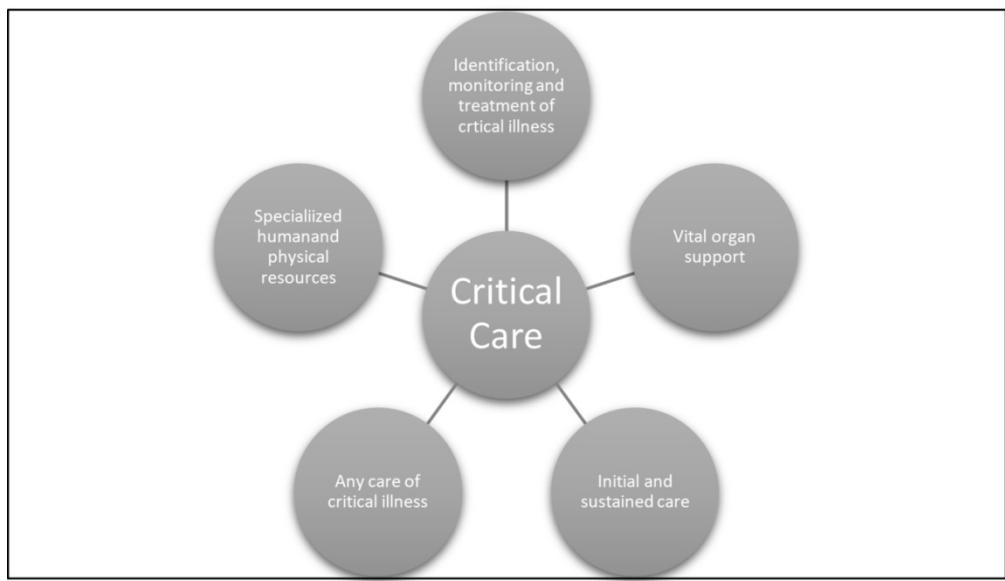

The defining attributes of critical care

114x67mm (300 x 300 DPI)

**Supplementary Table 1 Literature with definitions of critical illness**

|   | <b>First Author and Publication Date</b> | <b>Country</b> | <b>Reference</b>                                                                                                                                                                                                                              |
|---|------------------------------------------|----------------|-----------------------------------------------------------------------------------------------------------------------------------------------------------------------------------------------------------------------------------------------|
| 1 | Kievlan 2016                             | United States  | Kievlan DR, Martin-Gill C, Kahn JM, Callaway CW, Yealy DM, Angus DC, et al. External validation of a prehospital risk score for critical illness. <i>Crit Care</i> . 2016;20(1):255.                                                          |
| 2 | Warttig 2018                             | United Kingdom | Warttig S, Alderson P, Evans DJW, Lewis SR, Kourbeti IS, Smith AF. Automated monitoring compared to standard care for the early detection of sepsis in critically ill patients (Review). <i>Cochrane Database of Syst Rev</i> . 2018(6):28.   |
| 3 | Rodriguez 2018                           | United States  | Rodriguez RM, Greenwood JC, Nuckton TJ, Darger B, Shofer FS, Troeger D, et al. Comparison of qSOFA with current emergency department tools for screening of patients with sepsis for critical illness. <i>Emerg Med J</i> . 2018;35(6):350-6. |
| 4 | Benneyworth 2015                         | United States  | Benneyworth BD, Bennett WE, Carroll AE. Cross-sectional comparison of critically ill pediatric patients across hospitals with various levels of pediatric care. <i>BMC Res Notes</i> . 2015;8:693.                                            |
| 5 | Hsu 2016                                 | Taiwan         | Hsu CW, Lin CS, Chen SJ, Lin SH, Lin CL, Kao CH. Risk of type 2 diabetes mellitus in patients with acute critical illness: a population-based cohort study. <i>Intensive Care Med</i> . 2016;42(1):38-45.                                     |
| 6 | Painter 2013                             | United States  | Painter JR. Critical Care in the Surgical Global Period. <i>Chest</i> . 2013;143(3):851-5.                                                                                                                                                    |
| 7 | Chandrashekar 2015                       | India          | Chandrashekar M, Shivaraj BM, Krishna VP. A study on prognostic value of serum cortisol in determining the outcome in the critically ill patients. <i>JEMDS</i> . 2015;4(58):10130-5.                                                         |
| 8 | Liao 2014                                | United States  | Liao MM, Lezotte D, Lowenstein SR, Howard K, Finley Z, Feng ZP, et al. Sensitivity of systemic inflammatory response syndrome for critical illness among ED patients. <i>Am J of Emerg Med</i> . 2014;32(11):1319-25.                         |
| 9 | Valentin 2011                            | 23 countries   | Valentin A, Ferdinande P, Improvem EWGQ. Recommendations on basic requirements for intensive care units: structural and organizational aspects. <i>Intensive Care Med</i> . 2011;37(10):1575-87.                                              |



1  
2  
3  
4  
5  
6  
7  
8  
9  
10  
11  
12  
13  
14  
15  
16  
17  
18  
19  
20  
21  
22  
23  
24  
25  
26  
27  
28  
29  
30  
31  
32  
33  
34  
35  
36  
37  
38  
39  
40  
41  
42  
43  
44  
45  
46

For peer review only

Supplementary Table 2 Literature with definitions of critical care

|    | First Author and Publication Date                                                              | Country                                    | Reference                                                                                                                                                                                                                                                                |
|----|------------------------------------------------------------------------------------------------|--------------------------------------------|--------------------------------------------------------------------------------------------------------------------------------------------------------------------------------------------------------------------------------------------------------------------------|
| 1  | Wunsch 2008                                                                                    | United States, France, UK, Canada, Belgium | Wunsch H, Angus DC, Harrison DA, Collange O, Fowler R, Hoste EA, et al. Variation in critical care services across North America and Western Europe. <i>Crit Care Med</i> . 2008;36(10):2787-93, e1-9                                                                    |
| 2  | Prin 2012                                                                                      | United States                              | Prin M, Wunsch H. International comparisons of intensive care: informing outcomes and improving standards. <i>Curr Opin Crit Care</i> . 2012;18(6):700-6                                                                                                                 |
| 3  | Painter 2013                                                                                   | United States                              | Painter JR. Critical care in the surgical global period. <i>Chest</i> . 2013;143(3):851-5                                                                                                                                                                                |
| 4  | Royal College of Anaesthetists 2018                                                            | England                                    | <a href="https://www.rcoa.ac.uk/sites/default/files/documents/2020-06/EMC-Guidelines2018.pdf">https://www.rcoa.ac.uk/sites/default/files/documents/2020-06/EMC-Guidelines2018.pdf</a>                                                                                    |
| 5  | Joint Faculty of Intensive Care Medicine of Ireland and Intensive Care Society of Ireland 2019 | Ireland                                    | <a href="https://jficmi.anaesthesia.ie/wp-content/uploads/2019/09/National-Standards-for-Adult-Critical-Services-2019.pdf">https://jficmi.anaesthesia.ie/wp-content/uploads/2019/09/National-Standards-for-Adult-Critical-Services-2019.pdf</a>                          |
| 6  | Marshall 2017                                                                                  | Many countries                             | Marshall JC, Bosco L, Adhikari NK, Connolly B, Diaz J v., Dorman T, et al. What is an intensive care unit? A report of the task force of the World Federation of Societies of Intensive and Critical Care Medicine. <i>Journal of Critical Care</i> . 2017 Feb;37:270–6. |
| 7  | The International Surgical Outcomes Study 2016                                                 | Many countries                             | International Surgical Outcomes Study g. Global patient outcomes after elective surgery: prospective cohort study in 27 low-, middle- and high-income countries. <i>Br J Anaesth</i> . 2016;117(5):601-9                                                                 |
| 8  | Benneyworth 2015                                                                               | United States                              | Benneyworth BD, Bennett WE, Carroll AE. Cross-sectional comparison of critically ill pediatric patients across hospitals with various levels of pediatric care. <i>BMC Res Notes</i> . 2015;8:693.                                                                       |
| 9  | Kievlan 2016                                                                                   | United States                              | Kievlan DR, Martin-Gill C, Kahn JM, Callaway CW, Yealy DM, Angus DC, et al. External validation of a prehospital risk score for critical illness. <i>Crit Care</i> . 2016;20(1):255.                                                                                     |
| 10 | Boyle 2008                                                                                     | Australia                                  | Boyle M, Butcher R, Conyers V, Kendrick T, MacNamara M, Lang S. Transition to intensive care nursing: establishing a starting point. <i>Aust Crit Care</i> . 2008;21(4):190-8.                                                                                           |
| 11 | Hirshon 2013                                                                                   | United States                              | Hirshon JM, Risko N, Calvillo EJ, Stewart de Ramirez S, Narayan M, Theodosis C, et al. Health systems and services: the role of acute care. <i>Bull World Health Organ</i> . 2013;91(5):386-8                                                                            |
| 12 | McCarthy 2013                                                                                  | United States                              | McCarthy C, O'Rourke NC, Madison JM. Integrating advanced practice providers into medical critical care teams. <i>Chest</i> . 2013;143(3):847-50                                                                                                                         |
| 13 | Intensive Care Society 2009                                                                    | United Kingdom                             | <a href="https://icmwk.com/wp-content/uploads/2014/02/Revised-Levels-of-Care-21-12-09.pdf">https://icmwk.com/wp-content/uploads/2014/02/Revised-Levels-of-Care-21-12-09.pdf</a>                                                                                          |

# BMJ Open

## Towards definitions of critical illness and critical care using concept analysis

|                                 |                                                                                                                                                                                                                                                                                                                                                                                                                                                                                                                                                                                                                                                                                                                                                |
|---------------------------------|------------------------------------------------------------------------------------------------------------------------------------------------------------------------------------------------------------------------------------------------------------------------------------------------------------------------------------------------------------------------------------------------------------------------------------------------------------------------------------------------------------------------------------------------------------------------------------------------------------------------------------------------------------------------------------------------------------------------------------------------|
| Journal:                        | <i>BMJ Open</i>                                                                                                                                                                                                                                                                                                                                                                                                                                                                                                                                                                                                                                                                                                                                |
| Manuscript ID                   | bmjopen-2022-060972.R1                                                                                                                                                                                                                                                                                                                                                                                                                                                                                                                                                                                                                                                                                                                         |
| Article Type:                   | Original research                                                                                                                                                                                                                                                                                                                                                                                                                                                                                                                                                                                                                                                                                                                              |
| Date Submitted by the Author:   | 23-Jun-2022                                                                                                                                                                                                                                                                                                                                                                                                                                                                                                                                                                                                                                                                                                                                    |
| Complete List of Authors:       | Kayambankadzanja,, Raphael; University of Malawi College of Medicine, Public Health & Family Medicine; Queen Elizabeth Central Hospital, Anaesthesia and Intensive Care<br>Schell, Carl; Karolinska Institute, Global Public Health; Uppsala Universitet, Centre for Clinical Research Sörmland<br>Gerdin Wärnberg, Martin ; Karolinska Institutet, Department of Public Health Sciences<br>Tamras, Thomas; Södertälje Hospital<br>Mollazadegan, Hedi; Sankt Goran Hospital, The Department of Addiction Medicine<br>Holmberg, Mats; Region Sormland, Department of Ambulance Service<br>Alvesson, Helle; Karolinska Institutet, Department of Public Health Sciences<br>Baker, Tim; Karolinska Institutet, Department of Global Public Health |
| <b>Primary Subject Heading</b>: | Health services research                                                                                                                                                                                                                                                                                                                                                                                                                                                                                                                                                                                                                                                                                                                       |
| Secondary Subject Heading:      | Intensive care, Health services research, Nursing, Public health                                                                                                                                                                                                                                                                                                                                                                                                                                                                                                                                                                                                                                                                               |
| Keywords:                       | Adult intensive & critical care < ANAESTHETICS, ACCIDENT & EMERGENCY MEDICINE, HEALTH SERVICES ADMINISTRATION & MANAGEMENT                                                                                                                                                                                                                                                                                                                                                                                                                                                                                                                                                                                                                     |
|                                 |                                                                                                                                                                                                                                                                                                                                                                                                                                                                                                                                                                                                                                                                                                                                                |

SCHOLARONE™  
Manuscripts



I, the Submitting Author has the right to grant and does grant on behalf of all authors of the Work (as defined in the below author licence), an exclusive licence and/or a non-exclusive licence for contributions from authors who are: i) UK Crown employees; ii) where BMJ has agreed a CC-BY licence shall apply, and/or iii) in accordance with the terms applicable for US Federal Government officers or employees acting as part of their official duties; on a worldwide, perpetual, irrevocable, royalty-free basis to BMJ Publishing Group Ltd ("BMJ") its licensees and where the relevant Journal is co-owned by BMJ to the co-owners of the Journal, to publish the Work in this journal and any other BMJ products and to exploit all rights, as set out in our [licence](#).

The Submitting Author accepts and understands that any supply made under these terms is made by BMJ to the Submitting Author unless you are acting as an employee on behalf of your employer or a postgraduate student of an affiliated institution which is paying any applicable article publishing charge ("APC") for Open Access articles. Where the Submitting Author wishes to make the Work available on an Open Access basis (and intends to pay the relevant APC), the terms of reuse of such Open Access shall be governed by a Creative Commons licence – details of these licences and which [Creative Commons](#) licence will apply to this Work are set out in our licence referred to above.

Other than as permitted in any relevant BMJ Author's Self Archiving Policies, I confirm this Work has not been accepted for publication elsewhere, is not being considered for publication elsewhere and does not duplicate material already published. I confirm all authors consent to publication of this Work and authorise the granting of this licence.

# 1 Towards definitions of critical illness and critical care using concept analysis

2 Raphael Kazidule Kayambankadzanja<sup>1,2</sup>, Carl Otto Schell<sup>3,4,5</sup>, Martin Gerdin Wärnberg<sup>3,6</sup>, Thomas  
3 Tamras<sup>7</sup>, Hedi Mollazadegan<sup>8</sup>, Mats Holmberg<sup>9,10,11</sup>, Helle Mølsted Alvesson<sup>3</sup>, Tim Baker<sup>3,12,13</sup>

4 1. Department of Anaesthesia and Intensive Care, Queen Elizabeth Central Hospital, Blantyre Malawi

5 2. Department of Public Health, Kamuzu University of Health Sciences

6 3. Department of Global Public Health, Karolinska Institutet, Stockholm, Sweden

7 4. Centre for Clinical Research Sörmland, Uppsala University, Eskilstuna, Sweden

8 5. Department of Medicine, Nyköping Hospital, Nyköping, Sweden.

9 6. Function Perioperative Medicine and Intensive Care, Karolinska University Hospital, Solna, Sweden

10 7. Södertälje Hospital, Stockholm, Sweden

11 8. The Department of Addiction Medicine, Sankt Goran Hospital, Stockholm, Swede

12 9. Faculty of Health and Life Sciences, Linnaeus University, Växjö, Sweden

13 10. School of Health, Care and Social Welfare, Mälardalen University, Eskilstuna, Sweden

14 11. Centre for Clinical Research Sörmland, Uppsala University, Eskilstuna, Sweden

15 12. Department of Clinical Research, London School of Hygiene & Tropical Medicine, London, UK

16 13. Department of Emergency Medicine, Muhimbili University of Health and Allied Sciences, Dar es Salaam, Tanzania

17  
18 Corresponding Author: Raphael Kazidule Kayambankadzanja Email: raphkazidule@gmail.com

## 19 Abstract

### 20 Objective

21 As “critical illness” and “critical care” lack consensus definitions, this study aimed to explore how  
22 the concepts’ are used, describe their defining attributes, and propose potential definitions.

### 23 Design and Methods

24 We used the Walker and Avant approach to concept analysis. The uses and definitions of the  
25 concepts were identified through a scoping review of the literature and an online survey of 114  
26 global clinical experts. We used the Arksey and O’Malley framework for scoping reviews and  
27 searched in PubMed and Web of Science with a strategy including terms around critical  
28 illness/care and definitions/etymologies limited to publications in English since 2008. The experts  
29 were selected through purposive sampling and snowballing, with 36.8% in Africa, 25.4% in  
30 Europe, 22.8% in North America, 10.5% in Asia, 2.6% in South America and 1.8% in Australia.  
31 They worked with Anaesthesia or Intensive Care (59.1%), Emergency Care 15.8%, Medicine  
32 9.5%, Paediatrics 5.5%, Surgery 4.7%, Obstetrics and Gynaecology 1.6% and other specialties

33 3.9%. Through content analysis of the data we extracted codes, categories, and themes to determine  
34 the concepts' defining attributes and we proposed potential definitions. To assist understanding,  
35 we developed model, related and contrary cases concerning the concepts, we identified antecedents  
36 and consequences to the concepts, and defined empirical referents.

## 37 **Results**

38 Nine and 13 articles were included in the scoping reviews of critical illness and critical care  
39 respectively. A total of 48 codes, 14 categories and 4 themes were identified in the uses and  
40 definitions of critical illness and 60 codes, 13 categories and 5 themes for critical care. The defining  
41 attributes of critical illness were a high risk of imminent death; vital organ dysfunction;  
42 requirement for care to avoid death; and potential reversibility. The defining attributes of critical  
43 care were the identification, monitoring and treatment of critical illness; vital organ support; initial  
44 and sustained care; any care of critical illness; and specialized human and physical resources. The  
45 defining attributes led to our proposed definitions of critical illness as, "*a state of ill health with*  
46 *vital organ dysfunction, a high risk of imminent death if care is not provided and the potential for*  
47 *reversibility*", and of critical care as, "*the identification, monitoring and treatment of patients with*  
48 *critical illness through the initial and sustained support of vital organ functions.*"

## 49 **Conclusion**

50 The concepts critical illness and critical care lack consensus definitions and have varied uses.  
51 Through concept analysis of uses and definitions in the literature and among experts we have  
52 identified the defining attributes of the concepts and proposed definitions that could aid clinical  
53 practice, research, and policy making.

54

## 55 **Strengths and Limitations of the Study**

- 56 • This concept analysis is the first study to systematically describe the uses and definitions  
57 of the concepts *critical illness* and *critical care*
- 58 • The study uses a scoping review of the literature and input from over one hundred clinical  
59 experts from diverse settings globally to identify the defining attributes and provide  
60 proposed definitions of the concepts
- 61 • Some uses and definitions of the concepts in languages other than English, in unpublished  
62 grey literature and from clinical experts not included in the study may have been missed

- 1  
2  
3 63 • As current usage of the concepts is diverse, the proposed definitions may not be universally  
4 64 accepted and are aimed to stimulate further discussion  
5  
6  
7 65  
8  
9

## 10 66 **Introduction**

11  
12 67 The concepts *critical illness* and *critical care* are commonly used in healthcare. In PubMed, both  
13 68 concepts are Medical Subject Headings (MeSH) terms, and searches for “critical illness” or  
14 69 “critical care” return 40,000 and 220,000 articles respectively. While it may seem evident that the  
15 70 concepts concern patients with very serious illness and their care, there is a lack of consensus  
16 71 around their precise definitions.  
17  
18  
19  
20  
21

22 72 This causes problems for clinical practice, research, and policy making. For the clinician,  
23 73 discordant interpretations of when a patient is critically ill can lead to differing clinical assessments  
24 74 and treatments despite similar states: for example, Doctor A interprets Patient B’s low blood  
25 75 oxygen level as critical illness, triggers an alarm and admits the patient to an intensive care unit,  
26 76 only for Doctor C to reverse the decision and discharge the patient as she interprets the illness as  
27 77 non-critical. For the researcher, it can be difficult to design a study or interpret findings: for  
28 78 example studies into the effect of dexamethasone for critical COVID-19, or of another treatment  
29 79 for all patients with critical illness, require clear eligibility criteria and translating the findings to  
30 80 another patient group requires that the groups have similar clinical conditions. For the policy  
31 81 maker, prioritising programmes and investments designed to improve care for very sick patients  
32 82 relies on comparisons between similar groups and clearly defined interventions.  
33  
34  
35  
36  
37  
38  
39  
40  
41

42 83 Even quantifying the total global burden of critical illness has been challenging due to the lack of  
43 84 an agreed definition. Proxies have been used instead, for example summing up syndromes  
44 85 considered to comprise critical illness such as sepsis and acute lung injury – resulting in estimates  
45 86 of up to 45 million critical illness cases each year.(1) Low- and middle-income countries are  
46 87 suspected to have the highest burden (2), but the lack of a definition has hampered comparisons  
47 88 across settings(3).  
48  
49  
50  
51

52 89 Studying the care for critically ill patients has also been problematic. Studies have focused on care  
53 90 provided in hospital locations such as in intensive care or emergency units, which exclude care  
54  
55  
56  
57  
58  
59  
60

1  
2  
3 91 provided in hospitals lacking such units, and to critically ill patients in general hospital wards.(4–  
4  
5 92 6) In the COVID-19 pandemic, there have been great efforts to describe, scale-up and improve  
6  
7 93 care for critically ill patients throughout the world,(4,6) and a lack of agreement around the concept  
8  
9 94 of critical care has hampered these efforts.

10  
11 95 These examples illustrate how important concepts are as the building blocks of theories and  
12  
13 96 communication. Ideally, concepts are clearly-defined and their uses well-described for  
14  
15 97 unambiguous communication and an understanding about exactly what is being described or  
16  
17 98 explained.(7) *Concept analysis* is a method for investigating how concepts are used and  
18  
19 99 understood. Concept analyses have been conducted in diverse fields such as in teamwork(8),  
20  
21 100 postoperative recovery(9) and bioterrorism preparedness(10), all with the aim of providing basic  
22  
23 101 conceptual understanding and facilitating communication. In this paper, we have used concept  
24  
25 102 analysis, following the stepwise approach described by Walker and Avant(7). The first two steps  
26  
27 103 in the approach are to choose the concept and determine the aim of the analysis. Our chosen  
28  
29 104 concepts are *critical illness* and *critical care* and our aims are to explore the uses and definitions  
30  
31 105 of the concepts in published sources and by global clinical experts, leading to a description of the  
32  
33 106 defining attributes of the concepts and to proposed definitions.

## 34 35 36 37 38 39 40 41 42 43 44 45 46 47 48 49 50 51 52 53 54 55 56 57 58 59 60 107 **Methods**

108 Concepts are the basic building blocks in theory construction, research, and communication. A  
109  
110 concept analysis aims to define the concept's attributes and facilitate decisions about which  
111  
112 phenomena match the concept, and which do not. In this study, Walker and Avant's method for  
113  
114 concept analysis was chosen as a systematic approach used previously in similar studies.(7)The  
115  
116 approach consists of eight steps: 1) Select the concept; 2) Determine the aim of analysis; 3) Identify  
117  
118 all uses of the concept that you can discover; 4) Determine the defining attributes; 5) Identify a  
119  
120 model case; 6) Identify borderline, related, contrary, invented, and illegitimate cases; 7) Identify  
121  
122 antecedents and consequences; 8) Define empirical referents. In this paper steps 1 and 2 are  
123  
124 described in the introduction section, step 3 in the method section and steps 4-8 in the results  
125  
126 section. Thus, the continuation of this article addresses steps 3-8 in Walker and Avant's method.  
127  
128 (7)

### 129 **Step 3: Identifying the uses of the concepts**



1  
2  
3 120 We identified the uses of the concepts of critical illness and critical care through a scoping review  
4 121 of the literature and a web-based survey of global experts.

5  
6  
7 122 ***Scoping Review***

8  
9 123 We used the Arksey and O'Malley framework for scoping reviews(11). Relevant studies published  
10 124 in English since 2008 were identified in the PubMed and Web of Science databases. To include  
11 125 publications that were not found through the database searches, we hand-searched publication lists  
12 126 and grey literature of intensive care medicine and emergency medicine societies. Duplicates were  
13 127 removed using the software Rayyan(12). The publications were examined through title, then  
14 128 abstract review and lastly by full-text review. The scoping review protocols were published in  
15 129 advance on the www.protocols.io database.

16  
17  
18 130 ***Critical Illness***

19 131 The search strategy used the terms terminolog\*, etymolog\*, nomenclatur\*, OR definition\*, AND  
20 132 emergency, critical\*, acute\*, OR sever\*, AND ill OR illness. A total of 9323 articles were  
21 133 identified using these critical illness terms in the databases and an additional two articles were  
22 134 identified through hand-searching. Of these, 1126 articles were identified as duplicates and the  
23 135 remaining 8199 articles were screened by title and abstract review by two of the authors (TT and  
24 136 HM). 8168 articles were excluded as they did not concern critical illness, were not written in  
25 137 English or were not available in full text online, leaving 31 articles for inclusion for full-text  
26 138 review. In the full-text review, 22 articles were excluded as they did not define critical illness,  
27 139 and so nine articles were included in the analysis (Figure 1 and Supplementary Table 1).

28  
29  
30 140 Figure 1. Study Flow Chart

31  
32  
33  
34  
35  
36  
37  
38  
39  
40 141

### 142 **Critical Care**

143 The search strategy used the terms terminolog\*, etymolog\*, nomenclatur\*, OR definition\*, AND  
 144 critical care, intensive care, emergency care, OR acute care. A total of 7286 articles were identified  
 145 using these critical care terms in the databases and an additional six articles were identified through  
 146 hand-searching. Of these, 1964 were identified as duplicates and the remaining 5322 articles were  
 147 screened by title and abstract review by two of the authors (TT and HM). 5269 articles were  
 148 excluded as they were not concerning critical care, not written in English or not available in full  
 149 text online, leaving 59 articles for inclusion for full-text review. In the full-text review, 46 articles  
 150 were excluded as they did not define critical care and so 13 articles were included in the analysis  
 151 (Figure 1 and Supplementary Table 2).

### 152 **Expert survey**

153 The survey used open-ended questions to gather information about the experts' definitions of  
 154 critical illness and critical care, and how they see the relationship of the concepts to connected  
 155 concepts in order to provide context. The survey included the questions: i. *How would you define*  
 156 *critical illness?*, ii. *How would you define critical care?*, iii. *Do critical care and intensive care*  
 157 *differ? If yes, in what way?* iv. *Do critical care and emergency care differ and if yes, in what way?*  
 158 v. *Do critical care and acute care differ and if yes, in what way?*

159 The inclusion criterion for an expert to be invited to participate in the survey was experience in  
 160 any medical specialty that includes care of patients with acute, severe illness. Experts were  
 161 identified from a stakeholder mapping of global critical care done by one of the authors (TB,  
 162 unpublished), and those known to the researchers to be global experts in the field of critical care.  
 163 Purposive sampling was used to invite experts with the aim of including 100 experts with a balance  
 164 between specialties, geographical locations, health worker cadres and gender. In total 146 experts  
 165 were invited to take part, and 114 completed the survey (78% response rate) (Figure 1 and Table  
 166 1).

167 **Table 1: Characteristics of the experts who participated in the survey**

| Variable | Frequency (%) |
|----------|---------------|
| All      | 114           |
| Gender   |               |
| Male     | 80 (70.2)     |
| Female   | 34 (29.8)     |

|                            |           |
|----------------------------|-----------|
| Continent                  |           |
| Africa                     | 42 (36.8) |
| Europe                     | 29 (25.4) |
| North America              | 26 (22.8) |
| Asia                       | 12 (10.5) |
| South America              | 3 (2.6)   |
| Australia                  | 2 (1.8)   |
| Cadres*                    |           |
| Physician                  | 93 (53.1) |
| Researcher                 | 62 (35.4) |
| Nurse                      | 12 (6.9)  |
| Policy Maker               | 5 (2.9)   |
| Other                      | 3 (1.7)   |
| Specialty*                 |           |
| Anaesthesia/Intensive Care | 75 (59.1) |
| Emergency Care             | 20 (15.8) |
| Medicine                   | 12 (9.5)  |
| Paediatrics                | 7 (5.5)   |
| Surgery                    | 6 (4.7)   |
| Obstetrics and Gynaecology | 2 (1.6)   |
| Other                      | 5 (3.9)   |

168 \* As the experts were asked to select all that apply, the sum may exceed 100%

169

#### 170 **Step 4: Analysis and determining the defining attributes**

171 All the definitions and usages of critical illness and critical care from the scoping reviews and the  
 172 expert survey were charted and analysed using a content analysis based on methods developed by  
 173 Erlingsson & Brysiewicz.(13) First, the data from any parts of the literature and from the expert  
 174 survey that concerned the uses or definitions of the concepts were extracted. The data were coded,  
 175 and the codes analysed iteratively by the study team. Repeated and redundant codes were removed  
 176 and similar codes were arranged into categories. The data were revisited when new categories  
 177 arose or when diverse opinions with contrasting attributes were identified. Through the process,  
 178 themes emerged that captured the defining attributes of the concepts. Using the defining attributes,  
 179 definitions of the concepts were constructed by the research team to be coherent and useful.

180

#### 181 **Steps 5-8: presenting a model case, related and contrary cases, identifying antecedents and** 182 **consequences, and defining empirical referents**

183 The model cases, related, and contrary cases were developed by the researchers to provide  
 184 examples to illustrate the defining attributes of the concepts that emerged from the concept  
 185 analysis. Model cases were developed to be clinically realistic and to include all the defining

186 attributes. Related cases were developed that include some, but not all, of the defining attributes,  
 187 and contrary cases that are clearly “not the concept”, containing none of the defining attributes.  
 188 For simplicity in this study, we limited our cases to examples of patients with respiratory disease.  
 189 Antecedents and consequences were identified as events that occur prior to the occurrence of each  
 190 concept and as the outcomes of each concept respectively. Empirical referents were identified as  
 191 phenomena that demonstrate the occurrence of each concept “in real life”.

192 **Ethical considerations:** Informed consent was provided by all of the experts. The Research Ethics  
 193 Committee of the London School of Hygiene and Tropical Medicine approved the study  
 194 (Reference number 22661).

195 **Patient and Public Involvement:** No patient or public involvement in this study

## 196 Results

197 The results relate to steps 4-8 in the Walker and Avant approach, as steps 1-3 have been described  
 198 in the introduction and methods.

### 200 *Critical Illness*

#### 201 Step 4: The defining attributes

202 A total of 48 codes were identified from the uses and definitions of critical illness from the scoping  
 203 review and expert survey. The codes were analysed into 14 categories and 4 themes. (Table 2).  
 204 The themes represent the defining attributes of critical illness: *high risk of imminent death*; *vital*  
 205 *organ dysfunction*; *requirement for care to avoid death*; and *potential reversibility*. (Figure 2)

206 **Table 2. Content analysis for the concept *critical illness***

| Code                                                   | Category                     | Theme                              |
|--------------------------------------------------------|------------------------------|------------------------------------|
| Severe illness                                         | Severe illness               | <b>High risk of imminent death</b> |
| Process of increasing severity                         |                              |                                    |
| Imminent risk of death                                 | High risk of imminent death  |                                    |
| Enough severity to lead to death rapidly               |                              |                                    |
| Can kill within a short time                           |                              |                                    |
| Medical condition that results in short term mortality | Acute onset or deterioration |                                    |
| Sudden onset illness or acute deterioration            |                              |                                    |
| Acute life-threatening illness                         |                              |                                    |
| An episode of acute illness                            |                              |                                    |
| Increased risk of death                                |                              |                                    |

|                                                                                   |                                     |                                            |
|-----------------------------------------------------------------------------------|-------------------------------------|--------------------------------------------|
| Continuous threat to life and well-being                                          | Life-threatening                    |                                            |
| Life-threatening or potentially life-threatening disease                          |                                     |                                            |
| High probability of life-threatening deterioration                                |                                     |                                            |
| Acutely life-threatening injury or illness                                        |                                     |                                            |
| At least one and often multiple organ dysfunction                                 | Organ dysfunction or failure        | <b>Vital organ dysfunction</b>             |
| Failure in one or more organ systems that needs support                           |                                     |                                            |
| Hemodynamic instability, respiratory failure, seizure, disorders of consciousness |                                     |                                            |
| Diseases with vital organ failures as complications                               |                                     |                                            |
| Threatened organ failure                                                          | Threatened organ dysfunction        | <b>Vital organ dysfunction</b>             |
| Potential disturbances of vital organ functions                                   |                                     |                                            |
| Threatened end-organ damage                                                       |                                     |                                            |
| Deranged vital parameters                                                         | Vital signs derangements            |                                            |
| Physiologic reserve is diminished, as manifested by abnormal vital signs          |                                     |                                            |
| NEWS2 $\geq$ 7                                                                    |                                     |                                            |
| Associated with significant morbidities if untreated                              | Treatment needed to avoid death     |                                            |
| Decline in a patient's ability to survive on their own                            |                                     |                                            |
| Conditions requiring rapid intervention to avert death or disability              |                                     |                                            |
| An illness which without rapid treatment would result in death or disability.     |                                     |                                            |
| Needs prompt and sustained intervention to avert death or lifelong disability     |                                     |                                            |
| If no intervention is made, death is certain                                      | Requirement for immediate treatment | <b>Requirement for care to avoid death</b> |
| Requiring minute-by-minute nursing and/or medical care                            |                                     |                                            |
| Requires a rapid diagnosis and response to ensure good outcomes                   |                                     |                                            |
| Illnesses where timely care can reduce the chances of death and disability        |                                     |                                            |
| Requires immediate intervention                                                   |                                     |                                            |
| The illness needs close monitoring and prompt management                          | Requirement for organ support       |                                            |
| Treatment delays of hours or less make interventions less effective               |                                     |                                            |
| Requiring organ support                                                           |                                     |                                            |
| Requiring vital organ support                                                     | Requires critical care              |                                            |
| Requiring intensified patient monitoring and organ support                        |                                     |                                            |
| Critical care services                                                            |                                     |                                            |
| ICU admission                                                                     | Need for specific care              |                                            |
| Illness that results in need for more than standard of care                       |                                     |                                            |
| Acute disease that needs specific treatment alongside the disease itself          |                                     |                                            |
| Some element of treatability                                                      | Reversible with treatment           |                                            |
| Any treatable life-threatening reversible illness                                 |                                     |                                            |
| Reversible life-threatening organ failure                                         | Potentially reversible              | <b>Potential reversibility</b>             |
| Life-threatening situation, illness or disease that is potentially reversible     |                                     |                                            |
| Acute potentially reversible illness                                              |                                     |                                            |

207

## 208 **Figure 2. The defining attributes of critical Illness**

### 209 **Proposed operational definition**

210 The proposed definition for critical illness is “*Critical illness is a state of ill health with vital organ*  
 211 *dysfunction, a high risk of imminent death if care is not provided and the potential for*  
 212 *reversibility.*”

### 213 **Cases**

#### 214 **Step 5: A model case of critical illness (a case including all the defining attributes)**

1  
2  
3 215 A woman has a viral pneumonia. She is breathless and hypoxic with a low oxygen level in her  
4 216 blood (oxygen saturation) of 74%. Her lungs are dysfunctional, and she has a life-threatening  
5 217 condition that is likely to lead to her death in the next few hours. She requires care to support her  
6 218 lungs (oxygen therapy) and if she receives that care, she has a chance of recovery.  
7  
8  
9

10  
11 219 **Step 6: A related case for critical illness (a case including some of the defining attributes but**  
12 220 **not the attribute of “imminently life-threatening”)**  
13

14 221 A man has a chest infection. He has a fever, is coughing up green sputum and feels short-of-breath  
15 222 when walking. He has an oxygen saturation of 91%. He has a serious condition, but it is not  
16 223 imminently life-threatening. He requires treatment, likely with antibiotics, but it is uncertain  
17 224 whether he requires any organ support such as oxygen. His condition is potentially reversible, and  
18 225 he can recover.  
19  
20  
21  
22

23 226 **A contrary case for critical illness (a clear example of “not the concept”)**  
24

25 227 A woman has lung cancer. She is coughing up small amounts of blood but is able to walk to the  
26 228 hospital. She has an oxygen saturation of 94%. She is sick and she requires treatment. However,  
27 229 her illness is not imminently life-threatening, she has no dysfunctional vital organ and she does  
28 230 not require immediate care. Her condition may or may not be reversible.  
29  
30  
31  
32

33 231 **Step 7: Antecedents and consequences of Critical Illness**  
34

35 232 The antecedents of critical illness are the onset of illness, in mild or moderate form, with  
36 233 progressing severity. The consequences of critical illness are either recovery or death.  
37  
38

39 234 **Step 8: Empirical Referents**  
40

41 235 There are an estimated 30-45 million cases of critical illness globally each year(1). Many patients  
42 236 are cared for in hospitals with illnesses that are causing vital organ dysfunction and that are  
43 237 imminently life-threatening. There is much work done to identify patients with critical illness such  
44 238 as the use of single severely deranged vital signs(14), or compound scoring systems such as the  
45 239 National Early Warning Score (NEWS) and The Sequential Organ Failure Assessment score  
46 240 (SOFA) (15,16) . In hospitals, the severity of patients’ conditions can be assessed using tools such  
47 241 as the Acute Physiology and Chronic Health Evaluation (APACHE)(17) and the Simplified Acute  
48 242 Physiology Score (SAPS)(18).  
49  
50  
51  
52  
53  
54  
55  
56  
57  
58  
59  
60

243

244 **Critical Care**245 **Step 4: The defining attributes**

246 A total of 60 codes were identified from the definitions of critical care from the scoping review  
 247 and expert survey. The codes were analysed into 13 categories and 5 themes. (Table 3) The themes  
 248 represent the concept's defining attributes: *identification, monitoring, and treatment of critical*  
 249 *illness; vital organ support; initial and sustained care; any care of critical illness; and specialized*  
 250 *human and physical resources.* (Figure 3)

251 **Table 3: Content analysis for the concept *critical care***

| Codes                                                                                                                     | Category                                                                     | Theme                                                                |                                     |
|---------------------------------------------------------------------------------------------------------------------------|------------------------------------------------------------------------------|----------------------------------------------------------------------|-------------------------------------|
| Identifying and addressing critical illness                                                                               | Identification and monitoring of critical illness                            | <b>Identification, monitoring, and treatment of critical illness</b> |                                     |
| Medical care with timely monitoring                                                                                       |                                                                              |                                                                      |                                     |
| Appropriate monitoring of critical illness                                                                                |                                                                              |                                                                      |                                     |
| Management of critically ill patients                                                                                     | Treatment of critical illness                                                |                                                                      |                                     |
| Treat critical illness                                                                                                    |                                                                              |                                                                      |                                     |
| Care given to the critically ill                                                                                          |                                                                              |                                                                      |                                     |
| Services required to stabilize critical illness                                                                           |                                                                              |                                                                      |                                     |
| Reduce the risk of death from a critical illness                                                                          |                                                                              |                                                                      |                                     |
| Care dedicated to patients with severe illness or potentially severe condition                                            | Addressing life-threatening condition                                        |                                                                      |                                     |
| Managing life-threatening condition                                                                                       |                                                                              |                                                                      |                                     |
| Preventing the occurrence of life-threatening conditions                                                                  |                                                                              |                                                                      |                                     |
| Treatment and management due to the threat of imminent deterioration                                                      | Supporting vital functions                                                   |                                                                      | <b>Vital organ support</b>          |
| Medical care required to reduce the risk to the patient's life                                                            |                                                                              |                                                                      |                                     |
| Care to sustain cardiopulmonary functions                                                                                 |                                                                              |                                                                      |                                     |
| Support the patient's hemodynamic or cardiorespiratory status                                                             |                                                                              |                                                                      |                                     |
| Supportive care in critical illness to enable body's systems to continue functioning before definitive treatment can work |                                                                              |                                                                      |                                     |
| Care of vital organ failure                                                                                               |                                                                              |                                                                      |                                     |
| Focus of care on supporting vital organs until improvement                                                                |                                                                              |                                                                      |                                     |
| Providing organ support                                                                                                   | Organ support                                                                |                                                                      |                                     |
| Main focus on organ-supporting treatment.                                                                                 |                                                                              |                                                                      |                                     |
| Support of vital organ function, or reverse specific organ dysfunctions                                                   |                                                                              |                                                                      |                                     |
| Supportive care for organs that are failing                                                                               |                                                                              |                                                                      |                                     |
| Provision of support to dysfunctional body systems                                                                        |                                                                              |                                                                      |                                     |
| Early management for saving and maintaining life                                                                          | Timely care                                                                  | <b>Initial and sustained care</b>                                    |                                     |
| Rapid and timely intervention that is administered in critical illness                                                    |                                                                              |                                                                      |                                     |
| From admission until the course of illness ends, either in full recovery or death                                         | From start of critical illness until the patient is no longer critically ill |                                                                      |                                     |
| From home through to discharge from hospital                                                                              |                                                                              |                                                                      |                                     |
| From the time of first contact with healthcare services through to stabilization                                          |                                                                              |                                                                      |                                     |
| To the point where the illness or injury is no longer acutely life-threatening                                            | Sustained care                                                               |                                                                      |                                     |
| Critical care could be over days to weeks                                                                                 |                                                                              |                                                                      |                                     |
| Constant monitoring                                                                                                       |                                                                              |                                                                      |                                     |
| Irrespective of the location of the patient within the health system                                                      | Any location                                                                 |                                                                      | <b>Any care of critical illness</b> |
| Anywhere in the emergency or inpatient setting                                                                            |                                                                              |                                                                      |                                     |
| Any care provided to critically ill patients                                                                              |                                                                              |                                                                      |                                     |

|                                                                                                        |                                         |                                                 |
|--------------------------------------------------------------------------------------------------------|-----------------------------------------|-------------------------------------------------|
| Can be specialized care but depends on the level of resources                                          | Any care provided to                    | <b>Specialized human and physical resources</b> |
| Usually located in an area with infrastructure to support these activities                             | Specific area                           |                                                 |
| Inside a healthcare facility, outside the emergency department                                         |                                         |                                                 |
| High dependency care                                                                                   |                                         |                                                 |
| Care in ICU or Critical care unit                                                                      |                                         |                                                 |
| A place where equipment, staff and environment is ready to save patients with life-threatening disease |                                         |                                                 |
| Multidisciplinary care                                                                                 | Multi-disciplinary and specialist staff |                                                 |
| Specially trained staff                                                                                |                                         |                                                 |
| Essentially a team-based and multi-professional care                                                   |                                         |                                                 |
| Requires the grouping of special facilities and specially trained staff                                | High-intensity care                     |                                                 |
| Higher level of care than is available on a general ward                                               |                                         |                                                 |
| Minute-by-minute nursing and/or medical care                                                           |                                         |                                                 |
| Advanced respiratory support / mechanical ventilation                                                  |                                         |                                                 |
| Nursing 24/7                                                                                           |                                         |                                                 |
| High nurse: patient ratio no lower than 1:2                                                            |                                         |                                                 |

252

### 253 **Figure 3. Defining attributes of critical care**

#### 254 **Proposed operational definition of *Critical care***

255 The proposed definition for critical care is “*Critical care is the identification, monitoring, and*  
 256 *treatment of patients with critical illness through the initial and sustained support of vital organ*  
 257 *functions.*”

#### 258 ***Cases***

##### 259 **Step 5: A model case of critical care (a case including all the defining attributes)**

260 A woman with a viral pneumonia is rapidly identified as critically ill when she arrives at the  
 261 hospital. She is immediately admitted to a unit with supplies for managing critically ill patients  
 262 and treatment is started. Nurses and doctors who have been trained in the care of critical illness  
 263 monitor her regularly, and provide continuous care, titrating the treatments as needed. Continuous  
 264 oxygen therapy is provided for her life-threatening hypoxia, supporting her respiratory  
 265 dysfunction, until she has recovered and is no longer critically ill.

##### 266 **Step 6: A related case of critical care (a case including some of the defining attributes but not the attribute of “vital organ support”)**

268 Care in a hospital is provided to a man with a chest infection. A nurse assesses him at arrival to  
 269 hospital. A doctor admits him to the ward, prescribes antibiotics and decides he is not critically ill  
 270 and does not require support for any of his vital organs. After four days the doctor discharges him  
 271 from hospital.



1  
2  
3 272 **A contrary case of critical care (a clear example of “not the concept”)**  
4

5 273 In the outpatient department, care is provided to a woman with lung cancer. A doctor and a nurse  
6  
7 274 do some investigations and prescribe some medications. She is sent home with a follow-up  
8  
9 275 appointment two weeks later.

10  
11 276 **Step 7: Antecedents and consequences of critical care**  
12

13 277 The antecedents of critical care are the contact of the patient with the healthcare system and may  
14  
15 278 include other care of a patient who has not deteriorated to the point of becoming critically ill. The  
16  
17 279 consequences of critical care are either the patient’s recovery or death.  
18

19 280 **Step 8: Empirical Referents**  
20

21 281 Many hospitals have wards or units for the provision of critical care, such as Emergency Units,  
22  
23 282 High Dependency Units or Intensive Care Units (ICUs) (19). Critical care can also be provided in  
24  
25 283 general wards, and a recent global consensus specified the care that should be included for all  
26  
27 284 patients with critical illness in any hospital location(20). Rapid Response Teams or Medical  
28  
29 285 Emergency Teams have been introduced into some hospitals, often consisting of staff from the  
30  
31 286 ICU responding to calls from the wards when a critically ill patient has been identified, and  
32  
33 287 providing either critical care on the ward, or transferring the patient to the ICU (21).  
34

35 288

36 289 **Discussion**  
37

38  
39 290 We have described how the concepts *critical illness* and *critical care* are used and defined in the  
40  
41 291 literature and by a selection of global experts using a concept analysis approach.  
42

43 292 Our proposed definition for critical illness of, “*a state of ill health with vital organ dysfunction, a*  
44  
45 293 *high risk of imminent death if care is not provided and the potential for reversibility*”, is similar to  
46  
47 294 those in some key publications. Chandrashekar et al state that, “*Critical illness is any condition*  
48  
49 295 *requiring support of failing vital organ systems without which survival would not be possible*”  
50  
51 296 (22) . Painter et al write that, “*A critically ill or injured patient is defined as one who has an*  
52  
53 297 *illness or injury impairing one or more vital organ systems such that there is a high probability of*  
54  
55 298 *imminent or life-threatening deterioration in the patient's condition*”(23) . Indeed, we found  
56  
57  
58  
59  
60

1  
2  
3 299 widespread agreement in the literature and expert sources that critical illness concerns the  
4 300 attributes “life-threatening illness” and “organ dysfunction”.

7 301 However, we found diverse and varied usage of the concept concerning the attribute of reversibility  
8 302 and the interface between critical illness and the natural process of dying. Some uses included only  
9 303 illness that was potentially reversible – these sources regarded that for critical illness there should  
10 304 be a possible chance of recovery. Without this, critical illness would be a concept that encompasses  
11 305 the dying process – everyone would be critically ill immediately before death – which would  
12 306 conflict with many clinical uses and understandings of the term. Others had a wider interpretation  
13 307 including all life-threatening illness and did not include reversibility in the definition as it is  
14 308 difficult to identify in the clinical setting, and the concept risks becoming context dependent, (high-  
15 309 resource interventions may reverse some critical illness which would not be possible in low-  
16 310 resource healthcare). Our iterative content analysis method led to our interpretation that  
17 311 reversibility should be included as one of the defining attributes. This conclusion should be seen  
18 312 as one possible interpretation that can stimulate further discussion.

28 313 It is hoped that the proposed definition of critical illness assists communication in the field.  
29 314 Previously, studies about critical illness have focused on patients in certain hospital units, or with  
30 315 diseases or syndromes as proxies for critical illness that exclude some critically ill patients.(1)  
31 316 Our definition of critical illness is not diagnosis or syndrome specific and can be due to any  
32 317 underlying condition. The definition could facilitate the specification of clinical criteria for the  
33 318 identification of critical illness, estimates of the overall burden of critical illness, assessments of  
34 319 outcomes for patients with critical illness across centres and settings, and interventions to improve  
35 320 outcomes.

43 321 For critical care, there was greater diversity around its use and definition. There was widespread  
44 322 agreement that critical care included the attributes of, “care of critically ill patients”, and the  
45 323 “support of vital organs”. However, there were differing uses around the location of the care and  
46 324 the need for specialized resources. Some sources considered critical care to be only the care  
47 325 provided in certain locations, (such as ICUs or critical care units), or to be care that is always  
48 326 highly specialized or resource intensive. The World Federation of Societies of Intensive and  
49 327 Critical Care Medicine have suggested that critical care is synonymous with intensive care and is,  
50 328 “*a multidisciplinary and interprofessional specialty dedicated to the comprehensive management*

1  
2  
3 329 of patients having, or at risk of developing, acute, life-threatening organ dysfunction. [Critical  
4 330 care] uses an array of technologies that provide support of failing organ systems, particularly the  
5 331 lungs, cardiovascular system, and kidneys.”(19) In contrast, other sources used critical care to  
6  
7 332 be inclusive of any care for patients with critical illness, irrespective of location or resources. The  
8  
9 333 Joint Faculty of Intensive Care Medicine of Ireland state that critical care units are those that,  
10 334 “provide life sustaining treatment for critically ill patients with acute organ dysfunction due to  
11  
12 335 potentially reversible disease”,(24) and in Belgium, critical care beds have been defined as any  
13  
14 336 beds “for patients with one or more organ functions compromised”(3) Hirshon et al strike a  
15  
16 337 balance between these two contrasting views, “[Critical care is] the specialized care of patients  
17  
18 338 whose conditions are life-threatening and who require comprehensive care and constant  
19  
20 339 monitoring, usually in intensive care units.” (25)  
21  
22

23 340 Our proposed definition of, “the identification, monitoring, and treatment of patients with critical  
24  
25 341 illness through the initial and sustained support of vital organ functions”, aims to be inclusive.  
26  
27 342 Critical care may include the use of specialized resources, but it is not a requirement. We see this  
28  
29 343 as a strength in the definition, as it maintains a patient-centred rather than setting-dependent focus.  
30  
31 344 Critical care when defined in this way can be provided anywhere, and does not have to be resource-  
32  
33 345 intensive – it includes both high-resource care in ICUs and lower resource care in other settings.  
34  
35 346 Indeed, critical care can be provided in general wards, in small health facilities, in the community  
36  
37 347 or in ambulances. High-resource intensive care may not be possible in low-resource settings, but  
38  
39 348 such settings care for many critically ill patients who require critical care(5,26,27). The definition  
40  
41 349 focuses on supporting vital organ functions, emphasising that critical care’s primary focus is  
42  
43 350 treating the critical condition of the patient rather than definitive care for the underlying  
44  
45 351 condition(28,29). Critical care, as we have defined it, can be seen as a system of care of patients  
46  
47 352 with critical illness throughout the course of their illness, from the time of their first contact with  
48  
49 353 healthcare through to resolution of the critical illness or death. Critical care is part of the wider  
50  
51 354 concept of acute care which also includes prehospital care, emergency care, trauma and surgery  
52  
53 355 care, as well as in-patient care in medical, surgical, pediatric, obstetric and other wards(25).  
54  
55

56 356 The word “crisis” is the root for the word critical and has its origin from the Greek word “krisis”  
57  
58 357 referring to a “turning point” or “act of separation”, and later in English in a medical context when  
59  
60 358 a crisis refers to the decisive point at which a patient either improves or deteriorates.(30)The

1  
2  
3 359 concepts critical illness and critical care could be regarded as remaining true to these origins as  
4  
5 360 they refer to the point in a patient's "journey" through their illness where they are so severely ill  
6  
7 361 that the situation has become a crisis, and managing the crisis is necessary to direct the patient  
8  
9 362 towards improvement rather than towards deterioration.

### 11 363 **Strengths and Limitations**

14 364 To our knowledge, this is the first study attempting to describe the uses and definitions of the  
15  
16 365 concepts *critical illness* and *critical care*, and to identify the defining attributes leading to proposed  
17  
18 366 definitions of the concepts. A strength is the use of both a scoping review of the literature and the  
19  
20 367 inclusion of over one hundred clinical experts as sources. The findings of the analysis should be  
21  
22 368 seen as a first step towards consensus and we recognise that the use of concepts is fluid and changes  
23  
24 369 over time (7). We were limited to including literature in English and to published studies and  
25  
26 370 guidelines and we may have missed relevant publications in other languages or in other grey  
27  
28 371 literature. Our sample of experts was purposively selected and had global representation but was  
29  
30 372 not perfectly symmetrical to continents, specialty, cadre or gender. There are many more experts  
31  
32 373 than we were able to include, and we are likely to have missed experts who could have provided  
33  
34 374 valuable contributions. We acknowledge that the proposed definitions are due to one possible  
35  
36 375 interpretation of the data and may not be universally accepted. We hope our analysis and findings  
37  
38 376 move the conversation forwards, providing input about how to communicate and collaborate  
39  
40 377 around these vitally important concepts, and ultimately how to improve the care and outcomes for  
41  
42 378 critically ill patients.

41 379

### 43 380 **Conclusion**

45 381 The concepts critical illness and critical care lack consensus definitions and have varied uses.  
46  
47 382 Through concept analysis of the uses in the literature and among experts we propose possible  
48  
49 383 definitions for the concepts: "*Critical illness is a state of ill health with vital organ dysfunction, a*  
50  
51 384 *high risk of imminent death if care is not provided and the potential for reversibility*" and "*Critical*  
52  
53 385 *care is the identification, monitoring, and treatment of patients with critical illness through the*  
54  
55 386 *initial and sustained support of vital organ functions.*"

1  
2  
3 387 **Figure 1: Study Flowchart**  
4

5 388 **Figure 2 : The defining attributes of critical illness**  
6

7  
8 389 **Figure 3: The defining attributes of critical care**  
9

10 390

11  
12 391  
13

14 392  
15

16  
17 393  
18

19 394 **Acknowledgements:** We thank all the experts who participated in the study.  
20

21 395 **Author Contributions:** Tim Baker & Carl Otto Schell designed the study. Raphael Kazidule  
22 396 Kayambankadzanja, Thomas Tamras, Hedi Mollazedagan and Tim Baker collected the data. Helle  
23 397 Mølsted Alvesson, Mats Holmberg, and Martin Gerdin Wärnberg contributed to analysing the data.  
24 398 RKK and TB wrote the first draft of the manuscript. All authors critically reviewed the manuscript  
25 399 and approved the final version. The corresponding author attests that all listed authors meet  
26 400 authorship criteria and that no others meeting the criteria have been omitted.  
27

28 401 **Funding:** This research received no specific grant from any funding agency in the public,  
29 402 commercial or not-for-profit sectors  
30

31 403 **Disclaimer:** We confirm the independence of researchers and that all authors in study can take  
32 404 responsibility for the integrity of the data and the accuracy of the data analysis.  
33

34 405 **Competing Interests:** None Declared  
35

36 406 **Patient Consent for Publication:** Not required  
37

38 407 **Ethics Approval:** The Research Ethics Committee of the London School of Hygiene and Tropical  
39 408 Medicine approved the study (Reference number 22661).  
40

41 409 **Provenance and Peer Review:** Not commissioned, externally reviewed  
42

43 410 **Data Availability Statement:** The study data are available from the corresponding author on  
44 411 reasonable request  
45

1  
2  
3 412 **Supplementary Files:** Supplementary Tables 1 and 2  
4  
5  
6 413  
7

8 414 **References**

- 9  
10 415 1. Adhikari NK, Fowler RA, Bhagwanjee S, Rubenfeld GD. Critical care and the global burden of  
11 416 critical illness in adults. *The Lancet*. 2010 Oct;376(9749).
- 12  
13 417 2. Vukoja M, Riviello ED, Schultz MJ. Critical care outcomes in resource-limited settings. *Current*  
14 418 *Opinion in Critical Care*. 2018 Oct;24(5):421–7.
- 15  
16 419 3. Wunsch H, Angus DC, Harrison DA, Collange O, Fowler R, Hoste EAJ, et al. Variation in critical care  
17 420 services across North America and Western Europe\*. *Critical Care Medicine*. 2008  
18 421 Oct;36(10):2787-e8.
- 19  
20 422 4. Biccard BM, Gopalan PD, Miller M, Michell WL, Thomson D, Ademuyiwa A, et al. Patient care and  
21 423 clinical outcomes for patients with COVID-19 infection admitted to African high-care or intensive  
22 424 care units (ACCCOS): a multicentre, prospective, observational cohort study. *The Lancet*. 2021  
23 425 May;397(10288):1885–94.
- 24  
25 426 5. Murthy S, Leligdowicz A, Adhikari NKJ. Intensive Care Unit Capacity in Low-Income Countries: A  
26 427 Systematic Review. *PLOS ONE*. 2015 Jan 24;10(1):e0116949.
- 28  
29 428 6. Arabi YM, Azoulay E, Al-Dorzi HM, Phua J, Salluh J, Binnie A, et al. How the COVID-19 pandemic  
30 429 will change the future of critical care. *Intensive Care Medicine*. 2021 Mar 22;47(3):282–91.
- 31  
32 430 7. Walker LO, Avant KC. *Strategies for Theory Construction in Nursing*. 5th Edition. Pearson; 2011.
- 33  
34 431 8. Xyrichis A, Ream E. Teamwork: A concept analysis. *Journal of Advanced Nursing*. 2008  
35 432 Jan;61(2):232–41.
- 36  
37 433 9. Allvin R, Berg K, Idvall E, Nilsson U. Postoperative recovery: a concept analysis. *Journal of*  
38 434 *Advanced Nursing*. 2007 Mar;57(5).
- 39  
40 435 10. Rebmann T. Defining bioterrorism preparedness for nurses: concept analysis. *Journal of*  
41 436 *Advanced Nursing*. 2006 Jun;54(5).
- 42  
43 437 11. Arksey H, O'Malley L. Scoping studies: towards a methodological framework. *International*  
44 438 *Journal of Social Research Methodology*. 2005 Feb;8(1).
- 45  
46 439 12. Ouzzani M, Hammady H, Fedorowicz Z, Elmagarmid A. Rayyan—a web and mobile app for  
47 440 systematic reviews. *Systematic Reviews*. 2016 Dec 5;5(1).
- 48  
49 441 13. Erlingsson C, Brysiewicz P. A hands-on guide to doing content analysis. *African Journal of*  
50 442 *Emergency Medicine*. 2017 Sep;7(3).
- 51  
52 443 14. Schell CO, Castegren M, Lugazia E, Blixt J, Mulungu M, Konrad D, et al. Severely deranged vital  
53 444 signs as triggers for acute treatment modifications on an intensive care unit in a low-income  
54 445 country. *BMC Research Notes*. 2015 Dec 25;8(1).

- 1  
2  
3 446 15. Seymour CW, Liu VX, Iwashyna TJ, Brunkhorst FM, Rea TD, Scherag A, et al. Assessment of Clinical  
4 447 Criteria for Sepsis. *JAMA*. 2016 Feb 23;315(8).
- 6 448 16. Smith GB, Redfern OC, Pimentel MA, Gerry S, Collins GS, Malycha J, et al. The National Early  
7 449 Warning Score 2 (NEWS2). *Clinical Medicine*. 2019 May 15;19(3).
- 9 450 17. Knaus WA DEWDZJ. APACHE II: a severity of disease classification system. *Critical Care Medicine*.  
10 451 *Critical Care Medicine*. 1985;
- 12 452 18. Moreno RP, Metnitz PGH, Almeida E, Jordan B, Bauer P, Campos RA, et al. SAPS 3 - From  
13 453 evaluation of the patient to evaluation of the intensive care unit. Part 2: Development of a  
14 454 prognostic model for hospital mortality at ICU admission. *Intensive Care Medicine*.  
15 455 2005;31(10):1345–55.
- 18 456 19. Marshall JC, Bosco L, Adhikari NK, Connolly B, Diaz J v., Dorman T, et al. What is an intensive care  
19 457 unit? A report of the task force of the World Federation of Societies of Intensive and Critical Care  
20 458 Medicine. *Journal of Critical Care*. 2017 Feb;37:270–6.
- 22 459 20. Schell CO, Khalid K, Wharton-Smith A, Oliwa J, Sawe HR, Roy N, et al. Essential Emergency and  
23 460 Critical Care: a consensus among global clinical experts. *BMJ Global Health*. 2021 Sep 21;6(9).
- 25 461 21. Maharaj R, Raffaele I, Wendon J. Rapid response systems: a systematic review and meta-analysis.  
26 462 2015;
- 28 463 22. Chandrashekar M, Shivaraj BM, Krishna VP. A study on prognostic value of serum cortisol in  
29 464 determining the outcome in the critically ill patients. *Journal of Evolution of Medical and Dental  
30 465 Sciences*. 2015 Jul 17;4(58).
- 32 466 23. Painter JR. Critical Care in the Surgical Global Period. *Chest*. 2013 Mar;143(3).
- 34 467 24. Joint Faculty of Intensive Care Medicine of Ireland. National Standards for Adult Critical Care  
35 468 Services 2011. 2011.
- 37 469 25. Hirshon JM, Risko N, Calvillo EJ, Stewart de Ramirez S, Narayan M, Theodosios C, et al. Health  
38 470 systems and services: the role of acute care. *Bull World Health Organ*. 2013/05/17.  
39 471 2013;91(5):386–8.
- 42 472 26. Prin M, Wunsch H. International comparisons of intensive care. *Current Opinion in Critical Care*.  
43 473 2012 Dec;18(6):700–6.
- 45 474 27. Manda-Taylor L, Mndolo S, Baker T. Critical care in Malawi: The ethics of beneficence and justice.  
46 475 *Malawi Medical Journal*. 2017 Nov 24;29(3):268.
- 48 476 28. Schell CO, Gerdin Wärnberg M, Hvarfner A, Höög A, Baker U, Castegren M, et al. The global need  
49 477 for essential emergency and critical care. Vol. 22, *Critical Care*. BioMed Central Ltd.; 2018.
- 51 478 29. Baker T, Schell CO, Petersen DB, Sawe H, Khalid K, Mndolo S, et al. Essential care of critical illness  
52 479 must not be forgotten in the COVID-19 pandemic. *The Lancet*. 2020 Apr;395(10232).
- 54 480 30. Merriam-Webster. Merriam Webster Dictionary [Internet]. 2022 [cited 2022 Apr 11]. Available  
55 481 from: <https://www.merriam-webster.com/dictionary/crisis>

1  
2  
3  
4  
5  
6  
7  
8  
9  
10  
11  
12  
13  
14  
15  
16  
17  
18  
19  
20  
21  
22  
23  
24  
25  
26  
27  
28  
29  
30  
31  
32  
33  
34  
35  
36  
37  
38  
39  
40  
41  
42  
43  
44  
45  
46  
47  
48  
49  
50  
51  
52  
53  
54  
55  
56  
57  
58  
59  
60

482

For peer review only



Figure 1: Study Flowchart

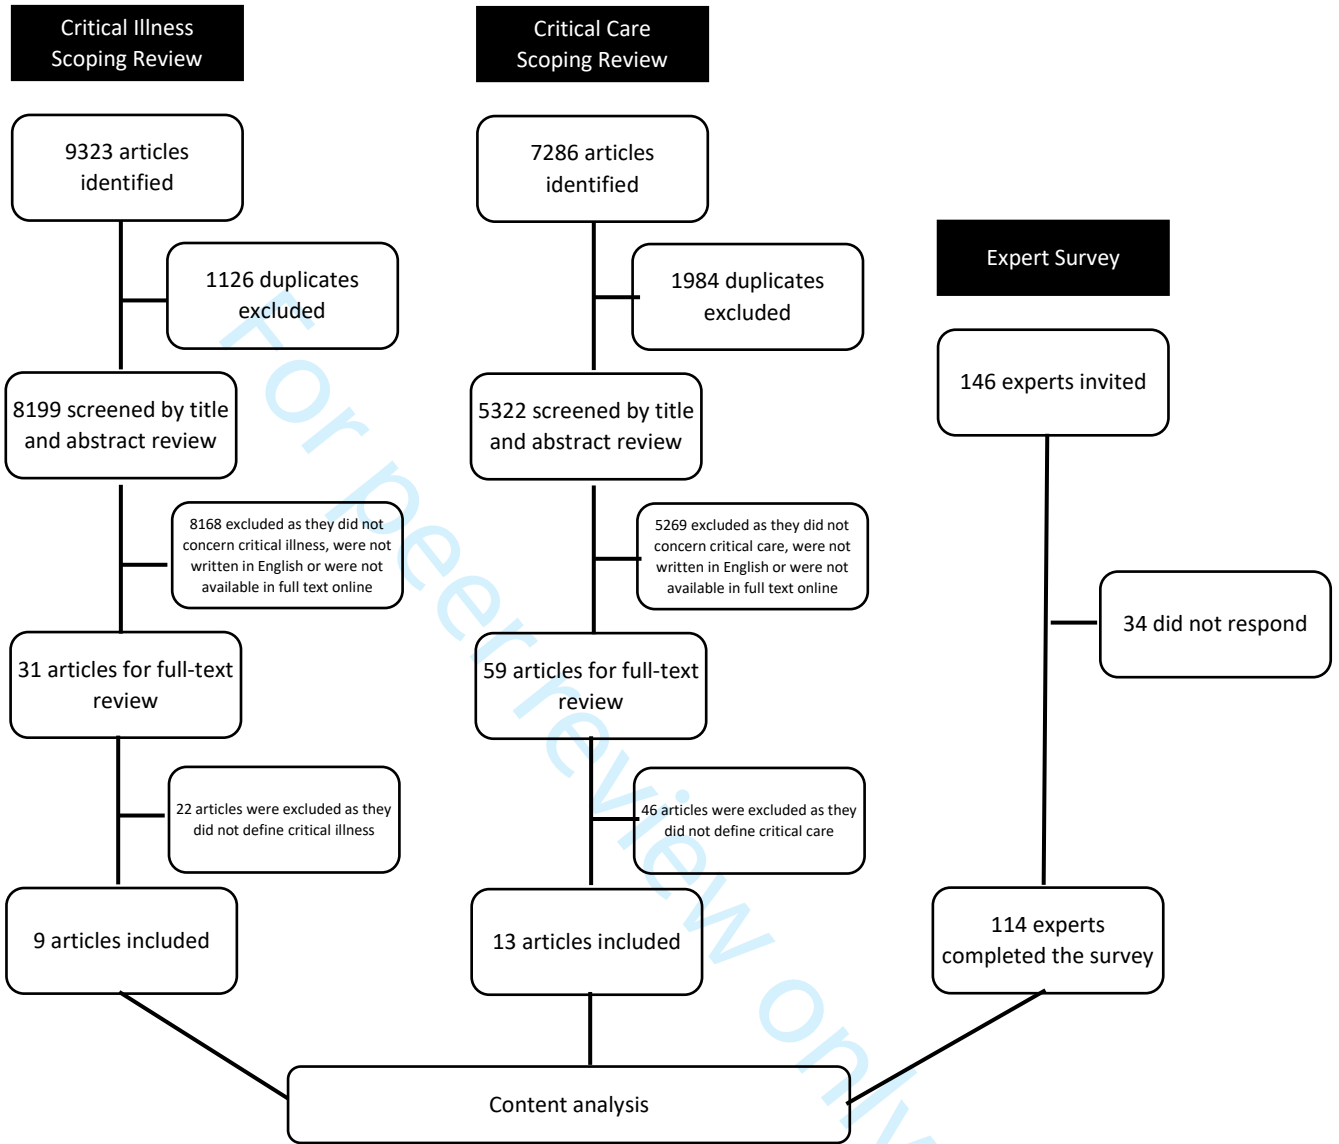

1  
2  
3  
4  
5  
6  
7  
8  
9  
10  
11  
12  
13  
14  
15  
16  
17  
18  
19  
20  
21  
22  
23  
24  
25  
26  
27  
28  
29  
30  
31  
32  
33  
34  
35  
36  
37  
38  
39  
40  
41  
42  
43  
44  
45  
46  
47  
48  
49  
50  
51  
52  
53  
54  
55  
56  
57  
58  
59  
60

For peer review only

1  
2  
3 **Figure 2: The defining attributes of critical illness**  
4

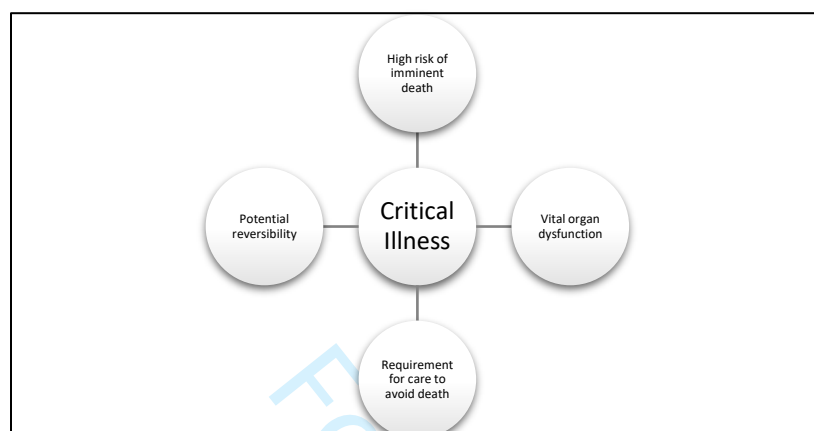

1  
2  
3  
4  
5  
6  
7  
8  
9  
10  
11  
12  
13  
14  
15  
16  
17  
18  
19  
20  
21  
22  
23  
24  
25  
26  
27  
28  
29  
30  
31  
32  
33  
34  
35  
36  
37  
38  
39  
40  
41  
42  
43  
44  
45  
46  
47  
48  
49  
50  
51  
52  
53  
54  
55  
56  
57  
58  
59  
60

**Figure 3: The defining attributes of critical care**

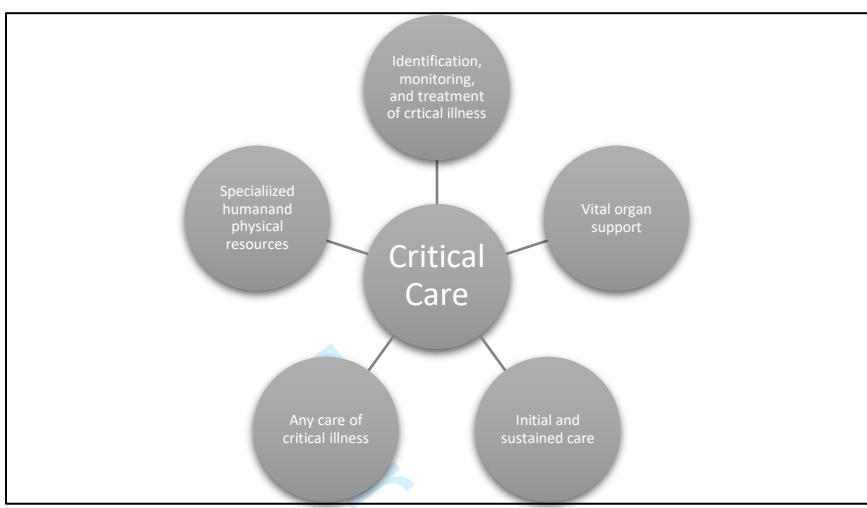

peer review only

**Supplementary Table 1 Literature with definitions of critical illness**

|   | <b>First Author and Publication Date</b> | <b>Country</b> | <b>Reference</b>                                                                                                                                                                                                                              |
|---|------------------------------------------|----------------|-----------------------------------------------------------------------------------------------------------------------------------------------------------------------------------------------------------------------------------------------|
| 1 | Kievlan 2016                             | United States  | Kievlan DR, Martin-Gill C, Kahn JM, Callaway CW, Yealy DM, Angus DC, et al. External validation of a prehospital risk score for critical illness. <i>Crit Care</i> . 2016;20(1):255.                                                          |
| 2 | Warttig 2018                             | United Kingdom | Warttig S, Alderson P, Evans DJW, Lewis SR, Kourbeti IS, Smith AF. Automated monitoring compared to standard care for the early detection of sepsis in critically ill patients (Review). <i>Cochrane Database of Syst Rev</i> . 2018(6):28.   |
| 3 | Rodriguez 2018                           | United States  | Rodriguez RM, Greenwood JC, Nuckton TJ, Darger B, Shofer FS, Troeger D, et al. Comparison of qSOFA with current emergency department tools for screening of patients with sepsis for critical illness. <i>Emerg Med J</i> . 2018;35(6):350-6. |
| 4 | Benneyworth 2015                         | United States  | Benneyworth BD, Bennett WE, Carroll AE. Cross-sectional comparison of critically ill pediatric patients across hospitals with various levels of pediatric care. <i>BMC Res Notes</i> . 2015;8:693.                                            |
| 5 | Hsu 2016                                 | Taiwan         | Hsu CW, Lin CS, Chen SJ, Lin SH, Lin CL, Kao CH. Risk of type 2 diabetes mellitus in patients with acute critical illness: a population-based cohort study. <i>Intensive Care Med</i> . 2016;42(1):38-45.                                     |
| 6 | Painter 2013                             | United States  | Painter JR. Critical Care in the Surgical Global Period. <i>Chest</i> . 2013;143(3):851-5.                                                                                                                                                    |
| 7 | Chandrashekar 2015                       | India          | Chandrashekar M, Shivaraj BM, Krishna VP. A study on prognostic value of serum cortisol in determining the outcome in the critically ill patients. <i>JEMDS</i> . 2015;4(58):10130-5.                                                         |
| 8 | Liao 2014                                | United States  | Liao MM, Lezotte D, Lowenstein SR, Howard K, Finley Z, Feng ZP, et al. Sensitivity of systemic inflammatory response syndrome for critical illness among ED patients. <i>Am J of Emerg Med</i> . 2014;32(11):1319-25.                         |
| 9 | Valentin 2011                            | 23 countries   | Valentin A, Ferdinande P, Improvem EWGQ. Recommendations on basic requirements for intensive care units: structural and organizational aspects. <i>Intensive Care Med</i> . 2011;37(10):1575-87.                                              |

1  
2  
3  
4  
5  
6  
7  
8  
9  
10  
11  
12  
13  
14  
15  
16  
17  
18  
19  
20  
21  
22  
23  
24  
25  
26  
27  
28  
29  
30  
31  
32  
33  
34  
35  
36  
37  
38  
39  
40  
41  
42  
43  
44  
45  
46

For peer review only

Supplementary Table 2 Literature with definitions of critical care

|    | First Author and Publication Date                                                              | Country                                    | Reference                                                                                                                                                                                                                                                                |
|----|------------------------------------------------------------------------------------------------|--------------------------------------------|--------------------------------------------------------------------------------------------------------------------------------------------------------------------------------------------------------------------------------------------------------------------------|
| 1  | Wunsch 2008                                                                                    | United States, France, UK, Canada, Belgium | Wunsch H, Angus DC, Harrison DA, Collange O, Fowler R, Hoste EA, et al. Variation in critical care services across North America and Western Europe. <i>Crit Care Med</i> . 2008;36(10):2787-93, e1-9                                                                    |
| 2  | Prin 2012                                                                                      | United States                              | Prin M, Wunsch H. International comparisons of intensive care: informing outcomes and improving standards. <i>Curr Opin Crit Care</i> . 2012;18(6):700-6                                                                                                                 |
| 3  | Painter 2013                                                                                   | United States                              | Painter JR. Critical care in the surgical global period. <i>Chest</i> . 2013;143(3):851-5                                                                                                                                                                                |
| 4  | Royal College of Anaesthetists 2018                                                            | England                                    | <a href="https://www.rcoa.ac.uk/sites/default/files/documents/2020-06/EMC-Guidelines2018.pdf">https://www.rcoa.ac.uk/sites/default/files/documents/2020-06/EMC-Guidelines2018.pdf</a>                                                                                    |
| 5  | Joint Faculty of Intensive Care Medicine of Ireland and Intensive Care Society of Ireland 2019 | Ireland                                    | <a href="https://jficmi.anaesthesia.ie/wp-content/uploads/2019/09/National-Standards-for-Adult-Critical-Services-2019.pdf">https://jficmi.anaesthesia.ie/wp-content/uploads/2019/09/National-Standards-for-Adult-Critical-Services-2019.pdf</a>                          |
| 6  | Marshall 2017                                                                                  | Many countries                             | Marshall JC, Bosco L, Adhikari NK, Connolly B, Diaz J v., Dorman T, et al. What is an intensive care unit? A report of the task force of the World Federation of Societies of Intensive and Critical Care Medicine. <i>Journal of Critical Care</i> . 2017 Feb;37:270–6. |
| 7  | The International Surgical Outcomes Study 2016                                                 | Many countries                             | International Surgical Outcomes Study g. Global patient outcomes after elective surgery: prospective cohort study in 27 low-, middle- and high-income countries. <i>Br J Anaesth</i> . 2016;117(5):601-9                                                                 |
| 8  | Benneyworth 2015                                                                               | United States                              | Benneyworth BD, Bennett WE, Carroll AE. Cross-sectional comparison of critically ill pediatric patients across hospitals with various levels of pediatric care. <i>BMC Res Notes</i> . 2015;8:693.                                                                       |
| 9  | Kievlan 2016                                                                                   | United States                              | Kievlan DR, Martin-Gill C, Kahn JM, Callaway CW, Yealy DM, Angus DC, et al. External validation of a prehospital risk score for critical illness. <i>Crit Care</i> . 2016;20(1):255.                                                                                     |
| 10 | Boyle 2008                                                                                     | Australia                                  | Boyle M, Butcher R, Conyers V, Kendrick T, MacNamara M, Lang S. Transition to intensive care nursing: establishing a starting point. <i>Aust Crit Care</i> . 2008;21(4):190-8.                                                                                           |
| 11 | Hirshon 2013                                                                                   | United States                              | Hirshon JM, Risko N, Calvillo EJ, Stewart de Ramirez S, Narayan M, Theodosis C, et al. Health systems and services: the role of acute care. <i>Bull World Health Organ</i> . 2013;91(5):386-8                                                                            |
| 12 | McCarthy 2013                                                                                  | United States                              | McCarthy C, O'Rourke NC, Madison JM. Integrating advanced practice providers into medical critical care teams. <i>Chest</i> . 2013;143(3):847-50                                                                                                                         |
| 13 | Intensive Care Society 2009                                                                    | United Kingdom                             | <a href="https://icmwk.com/wp-content/uploads/2014/02/Revised-Levels-of-Care-21-12-09.pdf">https://icmwk.com/wp-content/uploads/2014/02/Revised-Levels-of-Care-21-12-09.pdf</a>                                                                                          |

## Towards Definitions of Critical Care and Critical Illness: A Concept Analysis

| Section Item              | PRISMA-ScR Checklist Item                                                                                                                                                                                                                                                 | Page |
|---------------------------|---------------------------------------------------------------------------------------------------------------------------------------------------------------------------------------------------------------------------------------------------------------------------|------|
| <b>Title</b>              | Identify the report as a scoping review.                                                                                                                                                                                                                                  | -    |
| <b>Abstract</b>           |                                                                                                                                                                                                                                                                           |      |
| Structured summary        | Provide a structured summary that includes (as applicable) background, objectives, eligibility criteria, sources of evidence, charting methods, results, and conclusions that relate to the review questions and objectives.                                              | 1    |
| <b>Introduction</b>       |                                                                                                                                                                                                                                                                           |      |
| Rationale                 | Describe the rationale for the review in the context of what is already known. Explain why the review questions/objectives lend themselves to a scoping review approach.                                                                                                  | 3-4  |
| Objectives                | Provide an explicit statement of the questions and objectives being addressed with reference to their key elements (e.g., population or participants, concepts, and context) or other relevant key elements used to conceptualize the review questions and/or objectives. | 4    |
| <b>Methods</b>            |                                                                                                                                                                                                                                                                           |      |
| Protocol and registration | Indicate whether a review protocol exists; state if and where it can be accessed (e.g., a Web address); and if available, provide registration information, including the registration number.                                                                            | 5    |
| Eligibility criteria      | Specify characteristics of the sources of evidence used as eligibility criteria (e.g.,                                                                                                                                                                                    | 5    |



|                                                      |                                                                                                                                                                                                                                                                                                            |          |
|------------------------------------------------------|------------------------------------------------------------------------------------------------------------------------------------------------------------------------------------------------------------------------------------------------------------------------------------------------------------|----------|
|                                                      | years considered, language, and publication status), and provide a rationale.                                                                                                                                                                                                                              |          |
| 6 Information sources                                | Describe all information sources in the search (e.g., databases with dates of coverage and contact with authors to identify additional sources), as well as the date the most recent search was executed                                                                                                   | 5        |
| Search                                               | Present the full electronic search strategy for at least 1 database, including any limits used, such that it could be repeated.                                                                                                                                                                            | 5        |
| Selection of sources of evidence                     | State the process for selecting sources of evidence (i.e., screening and eligibility) included in the scoping review.                                                                                                                                                                                      | 5        |
| Data charting process                                | Describe the methods of charting data from the included sources of evidence (e.g., calibrated forms or forms that have been tested by the team before their use, and whether data charting was done independently or in duplicate) and any processes for obtaining and confirming data from investigators. | 7        |
| Data items                                           | List and define all variables for which data were sought and any assumptions and simplifications made.                                                                                                                                                                                                     | 5        |
| Critical appraisal of individual sources of evidence | If done, provide a rationale for conducting a critical appraisal of included sources of evidence; describe the methods used and how this information was used in any data synthesis (if appropriate).                                                                                                      | Not Done |
| Summary measures                                     | Not applicable for scoping reviews                                                                                                                                                                                                                                                                         | N/A      |

|                                               |                                                                                                                                                                                                 |          |
|-----------------------------------------------|-------------------------------------------------------------------------------------------------------------------------------------------------------------------------------------------------|----------|
| Synthesis of results                          | Describe the methods of handling and summarizing the data that were charted.                                                                                                                    | 7        |
| Risk of bias across studies                   | Not applicable for scoping reviews                                                                                                                                                              | N/A      |
| Additional analyses                           | Not applicable for scoping reviews.                                                                                                                                                             | N/A      |
| <b>Results</b>                                |                                                                                                                                                                                                 |          |
| Selection of sources of evidence              | Give numbers of sources of evidence screened, assessed for eligibility, and included in the review, with reasons for exclusions at each stage, ideally using a flow diagram.                    | 5-7      |
| Characteristics of sources of evidence        | For each source of evidence, present characteristics for which data were charted and provide the citations.                                                                                     | 9-13     |
| Critical appraisal within sources of evidence | If done, present data on critical appraisal of included sources of evidence (see item 12).                                                                                                      | Not Done |
| Results of individual sources of evidence     | For each included source of evidence, present the relevant data that were charted that relate to the review questions and objectives.                                                           | 9-13     |
| Synthesis of results                          | Summarize and/or present the charting results as they relate to the review questions and objectives.                                                                                            | 9-13     |
| Risk of bias across studies                   | Not applicable for scoping reviews.                                                                                                                                                             | N/A      |
| Additional analyses                           | Not applicable for scoping reviews.                                                                                                                                                             | N/A      |
| <b>Discussion</b>                             |                                                                                                                                                                                                 |          |
| Summary of evidence                           | Summarize the main results (including an overview of concepts, themes, and types of evidence available), link to the review questions and objectives, and consider the relevance to key groups. | 14-17    |

|                                              |                |                                                                                                                                                                                 |    |
|----------------------------------------------|----------------|---------------------------------------------------------------------------------------------------------------------------------------------------------------------------------|----|
| 1<br>2<br>3<br>4<br>5<br>6                   | Limitations    | Discuss the limitations of the scoping review process.                                                                                                                          | 17 |
| 7<br>8<br>9<br>10<br>11<br>12                | Conclusions    | Provide a general interpretation of the results with respect to the review questions and objectives, as well as potential implications and/or next steps.                       | 17 |
| 13<br>14<br>15<br>16<br>17<br>18<br>19<br>20 | <b>Funding</b> | Describe sources of funding for the included sources of evidence, as well as sources of funding for the scoping review. Describe the role of the funders of the scoping review. | 18 |

# BMJ Open

## Towards definitions of critical illness and critical care using concept analysis

|                                 |                                                                                                                                                                                                                                                                                                                                                                                                                                                                                                                                                                                                                                                                                                                                                |
|---------------------------------|------------------------------------------------------------------------------------------------------------------------------------------------------------------------------------------------------------------------------------------------------------------------------------------------------------------------------------------------------------------------------------------------------------------------------------------------------------------------------------------------------------------------------------------------------------------------------------------------------------------------------------------------------------------------------------------------------------------------------------------------|
| Journal:                        | <i>BMJ Open</i>                                                                                                                                                                                                                                                                                                                                                                                                                                                                                                                                                                                                                                                                                                                                |
| Manuscript ID                   | bmjopen-2022-060972.R2                                                                                                                                                                                                                                                                                                                                                                                                                                                                                                                                                                                                                                                                                                                         |
| Article Type:                   | Original research                                                                                                                                                                                                                                                                                                                                                                                                                                                                                                                                                                                                                                                                                                                              |
| Date Submitted by the Author:   | 15-Jul-2022                                                                                                                                                                                                                                                                                                                                                                                                                                                                                                                                                                                                                                                                                                                                    |
| Complete List of Authors:       | Kayambankadzanja,, Raphael; University of Malawi College of Medicine, Public Health & Family Medicine; Queen Elizabeth Central Hospital, Anaesthesia and Intensive Care<br>Schell, Carl; Karolinska Institute, Global Public Health; Uppsala Universitet, Centre for Clinical Research Sörmland<br>Gerdin Wärnberg, Martin ; Karolinska Institutet, Department of Public Health Sciences<br>Tamras, Thomas; Södertälje Hospital<br>Mollazadegan, Hedi; Sankt Goran Hospital, The Department of Addiction Medicine<br>Holmberg, Mats; Region Sormland, Department of Ambulance Service<br>Alvesson, Helle; Karolinska Institutet, Department of Public Health Sciences<br>Baker, Tim; Karolinska Institutet, Department of Global Public Health |
| <b>Primary Subject Heading</b>: | Health services research                                                                                                                                                                                                                                                                                                                                                                                                                                                                                                                                                                                                                                                                                                                       |
| Secondary Subject Heading:      | Intensive care, Health services research, Nursing, Public health                                                                                                                                                                                                                                                                                                                                                                                                                                                                                                                                                                                                                                                                               |
| Keywords:                       | Adult intensive & critical care < ANAESTHETICS, ACCIDENT & EMERGENCY MEDICINE, HEALTH SERVICES ADMINISTRATION & MANAGEMENT                                                                                                                                                                                                                                                                                                                                                                                                                                                                                                                                                                                                                     |
|                                 |                                                                                                                                                                                                                                                                                                                                                                                                                                                                                                                                                                                                                                                                                                                                                |

SCHOLARONE™  
Manuscripts



I, the Submitting Author has the right to grant and does grant on behalf of all authors of the Work (as defined in the below author licence), an exclusive licence and/or a non-exclusive licence for contributions from authors who are: i) UK Crown employees; ii) where BMJ has agreed a CC-BY licence shall apply, and/or iii) in accordance with the terms applicable for US Federal Government officers or employees acting as part of their official duties; on a worldwide, perpetual, irrevocable, royalty-free basis to BMJ Publishing Group Ltd ("BMJ") its licensees and where the relevant Journal is co-owned by BMJ to the co-owners of the Journal, to publish the Work in this journal and any other BMJ products and to exploit all rights, as set out in our [licence](#).

The Submitting Author accepts and understands that any supply made under these terms is made by BMJ to the Submitting Author unless you are acting as an employee on behalf of your employer or a postgraduate student of an affiliated institution which is paying any applicable article publishing charge ("APC") for Open Access articles. Where the Submitting Author wishes to make the Work available on an Open Access basis (and intends to pay the relevant APC), the terms of reuse of such Open Access shall be governed by a Creative Commons licence – details of these licences and which [Creative Commons](#) licence will apply to this Work are set out in our licence referred to above.

Other than as permitted in any relevant BMJ Author's Self Archiving Policies, I confirm this Work has not been accepted for publication elsewhere, is not being considered for publication elsewhere and does not duplicate material already published. I confirm all authors consent to publication of this Work and authorise the granting of this licence.

# 1 Towards definitions of critical illness and critical care using concept analysis

2 Raphael Kazidule Kayambankadzanja<sup>1,2</sup>, Carl Otto Schell<sup>3,4,5</sup>, Martin Gerdin Wärnberg<sup>3,6</sup>, Thomas  
3 Tamras<sup>7</sup>, Hedi Mollazadegan<sup>8</sup>, Mats Holmberg<sup>9,10,11</sup>, Helle Mølsted Alvesson<sup>3</sup>, Tim Baker<sup>3,12,13</sup>

4 1. Department of Anaesthesia and Intensive Care, Queen Elizabeth Central Hospital, Blantyre Malawi

5 2. Department of Public Health, Kamuzu University of Health Sciences

6 3. Department of Global Public Health, Karolinska Institutet, Stockholm, Sweden

7 4. Centre for Clinical Research Sörmland, Uppsala University, Eskilstuna, Sweden

8 5. Department of Medicine, Nyköping Hospital, Nyköping, Sweden.

9 6. Function Perioperative Medicine and Intensive Care, Karolinska University Hospital, Solna, Sweden

10 7. Södertälje Hospital, Stockholm, Sweden

11 8. The Department of Addiction Medicine, Sankt Goran Hospital, Stockholm, Sweden

12 9. Faculty of Health and Life Sciences, Linnaeus University, Växjö, Sweden

13 10. School of Health, Care and Social Welfare, Mälardalen University, Eskilstuna, Sweden

14 11. Centre for Clinical Research Sörmland, Uppsala University, Eskilstuna, Sweden

15 12. Department of Clinical Research, London School of Hygiene & Tropical Medicine, London, UK

16 13. Department of Emergency Medicine, Muhimbili University of Health and Allied Sciences, Dar es Salaam, Tanzania

17  
18 Corresponding Author: Tim Baker Email: tim.baker@ki.se

## 19 Abstract

### 20 Objective

21 As “critical illness” and “critical care” lack consensus definitions, this study aimed to explore how  
22 the concepts’ are used, describe their defining attributes, and propose potential definitions.

### 23 Design and Methods

24 We used the Walker and Avant approach to concept analysis. The uses and definitions of the  
25 concepts were identified through a scoping review of the literature and an online survey of 114  
26 global clinical experts. We used the Arksey and O’Malley framework for scoping reviews and  
27 searched in PubMed and Web of Science with a strategy including terms around critical  
28 illness/care and definitions/etymologies limited to publications in English between 1<sup>st</sup> January  
29 2008 and 1<sup>st</sup> January 2020. The experts were selected through purposive sampling and  
30 snowballing, with 36.8% in Africa, 25.4% in Europe, 22.8% in North America, 10.5% in Asia,  
31 2.6% in South America and 1.8% in Australia. They worked with Anaesthesia or Intensive Care  
32 (59.1%), Emergency Care 15.8%, Medicine 9.5%, Paediatrics 5.5%, Surgery 4.7%, Obstetrics and

1  
2  
3 33 Gynaecology 1.6% and other specialties 3.9%. Through content analysis of the data we extracted  
4 34 codes, categories, and themes to determine the concepts' defining attributes and we proposed  
5 35 potential definitions. To assist understanding, we developed model, related and contrary cases  
6 36 concerning the concepts, we identified antecedents and consequences to the concepts, and defined  
7 37 empirical referents.

## 11 38 **Results**

13 39 Nine and 13 articles were included in the scoping reviews of critical illness and critical care  
14 40 respectively. A total of 48 codes, 14 categories and 4 themes were identified in the uses and  
15 41 definitions of critical illness and 60 codes, 13 categories and 5 themes for critical care. The defining  
16 42 attributes of critical illness were a high risk of imminent death; vital organ dysfunction;  
17 43 requirement for care to avoid death; and potential reversibility. The defining attributes of critical  
18 44 care were the identification, monitoring and treatment of critical illness; vital organ support; initial  
19 45 and sustained care; any care of critical illness; and specialized human and physical resources. The  
20 46 defining attributes led to our proposed definitions of critical illness as, "*a state of ill health with*  
21 47 *vital organ dysfunction, a high risk of imminent death if care is not provided and the potential for*  
22 48 *reversibility*", and of critical care as, "*the identification, monitoring and treatment of patients with*  
23 49 *critical illness through the initial and sustained support of vital organ functions.*"

## 32 50 **Conclusion**

34 51 The concepts critical illness and critical care lack consensus definitions and have varied uses.  
35 52 Through concept analysis of uses and definitions in the literature and among experts we have  
36 53 identified the defining attributes of the concepts and proposed definitions that could aid clinical  
37 54 practice, research, and policy making.

41 55

## 44 56 **Strengths and limitations of this study**

- 46 57
- 47 58 • This concept analysis is the first study to systematically describe the uses and definitions  
48 59 of the concepts *critical illness* and *critical care*.
  - 50 60 • The study uses a scoping review of the literature and input from over one hundred clinical  
51 61 experts from diverse settings globally to identify the defining attributes and provide  
52 62 proposed definitions of the concepts.
- 53 63  
54 64  
55 65  
56 66  
57 67  
58 68  
59 69  
60 70

- 1  
2  
3 62 • Some uses and definitions of the concepts in languages other than English, in unpublished  
4 63 grey literature and from clinical experts not included in the study may have been missed.  
5  
6  
7 64 • As current usage of the concepts is diverse, the proposed definitions may not be universally  
8 65 accepted and are aimed to stimulate further discussion.  
9  
10  
11 66

## 13 67 **Introduction**

16 68 The concepts *critical illness* and *critical care* are commonly used in healthcare. In PubMed, both  
17 69 concepts are Medical Subject Headings (MeSH) terms, and searches for “critical illness” or  
18 70 “critical care” return 40,000 and 220,000 articles respectively. While it may seem evident that the  
19 71 concepts concern patients with very serious illness and their care, there is a lack of consensus  
20 72 around their precise definitions.

23 73 Critical illness is a concept concerning a patient’s condition that is distinct from the disease  
24 74 diagnosis. It has been argued that clinical practice is overly guided by diagnoses rather than  
25 75 prognoses.(1) We postulate that the lack of consensus around prognostic concepts such as critical  
26 76 illness may be one factor in this and could cause problems for clinical practice, research, and policy  
27 77 making. For the clinician, discordant interpretations of when a patient is critically ill could lead to  
28 78 differing clinical assessments and treatments despite similar states: for example, Doctor A  
29 79 interprets Patient B’s low blood oxygen level as critical illness, triggers an alarm and admits the  
30 80 patient to an intensive care unit, only for Doctor C to reverse the decision and discharge the patient  
31 81 as she interprets the illness as non-critical. For the researcher, it could be difficult to design a study  
32 82 or interpret findings: for example studies into the effect of dexamethasone for critical COVID-19,  
33 83 or of another treatment for all patients with critical illness, require clear eligibility criteria and  
34 84 translating the findings to another patient group requires that the groups have similar clinical  
35 85 conditions. For the policy maker, prioritising programmes and investments designed to improve  
36 86 care for very sick patients relies on comparisons between similar groups and clearly defined  
37 87 interventions.

38 88 Even quantifying the total global burden of critical illness has been challenging due to the lack of  
39 89 an agreed definition.(2) Proxies have been used instead, for example summing up syndromes  
40 90 considered to comprise critical illness such as sepsis and acute lung injury – resulting in estimates



1  
2  
3 91 of up to 45 million critical illness cases each year.(2) Low- and middle-income countries are  
4 92 suspected to have the highest burden (3), but the lack of a definition has hampered comparisons  
5  
6 93 across settings(4).  
7

8  
9 94 Studying the care for critically ill patients has also been problematic. Studies have focused on care  
10 95 provided in hospital locations such as in intensive care or emergency units, which exclude care  
11 96 provided in hospitals lacking such units, and to critically ill patients in general hospital wards.(5–  
12 97 7) In the COVID-19 pandemic, there have been great efforts to describe, scale-up and improve  
13 98 care for critically ill patients throughout the world,(5,7) and a lack of agreement around the concept  
14 99 of critical care has hampered these efforts.(8,9)  
15  
16  
17  
18

19  
20 100 These examples illustrate how important concepts are as the building blocks of theories and  
21 101 communication. Ideally, concepts are clearly-defined and their uses well-described for  
22 102 unambiguous communication and an understanding about exactly what is being described or  
23 103 explained.(10) *Concept analysis* is a method for investigating how concepts are used and  
24 104 understood. Concept analyses have been conducted in diverse fields such as in teamwork(11),  
25 105 postoperative recovery(12) and bioterrorism preparedness(13), all with the aim of providing  
26 106 basic conceptual understanding and facilitating communication. In this paper, we have used  
27 107 concept analysis, following the stepwise approach described by Walker and Avant(10). The first  
28 108 two steps in the approach are to choose the concept and determine the aim of the analysis. Our  
29 109 chosen concepts are *critical illness* and *critical care* and our aims are to explore the uses and  
30 110 definitions of the concepts in published sources and by global clinical experts, leading to a  
31 111 description of the defining attributes of the concepts and to proposed definitions.  
32  
33  
34  
35  
36  
37  
38  
39  
40

## 41 112 **Methods**

42  
43  
44 113 Concepts are the basic building blocks in theory construction, research, and communication. A  
45 114 concept analysis aims to define the concept's attributes and facilitate decisions about which  
46 115 phenomena match the concept, and which do not. In this study, Walker and Avant's method for  
47 116 concept analysis was chosen as a systematic approach used previously in similar studies.(10)The  
48 117 approach consists of eight steps: 1) Select the concept; 2) Determine the aim of analysis; 3) Identify  
49 118 all uses of the concept that you can discover; 4) Determine the defining attributes; 5) Identify a  
50 119 model case; 6) Identify borderline, related, contrary, invented, and illegitimate cases; 7) Identify  
51  
52  
53  
54  
55  
56  
57  
58  
59  
60

1  
2  
3 120 antecedents and consequences; 8) Define empirical referents. In this paper steps 1 and 2 are  
4 121 described in the introduction section, step 3 in the method section and steps 4-8 in the results  
5 122 section. Thus, the continuation of this article addresses steps 3-8 in Walker and Avant's method.  
6  
7 123 (10)  
8  
9

### 10 124 **Step 3: Identifying the uses of the concepts**

11 125 We identified the uses of the concepts of critical illness and critical care through a scoping review  
12 126 of the literature and a web-based survey of global experts.

#### 13 127 *Scoping Review*

14 128 We used the Arksey and O'Malley framework for scoping reviews(14). Relevant studies published  
15 129 in English between 1<sup>st</sup> January 2008 and 1<sup>st</sup> January 2020 were identified in the PubMed and Web  
16 130 of Science databases. We began the search in 2018 and deemed that articles published prior to  
17 131 2008 were more than 10 years old and would have less relevance. To include publications that  
18 132 were not found through the database searches, we hand-searched publication lists and grey  
19 133 literature of intensive care medicine and emergency medicine societies. Duplicates were removed  
20 134 using the software Rayyan(15). The publications were examined through title, then abstract review  
21 135 and lastly by full-text review. The scoping review protocols were published in advance on the  
22 136 www.protocols.io database.  
23  
24  
25  
26  
27  
28  
29  
30  
31  
32  
33

#### 34 137 *Critical Illness*

35 138 The search strategy used the terms terminolog\*, etymolog\*, nomenclatur\*, OR definition\*, AND  
36 139 emergency, critical\*, acute\*, OR sever\*, AND ill OR illness. A total of 9323 articles were  
37 140 identified using these critical illness terms in the databases and an additional two articles were  
38 141 identified through hand-searching. Of these, 1126 articles were identified as duplicates and the  
39 142 remaining 8199 articles were screened by title and abstract review by two of the authors (TT and  
40 143 HM). 8168 articles were excluded as they did not concern critical illness, were not written in  
41 144 English or were not available in full text online, leaving 31 articles for inclusion for full-text  
42 145 review. In the full-text review, 22 articles were excluded as they did not define critical illness,  
43 146 and so nine articles were included in the analysis (Figure 1 and Supplementary Table 1).  
44  
45  
46  
47  
48  
49  
50

51 147 Figure 1. Study Flow Chart  
52  
53  
54  
55  
56  
57  
58  
59  
60

### 149 **Critical Care**

150 The search strategy used the terms terminolog\*, etymolog\*, nomenclatur\*, OR definition\*, AND  
 151 critical care, intensive care, emergency care, OR acute care. A total of 7286 articles were identified  
 152 using these critical care terms in the databases and an additional six articles were identified through  
 153 hand-searching. Of these, 1964 were identified as duplicates and the remaining 5322 articles were  
 154 screened by title and abstract review by two of the authors (TT and HM). 5269 articles were  
 155 excluded as they were not concerning critical care, not written in English or not available in full  
 156 text online, leaving 59 articles for inclusion for full-text review. In the full-text review, 46 articles  
 157 were excluded as they did not define critical care and so 13 articles were included in the analysis  
 158 (Figure 1 and Supplementary Table 2).

### 159 **Expert survey**

160 The survey used open-ended questions to gather information about the experts' definitions of  
 161 critical illness and critical care, and how they see the relationship of the concepts to connected  
 162 concepts in order to provide context. The survey included the questions: i. *How would you define*  
 163 *critical illness?*, ii. *How would you define critical care?*, iii. *Do critical care and intensive care*  
 164 *differ? If yes, in what way?* iv. *Do critical care and emergency care differ and if yes, in what way?*  
 165 v. *Do critical care and acute care differ and if yes, in what way?*

166 The inclusion criterion for an expert to be invited to participate in the survey was experience in  
 167 any medical specialty that includes care of patients with acute, severe illness. Experts were  
 168 identified from a stakeholder mapping of global critical care done by one of the authors (TB,  
 169 unpublished), and those known to the researchers to be global experts in the field of critical care.  
 170 Purposive sampling was used to invite experts with the aim of including 100 experts with a balance  
 171 between specialties, geographical locations, health worker cadres and gender. In total 146 experts  
 172 were invited to take part, and 114 completed the survey (78% response rate) (Figure 1 and Table  
 173 1).

174 **Table 1: Characteristics of the experts who participated in the survey**

| Variable | Frequency (%) |
|----------|---------------|
| All      | 114           |
| Gender   |               |
| Male     | 80 (70.2)     |
| Female   | 34 (29.8)     |

|                            |           |
|----------------------------|-----------|
| Continent                  |           |
| Africa                     | 42 (36.8) |
| Europe                     | 29 (25.4) |
| North America              | 26 (22.8) |
| Asia                       | 12 (10.5) |
| South America              | 3 (2.6)   |
| Australia                  | 2 (1.8)   |
| Cadres*                    |           |
| Physician                  | 93 (53.1) |
| Researcher                 | 62 (35.4) |
| Nurse                      | 12 (6.9)  |
| Policy Maker               | 5 (2.9)   |
| Other                      | 3 (1.7)   |
| Specialty*                 |           |
| Anaesthesia/Intensive Care | 75 (59.1) |
| Emergency Care             | 20 (15.8) |
| Medicine                   | 12 (9.5)  |
| Paediatrics                | 7 (5.5)   |
| Surgery                    | 6 (4.7)   |
| Obstetrics and Gynaecology | 2 (1.6)   |
| Other                      | 5 (3.9)   |

175 \* As the experts were asked to select all that apply, the sum may exceed 100%

176

#### 177 **Step 4: Analysis and determining the defining attributes**

178 All the definitions and usages of critical illness and critical care from the scoping reviews and the  
 179 expert survey were charted and analysed using a content analysis based on methods developed by  
 180 Erlingsson & Brysiewicz.(16) First, the data from any parts of the literature and from the expert  
 181 survey that concerned the uses or definitions of the concepts were extracted. The data were coded,  
 182 and the codes analysed iteratively by the study team. Repeated and redundant codes were removed  
 183 and similar codes were arranged into categories. The data were revisited when new categories  
 184 arose or when diverse opinions with contrasting attributes were identified. Through the process,  
 185 themes emerged that captured the defining attributes of the concepts. Using the defining attributes,  
 186 definitions of the concepts were constructed by the research team to be coherent and useful.

187

#### 188 **Steps 5-8: presenting a model case, related and contrary cases, identifying antecedents and** 189 **consequences, and defining empirical referents**

190 The model cases, related, and contrary cases were developed by the researchers to provide  
 191 examples to illustrate the defining attributes of the concepts that emerged from the concept  
 192 analysis. Model cases were developed to be clinically realistic and to include all the defining

1  
2  
3 193 attributes. Related cases were developed that include some, but not all, of the defining attributes,  
4 194 and contrary cases that are clearly “not the concept”, containing none of the defining attributes.  
5  
6 195 For simplicity in this study, we limited our cases to examples of patients with respiratory disease.  
7  
8 196 Antecedents and consequences were identified as events that occur prior to the occurrence of each  
9 197 concept and as the outcomes of each concept respectively. Empirical referents were identified as  
10 198 phenomena that demonstrate the occurrence of each concept “in real life”.

11  
12  
13  
14 199 **Ethical considerations:** Informed consent was provided by all of the experts. The Research Ethics  
15 200 Committee of the London School of Hygiene and Tropical Medicine approved the study  
16 201 (Reference number 22661).

17  
18  
19  
20 202 **Patient and Public Involvement:** None

## 21 203 **Results**

22  
23  
24 204 The results relate to steps 4-8 in the Walker and Avant approach, as steps 1-3 have been described  
25 205 in the introduction and methods.

### 26 206 27 207 **Critical Illness**

#### 28 208 **Step 4: The defining attributes**

29  
30  
31 209 A total of 48 codes were identified from the uses and definitions of critical illness from the scoping  
32 210 review and expert survey. The codes were analysed into 14 categories and 4 themes. (Table 2).  
33 211 The themes represent the defining attributes of critical illness: *high risk of imminent death*; *vital*  
34 212 *organ dysfunction*; *requirement for care to avoid death*; and *potential reversibility*. (Figure 2)

35  
36  
37  
38  
39  
40  
41  
42  
43 213 **Table 2. Content analysis for the concept *critical illness***

| Code                                                   | Category                     | Theme                              |
|--------------------------------------------------------|------------------------------|------------------------------------|
| Severe illness                                         | Severe illness               | <b>High risk of imminent death</b> |
| Process of increasing severity                         |                              |                                    |
| Imminent risk of death                                 | High risk of imminent death  |                                    |
| Enough severity to lead to death rapidly               |                              |                                    |
| Can kill within a short time                           |                              |                                    |
| Medical condition that results in short term mortality | Acute onset or deterioration |                                    |
| Sudden onset illness or acute deterioration            |                              |                                    |
| Acute life-threatening illness                         |                              |                                    |
| An episode of acute illness                            |                              |                                    |
| Increased risk of death                                |                              |                                    |

|                                                                                   |                                     |                                            |
|-----------------------------------------------------------------------------------|-------------------------------------|--------------------------------------------|
| Continuous threat to life and well-being                                          | Life-threatening                    |                                            |
| Life-threatening or potentially life-threatening disease                          |                                     |                                            |
| High probability of life-threatening deterioration                                |                                     |                                            |
| Acutely life-threatening injury or illness                                        |                                     |                                            |
| At least one and often multiple organ dysfunction                                 | Organ dysfunction or failure        | <b>Vital organ dysfunction</b>             |
| Failure in one or more organ systems that needs support                           |                                     |                                            |
| Hemodynamic instability, respiratory failure, seizure, disorders of consciousness |                                     |                                            |
| Diseases with vital organ failures as complications                               |                                     |                                            |
| Threatened organ failure                                                          | Threatened organ dysfunction        |                                            |
| Potential disturbances of vital organ functions                                   |                                     |                                            |
| Threatened end-organ damage                                                       |                                     |                                            |
| Deranged vital parameters                                                         | Vital signs derangements            |                                            |
| Physiologic reserve is diminished, as manifested by abnormal vital signs          |                                     |                                            |
| NEWS2 $\geq$ 7                                                                    |                                     |                                            |
| Associated with significant morbidities if untreated                              | Treatment needed to avoid death     |                                            |
| Decline in a patient's ability to survive on their own                            |                                     |                                            |
| Conditions requiring rapid intervention to avert death or disability              |                                     |                                            |
| An illness which without rapid treatment would result in death or disability.     |                                     |                                            |
| Needs prompt and sustained intervention to avert death or lifelong disability     |                                     |                                            |
| If no intervention is made, death is certain                                      | Requirement for immediate treatment | <b>Requirement for care to avoid death</b> |
| Requiring minute-by-minute nursing and/or medical care                            |                                     |                                            |
| Requires a rapid diagnosis and response to ensure good outcomes                   |                                     |                                            |
| Illnesses where timely care can reduce the chances of death and disability        |                                     |                                            |
| Requires immediate intervention                                                   |                                     |                                            |
| The illness needs close monitoring and prompt management                          | Requirement for organ support       |                                            |
| Treatment delays of hours or less make interventions less effective               |                                     |                                            |
| Requiring organ support                                                           |                                     |                                            |
| Requiring vital organ support                                                     | Requires critical care              |                                            |
| Requiring intensified patient monitoring and organ support                        |                                     |                                            |
| Critical care services                                                            |                                     |                                            |
| ICU admission                                                                     | Need for specific care              |                                            |
| Illness that results in need for more than standard of care                       |                                     |                                            |
| Acute disease that needs specific treatment alongside the disease itself          |                                     |                                            |
| Some element of treatability                                                      | Reversible with treatment           |                                            |
| Any treatable life-threatening reversible illness                                 |                                     |                                            |
| Reversible life-threatening organ failure                                         | Potentially reversible              | <b>Potential reversibility</b>             |
| Life-threatening situation, illness or disease that is potentially reversible     |                                     |                                            |
| Acute potentially reversible illness                                              |                                     |                                            |

214

## 215 **Figure 2. The defining attributes of critical Illness**

### 216 **Proposed operational definition**

217 The proposed definition for critical illness is “*Critical illness is a state of ill health with vital organ*  
 218 *dysfunction, a high risk of imminent death if care is not provided and the potential for*  
 219 *reversibility.*”

### 220 **Cases**

#### 221 **Step 5: A model case of critical illness (a case including all the defining attributes)**

1  
2  
3 222 A woman has a viral pneumonia. She is breathless and hypoxic with a low oxygen level in her  
4 223 blood (oxygen saturation) of 74%. Her lungs are dysfunctional, and she has a life-threatening  
5 224 condition that is likely to lead to her death in the next few hours. She requires care to support her  
6 225 lungs (oxygen therapy) and if she receives that care, she has a chance of recovery.

10  
11 226 **Step 6: A related case for critical illness (a case including some of the defining attributes but**  
12 227 **not the attribute of “imminently life-threatening”)**

14 228 A man has a chest infection. He has a fever, is coughing up green sputum and feels short-of-breath  
15 229 when walking. He has an oxygen saturation of 91%. He has a serious condition, but it is not  
16 230 imminently life-threatening. He requires treatment, likely with antibiotics, but it is uncertain  
17 231 whether he requires any organ support such as oxygen. His condition is potentially reversible, and  
18 232 he can recover.

23 233 **A contrary case for critical illness (a clear example of “not the concept”)**

25 234 A woman has lung cancer. She is coughing up small amounts of blood but is able to walk to the  
26 235 hospital. She has an oxygen saturation of 94%. She is sick and she requires treatment. However,  
27 236 her illness is not imminently life-threatening, she has no dysfunctional vital organ and she does  
28 237 not require immediate care. Her condition may or may not be reversible.

32 238 **Step 7: Antecedents and consequences of Critical Illness**

35 239 The antecedents of critical illness are the onset of illness, in mild or moderate form, with  
36 240 progressing severity. The consequences of critical illness are either recovery or death.

39 241 **Step 8: Empirical Referents**

41 242 There are an estimated 30-45 million cases of critical illness globally each year(2). Many patients  
42 243 are cared for in hospitals with illnesses that are causing vital organ dysfunction and that are  
43 244 imminently life-threatening. There is much work done to identify patients with critical illness such  
44 245 as the use of single severely deranged vital signs(17), or compound scoring systems such as the  
45 246 National Early Warning Score (NEWS) and The Sequential Organ Failure Assessment score  
46 247 (SOFA) (18,19) . In hospitals, the severity of patients’ conditions can be assessed using tools such  
47 248 as the Acute Physiology and Chronic Health Evaluation (APACHE)(20) and the Simplified Acute  
48 249 Physiology Score (SAPS)(21).

250

251 ***Critical Care***252 **Step 4: The defining attributes**

253 A total of 60 codes were identified from the definitions of critical care from the scoping review  
 254 and expert survey. The codes were analysed into 13 categories and 5 themes. (Table 3) The themes  
 255 represent the concept's defining attributes: *identification, monitoring, and treatment of critical*  
 256 *illness; vital organ support; initial and sustained care; any care of critical illness; and specialized*  
 257 *human and physical resources.* (Figure 3)

258 **Table 3: Content analysis for the concept *critical care***

| Codes                                                                                                                     | Category                                          | Theme                                                                        |
|---------------------------------------------------------------------------------------------------------------------------|---------------------------------------------------|------------------------------------------------------------------------------|
| Identifying and addressing critical illness                                                                               | Identification and monitoring of critical illness | <b>Identification, monitoring, and treatment of critical illness</b>         |
| Medical care with timely monitoring                                                                                       |                                                   |                                                                              |
| Appropriate monitoring of critical illness                                                                                |                                                   |                                                                              |
| Management of critically ill patients                                                                                     | Treatment of critical illness                     |                                                                              |
| Treat critical illness                                                                                                    |                                                   |                                                                              |
| Care given to the critically ill                                                                                          |                                                   |                                                                              |
| Services required to stabilize critical illness                                                                           |                                                   |                                                                              |
| Reduce the risk of death from a critical illness                                                                          |                                                   |                                                                              |
| Care dedicated to patients with severe illness or potentially severe condition                                            | Addressing life-threatening condition             |                                                                              |
| Managing life-threatening condition                                                                                       |                                                   |                                                                              |
| Preventing the occurrence of life-threatening conditions                                                                  |                                                   |                                                                              |
| Treatment and management due to the threat of imminent deterioration                                                      | Supporting vital functions                        |                                                                              |
| Medical care required to reduce the risk to the patient's life                                                            |                                                   |                                                                              |
| Care to sustain cardiopulmonary functions                                                                                 |                                                   |                                                                              |
| Support the patient's hemodynamic or cardiorespiratory status                                                             |                                                   |                                                                              |
| Supportive care in critical illness to enable body's systems to continue functioning before definitive treatment can work |                                                   |                                                                              |
| Care of vital organ failure                                                                                               | Organ support                                     |                                                                              |
| Focus of care on supporting vital organs until improvement                                                                |                                                   |                                                                              |
| Providing organ support                                                                                                   |                                                   |                                                                              |
| Main focus on organ-supporting treatment.                                                                                 |                                                   |                                                                              |
| Support of vital organ function, or reverse specific organ dysfunctions                                                   |                                                   |                                                                              |
| Supportive care for organs that are failing                                                                               | Timely care                                       |                                                                              |
| Provision of support to dysfunctional body systems                                                                        |                                                   |                                                                              |
| Early management for saving and maintaining life                                                                          |                                                   |                                                                              |
| Rapid and timely intervention that is administered in critical illness                                                    |                                                   |                                                                              |
| From admission until the course of illness ends, either in full recovery or death                                         |                                                   | From start of critical illness until the patient is no longer critically ill |
| From home through to discharge from hospital                                                                              |                                                   |                                                                              |
| From the time of first contact with healthcare services through to stabilization                                          |                                                   |                                                                              |
| To the point where the illness or injury is no longer acutely life-threatening                                            | Sustained care                                    |                                                                              |
| Critical care could be over days to weeks                                                                                 |                                                   |                                                                              |
| Constant monitoring                                                                                                       | Any location                                      | <b>Any care of critical illness</b>                                          |
| Irrespective of the location of the patient within the health system                                                      |                                                   |                                                                              |
| Anywhere in the emergency or inpatient setting                                                                            |                                                   |                                                                              |
| Any care provided to critically ill patients                                                                              |                                                   |                                                                              |



|                                                                                                        |                                         |                                                 |
|--------------------------------------------------------------------------------------------------------|-----------------------------------------|-------------------------------------------------|
| Can be specialized care but depends on the level of resources                                          | Any care provided to                    | <b>Specialized human and physical resources</b> |
| Usually located in an area with infrastructure to support these activities                             | Specific area                           |                                                 |
| Inside a healthcare facility, outside the emergency department                                         |                                         |                                                 |
| High dependency care                                                                                   |                                         |                                                 |
| Care in ICU or Critical care unit                                                                      |                                         |                                                 |
| A place where equipment, staff and environment is ready to save patients with life-threatening disease |                                         |                                                 |
| Multidisciplinary care                                                                                 | Multi-disciplinary and specialist staff |                                                 |
| Specially trained staff                                                                                |                                         |                                                 |
| Essentially a team-based and multi-professional care                                                   |                                         |                                                 |
| Requires the grouping of special facilities and specially trained staff                                | High-intensity care                     |                                                 |
| Higher level of care than is available on a general ward                                               |                                         |                                                 |
| Minute-by-minute nursing and/or medical care                                                           |                                         |                                                 |
| Advanced respiratory support / mechanical ventilation                                                  |                                         |                                                 |
| Nursing 24/7                                                                                           |                                         |                                                 |
| High nurse: patient ratio no lower than 1:2                                                            |                                         |                                                 |

259

### 260 **Figure 3. Defining attributes of critical care**

#### 261 **Proposed operational definition of *Critical care***

262 The proposed definition for critical care is “*Critical care is the identification, monitoring, and*  
 263 *treatment of patients with critical illness through the initial and sustained support of vital organ*  
 264 *functions.*”

#### 265 ***Cases***

##### 266 **Step 5: A model case of critical care (a case including all the defining attributes)**

267 A woman with a viral pneumonia is rapidly identified as critically ill when she arrives at the  
 268 hospital. She is immediately admitted to a unit with supplies for managing critically ill patients  
 269 and treatment is started. Nurses and doctors who have been trained in the care of critical illness  
 270 monitor her regularly, and provide continuous care, titrating the treatments as needed. Continuous  
 271 oxygen therapy is provided for her life-threatening hypoxia, supporting her respiratory  
 272 dysfunction, until she has recovered and is no longer critically ill.

##### 273 **Step 6: A related case of critical care (a case including some of the defining attributes but** 274 **not the attribute of “vital organ support”)**

275 Care in a hospital is provided to a man with a chest infection. A nurse assesses him at arrival to  
 276 hospital. A doctor admits him to the ward, prescribes antibiotics and decides he is not critically ill  
 277 and does not require support for any of his vital organs. After four days the doctor discharges him  
 278 from hospital.

1  
2  
3 279 **A contrary case of critical care (a clear example of “not the concept”)**  
4

5 280 In the outpatient department, care is provided to a woman with lung cancer. A doctor and a nurse  
6  
7 281 do some investigations and prescribe some medications. She is sent home with a follow-up  
8  
9 282 appointment two weeks later.

10  
11 283 **Step 7: Antecedents and consequences of critical care**  
12

13 284 The antecedents of critical care are the contact of the patient with the healthcare system and may  
14  
15 285 include other care of a patient who has not deteriorated to the point of becoming critically ill. The  
16  
17 286 consequences of critical care are either the patient’s recovery or death.

18  
19 287 **Step 8: Empirical Referents**  
20

21 288 Many hospitals have wards or units for the provision of critical care, such as Emergency Units,  
22  
23 289 High Dependency Units or Intensive Care Units (ICUs) (22). Critical care can also be provided in  
24  
25 290 general wards, and a recent global consensus specified the care that should be included for all  
26  
27 291 patients with critical illness in any hospital location(23). Rapid Response Teams or Medical  
28  
29 292 Emergency Teams have been introduced into some hospitals, often consisting of staff from the  
30  
31 293 ICU responding to calls from the wards when a critically ill patient has been identified, and  
32  
33 294 providing either critical care on the ward, or transferring the patient to the ICU (24).  
34

35 295

36 296 **Discussion**  
37

38  
39 297 We have described how the concepts *critical illness* and *critical care* are used and defined in the  
40  
41 298 literature and by a selection of global experts using a concept analysis approach.

42  
43 299 Our proposed definition for critical illness of, “*a state of ill health with vital organ dysfunction, a*  
44  
45 300 *high risk of imminent death if care is not provided and the potential for reversibility*”, is similar to  
46  
47 301 those in some key publications. Chandrashekar et al state that, “*Critical illness is any condition*  
48  
49 302 *requiring support of failing vital organ systems without which survival would not be possible*”  
50  
51 303 (25) . Painter et al write that, “*A critically ill or injured patient is defined as one who has an*  
52  
53 304 *illness or injury impairing one or more vital organ systems such that there is a high probability of*  
54  
55 305 *imminent or life-threatening deterioration in the patient's condition*”(26) . Indeed, we found  
56  
57  
58  
59

1  
2  
3 306 widespread agreement in the literature and expert sources that critical illness concerns the  
4 307 attributes “life-threatening illness” and “organ dysfunction”.

6  
7 308 However, we found diverse and varied usage of the concept concerning the attribute of reversibility  
8 309 and the interface between critical illness and the natural process of dying. Some uses included only  
9 310 illness that was potentially reversible – these sources regarded that for critical illness there should  
10 311 be a possible chance of recovery. Without this, critical illness would be a concept that encompasses  
11 312 the dying process – everyone would be critically ill immediately before death – which would  
12 313 conflict with many clinical uses and understandings of the term. Others had a wider interpretation  
13 314 including all life-threatening illness and did not include reversibility in the definition as it is  
14 315 difficult to identify in the clinical setting, and the concept risks becoming context dependent, (high-  
15 316 resource interventions may reverse some critical illness which would not be possible in low-  
16 317 resource healthcare). Our iterative content analysis method led to our interpretation that  
17 318 reversibility should be included as one of the defining attributes and to make a distinction between  
18 319 critical illness and illness at the end of life.(27) This conclusion should be seen as one possible  
19 320 interpretation that can stimulate further discussion.

20  
21 321 It is hoped that the proposed definition of critical illness assists communication in the field.  
22 322 Previously, studies about critical illness have focused on patients in certain hospital units, or with  
23 323 diseases or syndromes as proxies for critical illness that exclude some critically ill patients.(2,28)  
24 324 Our definition of critical illness is not diagnosis or syndrome specific and can be due to any  
25 325 underlying condition. The definition could facilitate the specification of clinical criteria for the  
26 326 identification of critical illness, estimates of the overall burden of critical illness, assessments of  
27 327 outcomes for patients with critical illness across centres and settings, and interventions to improve  
28 328 outcomes.

29  
30  
31 329 For critical care, there was greater diversity around its use and definition. There was widespread  
32 330 agreement that critical care included the attributes of, “care of critically ill patients”, and the  
33 331 “support of vital organs”. However, there were differing uses around the location of the care and  
34 332 the need for specialized resources. Some sources considered critical care to be only the care  
35 333 provided in certain locations, (such as ICUs or critical care units), or to be care that is always  
36 334 highly specialized or resource intensive. The World Federation of Societies of Intensive and  
37 335 Critical Care Medicine have suggested that critical care is synonymous with intensive care and is,

1  
2  
3 336 “a multidisciplinary and interprofessional specialty dedicated to the comprehensive management  
4 337 of patients having, or at risk of developing, acute, life-threatening organ dysfunction. [Critical  
5 338 care] uses an array of technologies that provide support of failing organ systems, particularly the  
6  
7 339 lungs, cardiovascular system, and kidneys.”(22) In contrast, other sources used critical care to  
8  
9 340 be inclusive of any care for patients with critical illness, irrespective of location or resources. The  
10  
11 341 Joint Faculty of Intensive Care Medicine of Ireland state that critical care units are those that,  
12  
13 342 “provide life sustaining treatment for critically ill patients with acute organ dysfunction due to  
14  
15 343 potentially reversible disease”,(29) and in Belgium, critical care beds have been defined as any  
16  
17 344 beds “for patients with one or more organ functions compromised”(4) Hirshon et al strike a  
18  
19 345 balance between these two contrasting views, “[Critical care is] the specialized care of patients  
20  
21 346 whose conditions are life-threatening and who require comprehensive care and constant  
22  
23 347 monitoring, usually in intensive care units.” (30)

24  
25 348 Our proposed definition of, “the identification, monitoring, and treatment of patients with critical  
26  
27 349 illness through the initial and sustained support of vital organ functions”, aims to be inclusive.  
28  
29 350 Critical care may include the use of specialized resources, but it is not a requirement. We see this  
30  
31 351 as a strength in the definition, as it maintains a patient-centred rather than setting-dependent focus.  
32  
33 352 Critical care when defined in this way can be provided anywhere, and does not have to be resource-  
34  
35 353 intensive – it includes both high-resource care in ICUs and lower resource care in other settings.  
36  
37 354 Indeed, critical care can be provided in general wards, in small health facilities, in the community  
38  
39 355 or in ambulances. High-resource intensive care may not be possible in low-resource settings, but  
40  
41 356 such settings care for many critically ill patients who require critical care(6,31,32). The proposed  
42  
43 357 definition focuses on supporting vital organ functions, emphasising that critical care’s primary  
44  
45 358 focus is treating the critical condition of the patient rather than definitive care for the underlying  
46  
47 359 condition(9,33). Critical care, as we have defined it, can be seen as a system of care of patients  
48  
49 360 with critical illness throughout the course of their illness, from the time of their first contact with  
50  
51 361 healthcare through to resolution of the critical illness or death. Critical care is part of the wider  
52  
53 362 concept of acute care which also includes prehospital care, emergency care, trauma and surgery  
54  
55 363 care, as well as in-patient care in medical, surgical, pediatric, obstetric and other wards(30).

56  
57 364 The word “crisis” is the root for the word critical and has its origin from the Greek word “krisis”  
58  
59 365 referring to a “turning point” or “act of separation”, and later in English in a medical context when

1  
2  
3 366 a crisis refers to the decisive point at which a patient either improves or deteriorates.(34) The  
4 367 concepts critical illness and critical care could be regarded as remaining true to these origins as  
5 368 they refer to the point in a patient's "journey" through their illness where they are so severely ill  
6 369 that the situation has become a crisis, and managing the crisis is necessary to direct the patient  
7 370 towards improvement rather than towards deterioration.

### 13 371 **Strengths and Limitations**

16 372 To our knowledge, this is the first study attempting to describe the uses and definitions of the  
17 373 concepts *critical illness* and *critical care*, and to identify the defining attributes leading to proposed  
18 374 definitions of the concepts. A strength is the use of both a scoping review of the literature and the  
19 375 inclusion of over one hundred clinical experts as sources. The findings of the analysis should be  
20 376 seen as a first step towards consensus and we recognise that the use of concepts is fluid and changes  
21 377 over time (10). We were limited to including literature in English between 2008 and 2019 and to  
22 378 published studies and guidelines and we may have missed relevant publications in other languages  
23 379 or in other grey literature. Our sample of experts was purposively selected and had global  
24 380 representation but was not perfectly symmetrical to continents, specialty, cadre or gender. There  
25 381 are many more experts than we were able to include, and we are likely to have missed experts who  
26 382 could have provided valuable contributions. Our proposed definitions, while based on a content  
27 383 analysis of scoping reviews and an expert survey, are the outputs of one possible interpretation of  
28 384 the data and may not be universally accepted. We hope our analysis and findings move the  
29 385 conversation forwards, providing input about how to communicate and collaborate around these  
30 386 vitally important concepts, and ultimately how to improve the care and outcomes for critically ill  
31 387 patients.

32  
33  
34  
35  
36  
37  
38  
39  
40  
41  
42  
43  
44  
45 388

### 46 389 **Conclusion**

49 390 The concepts critical illness and critical care lack consensus definitions and are used in varied  
50 391 ways in the literature and among global experts. Through a concept analysis of scoping reviews  
51 392 and an expert survey we identify common themes in the uses and understandings of the concepts.  
52 393 We propose definitions for the concepts: "*Critical illness is a state of ill health with vital organ*  
53 394 *dysfunction, a high risk of imminent death if care is not provided and the potential for reversibility*"

1  
2  
3 395 and “*Critical care is the identification, monitoring, and treatment of patients with critical illness*  
4 396 *through the initial and sustained support of vital organ functions.*” The proposed definitions could  
5  
6 397 aid clinical practice, research, and policy making.  
7

8  
9 398 **Figure 1: Study Flowchart**

10  
11 399 **Figure 2 : The defining attributes of critical illness**

12  
13 400 **Figure 3: The defining attributes of critical care**

14  
15 401

16  
17 402

18  
19 403 **Acknowledgements:** We thank all the experts who participated in the study.  
20

21  
22 404 **Contributors:** Tim Baker & Carl Otto Schell designed the study. Raphael Kazidule  
23 405 Kayambankadzanja, Thomas Tamras, Hedi Mollazedagan and Tim Baker collected the data. Helle  
24 406 Mølsted Alvesson, Mats Holmberg, and Martin Gerdin Wärnberg contributed to analysing the data.  
25 407 RKK and TB wrote the first draft of the manuscript. All authors critically reviewed the manuscript  
26 408 and approved the final version. The corresponding author attests that all listed authors meet  
27 409 authorship criteria and that no others meeting the criteria have been omitted.  
28  
29  
30  
31  
32

33 410 **Funding:** This research received no specific grant from any funding agency in the public,  
34 411 commercial or not-for-profit sectors  
35  
36  
37

38 412 **Disclaimer:** We confirm the independence of researchers and that all authors in study can take  
39 413 responsibility for the integrity of the data and the accuracy of the data analysis.  
40  
41

42 414 **Competing Interests:** None Declared  
43

44 415 **Patient Consent for Publication:** Not required  
45

46 416 **Ethics Approval:** The Research Ethics Committee of the London School of Hygiene and Tropical  
47 417 Medicine approved the study (Reference number 22661).  
48  
49

50 418 **Provenance and Peer Review:** Not commissioned, externally reviewed  
51  
52

53 419 **Data Availability Statement:** The study data are available from the corresponding author on  
54 420 reasonable request  
55  
56  
57  
58  
59  
60

1  
2  
3 421 **Supplementary Files:** Supplementary Tables 1 and 2  
4  
5  
6 422  
7

8 423 **References**

- 9  
10 424 1. Croft P, Altman DG, Deeks JJ, Dunn KM, Hay AD, Hemingway H, et al. The science of clinical  
11 425 practice: disease diagnosis or patient prognosis? Evidence about “what is likely to happen”  
12 426 should shape clinical practice. *BMC Med.* 2015;13:20.  
13  
14 427 2. Adhikari NK, Fowler RA, Bhagwanjee S, Rubenfeld GD. Critical care and the global burden of  
15 428 critical illness in adults. *Lancet.* 2010/10/12. 2010;376(9749):1339–46.  
16  
17 429 3. Vukoja M, Riviello ED, Schultz MJ. Critical care outcomes in resource-limited settings. *Current*  
18 430 *Opinion in Critical Care.* 2018 Oct;24(5):421–7.  
19  
20 431 4. Wunsch H, Angus DC, Harrison DA, Collange O, Fowler R, Hoste EAJ, et al. Variation in critical care  
21 432 services across North America and Western Europe\*. *Critical Care Medicine.* 2008  
22 433 Oct;36(10):2787-e8.  
23  
24 434 5. Biccard BM, Gopalan PD, Miller M, Michell WL, Thomson D, Ademuyiwa A, et al. Patient care and  
25 435 clinical outcomes for patients with COVID-19 infection admitted to African high-care or intensive  
26 436 care units (ACCCOS): a multicentre, prospective, observational cohort study. *The Lancet.* 2021  
27 437 May;397(10288):1885–94.  
28  
29 438 6. Murthy S, Leligdowicz A, Adhikari NKJ. Intensive Care Unit Capacity in Low-Income Countries: A  
30 439 Systematic Review. *PLOS ONE.* 2015 Jan 24;10(1):e0116949.  
31  
32 440 7. Arabi YM, Azoulay E, Al-Dorzi HM, Phua J, Salluh J, Binnie A, et al. How the COVID-19 pandemic  
33 441 will change the future of critical care. *Intensive Care Medicine.* 2021 Mar 22;47(3):282–91.  
34  
35 442 8. Hvarfner A, Al-Djaber A, Ekström H, Enarsson M, Castegren M, Baker T, et al. Oxygen provision to  
36 443 severely ill COVID-19 patients at the peak of the 2020 pandemic in a Swedish district hospital.  
37 444 *PLoS One.* 2022/01/21. 2022;17(1):e0249984.  
38  
39 445 9. Baker T, Schell CO, Petersen DB, Sawe H, Khalid K, Mndolo S, et al. Essential care of critical illness  
40 446 must not be forgotten in the COVID-19 pandemic. *The Lancet [Internet].* 2020;395(10232):1253–  
41 447 4. Available from: [https://doi.org/10.1016/S0140-6736\(20\)30793-5](https://doi.org/10.1016/S0140-6736(20)30793-5)  
42  
43 448 10. Walker LO, Avant KC. *Strategies for Theory Construction in Nursing.* 5th Edition. Pearson; 2011.  
44  
45 449 11. Xyrichis A, Ream E. Teamwork: A concept analysis. *Journal of Advanced Nursing.* 2008  
46 450 Jan;61(2):232–41.  
47  
48 451 12. Allvin R, Berg K, Idvall E, Nilsson U. Postoperative recovery: a concept analysis. *Journal of*  
49 452 *Advanced Nursing.* 2007 Mar;57(5).  
50  
51 453 13. Rebmann T. Defining bioterrorism preparedness for nurses: concept analysis. *Journal of*  
52 454 *Advanced Nursing.* 2006 Jun;54(5).  
53  
54  
55  
56  
57  
58  
59  
60

- 1  
2  
3 455 14. Arksey H, O'Malley L. Scoping studies: towards a methodological framework. *International*  
4 456 *Journal of Social Research Methodology*. 2005 Feb;8(1).
- 6 457 15. Ouzzani M, Hammady H, Fedorowicz Z, Elmagarmid A. Rayyan—a web and mobile app for  
7 458 systematic reviews. *Systematic Reviews*. 2016 Dec 5;5(1).
- 9 459 16. Erlingsson C, Brysiewicz P. A hands-on guide to doing content analysis. *African Journal of*  
10 460 *Emergency Medicine*. 2017 Sep;7(3).
- 12 461 17. Schell CO, Castegren M, Lugazia E, Blixt J, Mulungu M, Konrad D, et al. Severely deranged vital  
13 462 signs as triggers for acute treatment modifications on an intensive care unit in a low-income  
14 463 country. *BMC Research Notes*. 2015 Dec 25;8(1).
- 16 464 18. Seymour CW, Liu VX, Iwashyna TJ, Brunkhorst FM, Rea TD, Scherag A, et al. Assessment of Clinical  
17 465 Criteria for Sepsis. *JAMA*. 2016 Feb 23;315(8).
- 19 466 19. Smith GB, Redfern OC, Pimentel MA, Gerry S, Collins GS, Malycha J, et al. The National Early  
20 467 Warning Score 2 (NEWS2). *Clinical Medicine*. 2019 May 15;19(3).
- 22 468 20. Knaus WA DEWDZJ. APACHE II: a severity of disease classification system. *Critical Care Medicine*.  
23 469 *Critical Care Medicine*. 1985;
- 26 470 21. Moreno RP, Metnitz PGH, Almeida E, Jordan B, Bauer P, Campos RA, et al. SAPS 3 - From  
27 471 evaluation of the patient to evaluation of the intensive care unit. Part 2: Development of a  
28 472 prognostic model for hospital mortality at ICU admission. *Intensive Care Medicine*.  
29 473 2005;31(10):1345–55.
- 31 474 22. Marshall JC, Bosco L, Adhikari NK, Connolly B, Diaz J v., Dorman T, et al. What is an intensive care  
32 475 unit? A report of the task force of the World Federation of Societies of Intensive and Critical Care  
33 476 Medicine. *Journal of Critical Care*. 2017 Feb;37:270–6.
- 35 477 23. Schell CO, Khalid K, Wharton-Smith A, Oliwa J, Sawe HR, Roy N, et al. Essential Emergency and  
36 478 Critical Care: a consensus among global clinical experts. *BMJ Global Health*. 2021 Sep 21;6(9).
- 38 479 24. Maharaj R, Raffaele I, Wendon J. Rapid response systems: a systematic review and meta-analysis.  
39 480 2015;
- 41 481 25. Chandrashekar M, Shivaraj BM, Krishna VP. A study on prognostic value of serum cortisol in  
42 482 determining the outcome in the critically ill patients. *Journal of Evolution of Medical and Dental*  
43 483 *Sciences*. 2015 Jul 17;4(58).
- 45 484 26. Painter JR. Critical Care in the Surgical Global Period. *Chest*. 2013 Mar;143(3).
- 47 485 27. Sallnow L, Smith R, Ahmedzai SH, Bhadelia A, Chamberlain C, Cong Y, et al. Report of the Lancet  
48 486 Commission on the Value of Death: bringing death back into life. *The Lancet* [Internet].  
49 487 2022;399(10327):837–84. Available from: [https://doi.org/10.1016/S0140-6736\(21\)02314-X](https://doi.org/10.1016/S0140-6736(21)02314-X)
- 51 488 28. Biccand BM, Gopalan PD, Miller M, Michell WL, Thomson D, Ademuyiwa A, et al. Patient care and  
52 489 clinical outcomes for patients with COVID-19 infection admitted to African high-care or intensive  
53 490 care units (ACCCOS): a multicentre, prospective, observational cohort study. *The Lancet*



- 1  
2  
3 491 [Internet]. 2021;397(10288):1885–94. Available from: <https://doi.org/10.1016/S0140->  
4 492 6736(21)00441-4  
5  
6 493 29. Joint Faculty of Intensive Care Medicine of Ireland. National Standards for Adult Critical Care  
7 494 Services 2011. 2011.  
8  
9 495 30. Hirshon JM, Risko N, Calvello EJ, Stewart de Ramirez S, Narayan M, Theodosios C, et al. Health  
10 496 systems and services: the role of acute care. Bull World Health Organ. 2013/05/17.  
11 497 2013;91(5):386–8.  
12  
13 498 31. Prin M, Wunsch H. International comparisons of intensive care. Current Opinion in Critical Care.  
14 499 2012 Dec;18(6):700–6.  
15  
16 500 32. Manda-Taylor L, Mndolo S, Baker T. Critical care in Malawi: The ethics of beneficence and justice.  
17 501 Malawi Medical Journal. 2017 Nov 24;29(3):268.  
18  
19 502 33. Schell CO, Gerdin Wärnberg M, Hvarfner A, Höög A, Baker U, Castegren M, et al. The global need  
20 503 for essential emergency and critical care. Vol. 22, Critical Care. BioMed Central Ltd.; 2018.  
21  
22 504 34. Merriam-Webster. Merriam Webster Dictionary [Internet]. 2022 [cited 2022 Apr 11]. Available  
23 505 from: <https://www.merriam-webster.com/dictionary/crisis>  
24  
25  
26 506  
27  
28  
29  
30  
31  
32  
33  
34  
35  
36  
37  
38  
39  
40  
41  
42  
43  
44  
45  
46  
47  
48  
49  
50  
51  
52  
53  
54  
55  
56  
57  
58  
59  
60

Figure 1: Study Flowchart



1  
2  
3  
4  
5  
6  
7  
8  
9  
10  
11  
12  
13  
14  
15  
16  
17  
18  
19  
20  
21  
22  
23  
24  
25  
26  
27  
28  
29  
30  
31  
32  
33  
34  
35  
36  
37  
38  
39  
40  
41  
42  
43  
44  
45  
46  
47  
48  
49  
50  
51  
52  
53  
54  
55  
56  
57  
58  
59  
60

For peer review only

1  
2  
3 **Figure 2: The defining attributes of critical illness**  
4

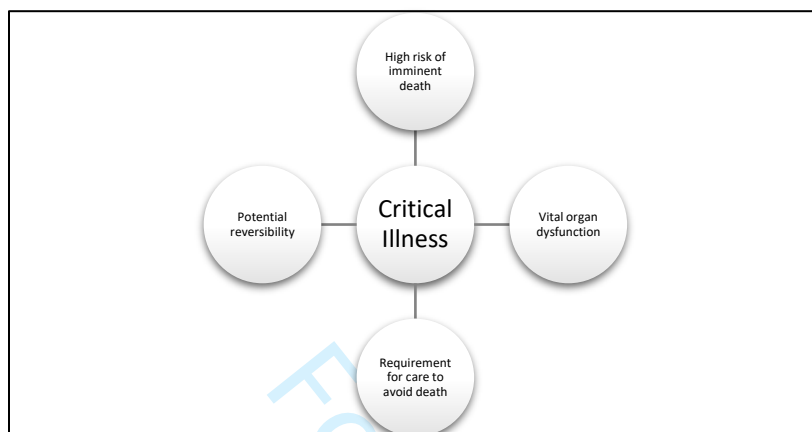

1  
2  
3  
4  
5  
6  
7  
8  
9  
10  
11  
12  
13  
14  
15  
16  
17  
18  
19  
20  
21  
22  
23  
24  
25  
26  
27  
28  
29  
30  
31  
32  
33  
34  
35  
36  
37  
38  
39  
40  
41  
42  
43  
44  
45  
46  
47  
48  
49  
50  
51  
52  
53  
54  
55  
56  
57  
58  
59  
60

**Figure 3: The defining attributes of critical care**

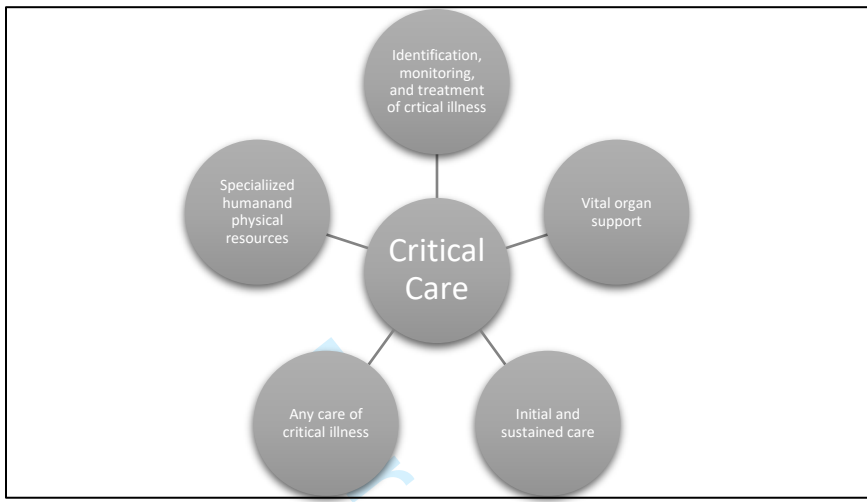

peer review only

**Supplementary Table 1 Literature with definitions of critical illness**

|   | <b>First Author and Publication Date</b> | <b>Country</b> | <b>Reference</b>                                                                                                                                                                                                                              |
|---|------------------------------------------|----------------|-----------------------------------------------------------------------------------------------------------------------------------------------------------------------------------------------------------------------------------------------|
| 1 | Kievlan 2016                             | United States  | Kievlan DR, Martin-Gill C, Kahn JM, Callaway CW, Yealy DM, Angus DC, et al. External validation of a prehospital risk score for critical illness. <i>Crit Care</i> . 2016;20(1):255.                                                          |
| 2 | Warttig 2018                             | United Kingdom | Warttig S, Alderson P, Evans DJW, Lewis SR, Kourbeti IS, Smith AF. Automated monitoring compared to standard care for the early detection of sepsis in critically ill patients (Review). <i>Cochrane Database of Syst Rev</i> . 2018(6):28.   |
| 3 | Rodriguez 2018                           | United States  | Rodriguez RM, Greenwood JC, Nuckton TJ, Darger B, Shofer FS, Troeger D, et al. Comparison of qSOFA with current emergency department tools for screening of patients with sepsis for critical illness. <i>Emerg Med J</i> . 2018;35(6):350-6. |
| 4 | Benneyworth 2015                         | United States  | Benneyworth BD, Bennett WE, Carroll AE. Cross-sectional comparison of critically ill pediatric patients across hospitals with various levels of pediatric care. <i>BMC Res Notes</i> . 2015;8:693.                                            |
| 5 | Hsu 2016                                 | Taiwan         | Hsu CW, Lin CS, Chen SJ, Lin SH, Lin CL, Kao CH. Risk of type 2 diabetes mellitus in patients with acute critical illness: a population-based cohort study. <i>Intensive Care Med</i> . 2016;42(1):38-45.                                     |
| 6 | Painter 2013                             | United States  | Painter JR. Critical Care in the Surgical Global Period. <i>Chest</i> . 2013;143(3):851-5.                                                                                                                                                    |
| 7 | Chandrashekar 2015                       | India          | Chandrashekar M, Shivaraj BM, Krishna VP. A study on prognostic value of serum cortisol in determining the outcome in the critically ill patients. <i>JEMDS</i> . 2015;4(58):10130-5.                                                         |
| 8 | Liao 2014                                | United States  | Liao MM, Lezotte D, Lowenstein SR, Howard K, Finley Z, Feng ZP, et al. Sensitivity of systemic inflammatory response syndrome for critical illness among ED patients. <i>Am J of Emerg Med</i> . 2014;32(11):1319-25.                         |
| 9 | Valentin 2011                            | 23 countries   | Valentin A, Ferdinande P, Improvem EWGQ. Recommendations on basic requirements for intensive care units: structural and organizational aspects. <i>Intensive Care Med</i> . 2011;37(10):1575-87.                                              |

1  
2  
3  
4  
5  
6  
7  
8  
9  
10  
11  
12  
13  
14  
15  
16  
17  
18  
19  
20  
21  
22  
23  
24  
25  
26  
27  
28  
29  
30  
31  
32  
33  
34  
35  
36  
37  
38  
39  
40  
41  
42  
43  
44  
45  
46

For peer review only

Supplementary Table 2 Literature with definitions of critical care

|    | First Author and Publication Date                                                              | Country                                    | Reference                                                                                                                                                                                                                                                               |
|----|------------------------------------------------------------------------------------------------|--------------------------------------------|-------------------------------------------------------------------------------------------------------------------------------------------------------------------------------------------------------------------------------------------------------------------------|
| 1  | Wunsch 2008                                                                                    | United States, France, UK, Canada, Belgium | Wunsch H, Angus DC, Harrison DA, Collange O, Fowler R, Hoste EA, et al. Variation in critical care services across North America and Western Europe. <i>Crit Care Med.</i> 2008;36(10):2787-93, e1-9                                                                    |
| 2  | Prin 2012                                                                                      | United States                              | Prin M, Wunsch H. International comparisons of intensive care: informing outcomes and improving standards. <i>Curr Opin Crit Care.</i> 2012;18(6):700-6                                                                                                                 |
| 3  | Painter 2013                                                                                   | United States                              | Painter JR. Critical care in the surgical global period. <i>Chest.</i> 2013;143(3):851-5                                                                                                                                                                                |
| 4  | Royal College of Anaesthetists 2018                                                            | England                                    | <a href="https://www.rcoa.ac.uk/sites/default/files/documents/2020-06/EMC-Guidelines2018.pdf">https://www.rcoa.ac.uk/sites/default/files/documents/2020-06/EMC-Guidelines2018.pdf</a>                                                                                   |
| 5  | Joint Faculty of Intensive Care Medicine of Ireland and Intensive Care Society of Ireland 2019 | Ireland                                    | <a href="https://jficmi.anaesthesia.ie/wp-content/uploads/2019/09/National-Standards-for-Adult-Critical-Services-2019.pdf">https://jficmi.anaesthesia.ie/wp-content/uploads/2019/09/National-Standards-for-Adult-Critical-Services-2019.pdf</a>                         |
| 6  | Marshall 2017                                                                                  | Many countries                             | Marshall JC, Bosco L, Adhikari NK, Connolly B, Diaz J v., Dorman T, et al. What is an intensive care unit? A report of the task force of the World Federation of Societies of Intensive and Critical Care Medicine. <i>Journal of Critical Care.</i> 2017 Feb;37:270–6. |
| 7  | The International Surgical Outcomes Study 2016                                                 | Many countries                             | International Surgical Outcomes Study g. Global patient outcomes after elective surgery: prospective cohort study in 27 low-, middle- and high-income countries. <i>Br J Anaesth.</i> 2016;117(5):601-9                                                                 |
| 8  | Benneyworth 2015                                                                               | United States                              | Benneyworth BD, Bennett WE, Carroll AE. Cross-sectional comparison of critically ill pediatric patients across hospitals with various levels of pediatric care. <i>BMC Res Notes.</i> 2015;8:693.                                                                       |
| 9  | Kievlan 2016                                                                                   | United States                              | Kievlan DR, Martin-Gill C, Kahn JM, Callaway CW, Yealy DM, Angus DC, et al. External validation of a prehospital risk score for critical illness. <i>Crit Care.</i> 2016;20(1):255.                                                                                     |
| 10 | Boyle 2008                                                                                     | Australia                                  | Boyle M, Butcher R, Conyers V, Kendrick T, MacNamara M, Lang S. Transition to intensive care nursing: establishing a starting point. <i>Aust Crit Care.</i> 2008;21(4):190-8.                                                                                           |
| 11 | Hirshon 2013                                                                                   | United States                              | Hirshon JM, Risko N, Calvillo EJ, Stewart de Ramirez S, Narayan M, Theodosis C, et al. Health systems and services: the role of acute care. <i>Bull World Health Organ.</i> 2013;91(5):386-8                                                                            |
| 12 | McCarthy 2013                                                                                  | United States                              | McCarthy C, O'Rourke NC, Madison JM. Integrating advanced practice providers into medical critical care teams. <i>Chest.</i> 2013;143(3):847-50                                                                                                                         |
| 13 | Intensive Care Society 2009                                                                    | United Kingdom                             | <a href="https://icmwk.com/wp-content/uploads/2014/02/Revised-Levels-of-Care-21-12-09.pdf">https://icmwk.com/wp-content/uploads/2014/02/Revised-Levels-of-Care-21-12-09.pdf</a>                                                                                         |



## Towards Definitions of Critical Care and Critical Illness: A Concept Analysis

| Section Item              | PRISMA-ScR Checklist Item                                                                                                                                                                                                                                                 | Page |
|---------------------------|---------------------------------------------------------------------------------------------------------------------------------------------------------------------------------------------------------------------------------------------------------------------------|------|
| <b>Title</b>              | Identify the report as a scoping review.                                                                                                                                                                                                                                  | -    |
| <b>Abstract</b>           |                                                                                                                                                                                                                                                                           |      |
| Structured summary        | Provide a structured summary that includes (as applicable) background, objectives, eligibility criteria, sources of evidence, charting methods, results, and conclusions that relate to the review questions and objectives.                                              | 1    |
| <b>Introduction</b>       |                                                                                                                                                                                                                                                                           |      |
| Rationale                 | Describe the rationale for the review in the context of what is already known. Explain why the review questions/objectives lend themselves to a scoping review approach.                                                                                                  | 3-4  |
| Objectives                | Provide an explicit statement of the questions and objectives being addressed with reference to their key elements (e.g., population or participants, concepts, and context) or other relevant key elements used to conceptualize the review questions and/or objectives. | 4    |
| <b>Methods</b>            |                                                                                                                                                                                                                                                                           |      |
| Protocol and registration | Indicate whether a review protocol exists; state if and where it can be accessed (e.g., a Web address); and if available, provide registration information, including the registration number.                                                                            | 5    |
| Eligibility criteria      | Specify characteristics of the sources of evidence used as eligibility criteria (e.g.,                                                                                                                                                                                    | 5    |

|                                                      |                                                                                                                                                                                                                                                                                                            |          |
|------------------------------------------------------|------------------------------------------------------------------------------------------------------------------------------------------------------------------------------------------------------------------------------------------------------------------------------------------------------------|----------|
|                                                      | years considered, language, and publication status), and provide a rationale.                                                                                                                                                                                                                              |          |
| 6 Information sources                                | Describe all information sources in the search (e.g., databases with dates of coverage and contact with authors to identify additional sources), as well as the date the most recent search was executed                                                                                                   | 5        |
| Search                                               | Present the full electronic search strategy for at least 1 database, including any limits used, such that it could be repeated.                                                                                                                                                                            | 5        |
| Selection of sources of evidence                     | State the process for selecting sources of evidence (i.e., screening and eligibility) included in the scoping review.                                                                                                                                                                                      | 5        |
| Data charting process                                | Describe the methods of charting data from the included sources of evidence (e.g., calibrated forms or forms that have been tested by the team before their use, and whether data charting was done independently or in duplicate) and any processes for obtaining and confirming data from investigators. | 7        |
| Data items                                           | List and define all variables for which data were sought and any assumptions and simplifications made.                                                                                                                                                                                                     | 5        |
| Critical appraisal of individual sources of evidence | If done, provide a rationale for conducting a critical appraisal of included sources of evidence; describe the methods used and how this information was used in any data synthesis (if appropriate).                                                                                                      | Not Done |
| Summary measures                                     | Not applicable for scoping reviews                                                                                                                                                                                                                                                                         | N/A      |

|                                               |                                                                                                                                                                                                 |          |
|-----------------------------------------------|-------------------------------------------------------------------------------------------------------------------------------------------------------------------------------------------------|----------|
| Synthesis of results                          | Describe the methods of handling and summarizing the data that were charted.                                                                                                                    | 7        |
| Risk of bias across studies                   | Not applicable for scoping reviews                                                                                                                                                              | N/A      |
| Additional analyses                           | Not applicable for scoping reviews.                                                                                                                                                             | N/A      |
| <b>Results</b>                                |                                                                                                                                                                                                 |          |
| Selection of sources of evidence              | Give numbers of sources of evidence screened, assessed for eligibility, and included in the review, with reasons for exclusions at each stage, ideally using a flow diagram.                    | 5-7      |
| Characteristics of sources of evidence        | For each source of evidence, present characteristics for which data were charted and provide the citations.                                                                                     | 9-13     |
| Critical appraisal within sources of evidence | If done, present data on critical appraisal of included sources of evidence (see item 12).                                                                                                      | Not Done |
| Results of individual sources of evidence     | For each included source of evidence, present the relevant data that were charted that relate to the review questions and objectives.                                                           | 9-13     |
| Synthesis of results                          | Summarize and/or present the charting results as they relate to the review questions and objectives.                                                                                            | 9-13     |
| Risk of bias across studies                   | Not applicable for scoping reviews.                                                                                                                                                             | N/A      |
| Additional analyses                           | Not applicable for scoping reviews.                                                                                                                                                             | N/A      |
| <b>Discussion</b>                             |                                                                                                                                                                                                 |          |
| Summary of evidence                           | Summarize the main results (including an overview of concepts, themes, and types of evidence available), link to the review questions and objectives, and consider the relevance to key groups. | 14-17    |

|                                              |                |                                                                                                                                                                                 |    |
|----------------------------------------------|----------------|---------------------------------------------------------------------------------------------------------------------------------------------------------------------------------|----|
| 1<br>2<br>3<br>4<br>5<br>6                   | Limitations    | Discuss the limitations of the scoping review process.                                                                                                                          | 17 |
| 7<br>8<br>9<br>10<br>11<br>12                | Conclusions    | Provide a general interpretation of the results with respect to the review questions and objectives, as well as potential implications and/or next steps.                       | 17 |
| 13<br>14<br>15<br>16<br>17<br>18<br>19<br>20 | <b>Funding</b> | Describe sources of funding for the included sources of evidence, as well as sources of funding for the scoping review. Describe the role of the funders of the scoping review. | 18 |
