# Supplementary material for: Towards definitions of critical illness and critical care using concept analysis
Source: PubMed Central journal article supplement — BMJ Open. 2022 Sep 5;12(9):e060972. doi: 10.1136/bmjopen-2022-060972 (PMC9445819; doi:10.1136/bmjopen-2022-060972), 2022-09-05
Supplement: bmjopen-2022-060972supp001.pdf [file bmjopen-2022-060972supp001.pdf]

**Supplementary Table 1 Literature with definitions of critical illness**

|   | First Author and Publication Date | Country        | Reference                                                                                                                                                                                                                                     |
|---|-----------------------------------|----------------|-----------------------------------------------------------------------------------------------------------------------------------------------------------------------------------------------------------------------------------------------|
| 1 | Kievlan 2016                      | United States  | Kievlan DR, Martin-Gill C, Kahn JM, Callaway CW, Yealy DM, Angus DC, et al. External validation of a prehospital risk score for critical illness. <i>Crit Care</i> . 2016;20(1):255.                                                          |
| 2 | Warttig 2018                      | United Kingdom | Warttig S, Alderson P, Evans DJW, Lewis SR, Kourbeti IS, Smith AF. Automated monitoring compared to standard care for the early detection of sepsis in critically ill patients (Review). <i>Cochrane Database of Syst Rev</i> . 2018(6):28.   |
| 3 | Rodriguez 2018                    | United States  | Rodriguez RM, Greenwood JC, Nuckton TJ, Darger B, Shofer FS, Troeger D, et al. Comparison of qSOFA with current emergency department tools for screening of patients with sepsis for critical illness. <i>Emerg Med J</i> . 2018;35(6):350-6. |
| 4 | Benneyworth 2015                  | United States  | Benneyworth BD, Bennett WE, Carroll AE. Cross-sectional comparison of critically ill pediatric patients across hospitals with various levels of pediatric care. <i>BMC Res Notes</i> . 2015;8:693.                                            |
| 5 | Hsu 2016                          | Taiwan         | Hsu CW, Lin CS, Chen SJ, Lin SH, Lin CL, Kao CH. Risk of type 2 diabetes mellitus in patients with acute critical illness: a population-based cohort study. <i>Intensive Care Med</i> . 2016;42(1):38-45.                                     |
| 6 | Painter 2013                      | United States  | Painter JR. Critical Care in the Surgical Global Period. <i>Chest</i> . 2013;143(3):851-5.                                                                                                                                                    |
| 7 | Chandrashekar 2015                | India          | Chandrashekar M, Shivaraj BM, Krishna VP. A study on prognostic value of serum cortisol in determining the outcome in the critically ill patients. <i>JEMDS</i> . 2015;4(58):10130-5.                                                         |
| 8 | Liao 2014                         | United States  | Liao MM, Lezotte D, Lowenstein SR, Howard K, Finley Z, Feng ZP, et al. Sensitivity of systemic inflammatory response syndrome for critical illness among ED patients. <i>Am J of Emerg Med</i> . 2014;32(11):1319-25.                         |
| 9 | Valentin 2011                     | 23 countries   | Valentin A, Ferdinande P, Improvem EWGQ. Recommendations on basic requirements for intensive care units: structural and organizational aspects. <i>Intensive Care Med</i> . 2011;37(10):1575-87.                                              |
