# Supplementary material for: Towards definitions of critical illness and critical care using concept analysis
Source: PubMed Central journal article supplement — BMJ Open. 2022 Sep 5;12(9):e060972. doi: 10.1136/bmjopen-2022-060972 (PMC9445819; doi:10.1136/bmjopen-2022-060972), 2022-09-05
Supplement: bmjopen-2022-060972supp002.pdf [file bmjopen-2022-060972supp002.pdf]

**Supplementary Table 2 Literature with definitions of critical care**

|    | First Author and Publication Date                                                              | Country                                    | Reference                                                                                                                                                                                                                                                                |
|----|------------------------------------------------------------------------------------------------|--------------------------------------------|--------------------------------------------------------------------------------------------------------------------------------------------------------------------------------------------------------------------------------------------------------------------------|
| 1  | Wunsch 2008                                                                                    | United States, France, UK, Canada, Belgium | Wunsch H, Angus DC, Harrison DA, Collange O, Fowler R, Hoste EA, et al. Variation in critical care services across North America and Western Europe. <i>Crit Care Med</i> . 2008;36(10):2787-93, e1-9                                                                    |
| 2  | Prin 2012                                                                                      | United States                              | Prin M, Wunsch H. International comparisons of intensive care: informing outcomes and improving standards. <i>Curr Opin Crit Care</i> . 2012;18(6):700-6                                                                                                                 |
| 3  | Painter 2013                                                                                   | United States                              | Painter JR. Critical care in the surgical global period. <i>Chest</i> . 2013;143(3):851-5                                                                                                                                                                                |
| 4  | Royal College of Anaesthetists 2018                                                            | England                                    | <a href="https://www.rcoa.ac.uk/sites/default/files/documents/2020-06/EMC-Guidelines2018.pdf">https://www.rcoa.ac.uk/sites/default/files/documents/2020-06/EMC-Guidelines2018.pdf</a>                                                                                    |
| 5  | Joint Faculty of Intensive Care Medicine of Ireland and Intensive Care Society of Ireland 2019 | Ireland                                    | <a href="https://jficmi.anaesthesia.ie/wp-content/uploads/2019/09/National-Standards-for-Adult-Critical-Services-2019.pdf">https://jficmi.anaesthesia.ie/wp-content/uploads/2019/09/National-Standards-for-Adult-Critical-Services-2019.pdf</a>                          |
| 6  | Marshall 2017                                                                                  | Many countries                             | Marshall JC, Bosco L, Adhikari NK, Connolly B, Diaz J v., Dorman T, et al. What is an intensive care unit? A report of the task force of the World Federation of Societies of Intensive and Critical Care Medicine. <i>Journal of Critical Care</i> . 2017 Feb;37:270–6. |
| 7  | The International Surgical Outcomes Study 2016                                                 | Many countries                             | International Surgical Outcomes Study g. Global patient outcomes after elective surgery: prospective cohort study in 27 low-, middle- and high-income countries. <i>Br J Anaesth</i> . 2016;117(5):601-9                                                                 |
| 8  | Benneyworth 2015                                                                               | United States                              | Benneyworth BD, Bennett WE, Carroll AE. Cross-sectional comparison of critically ill pediatric patients across hospitals with various levels of pediatric care. <i>BMC Res Notes</i> . 2015;8:693.                                                                       |
| 9  | Kievlan 2016                                                                                   | United States                              | Kievlan DR, Martin-Gill C, Kahn JM, Callaway CW, Yealy DM, Angus DC, et al. External validation of a prehospital risk score for critical illness. <i>Crit Care</i> . 2016;20(1):255.                                                                                     |
| 10 | Boyle 2008                                                                                     | Australia                                  | Boyle M, Butcher R, Conyers V, Kendrick T, MacNamara M, Lang S. Transition to intensive care nursing: establishing a starting point. <i>Aust Crit Care</i> . 2008;21(4):190-8.                                                                                           |
| 11 | Hirshon 2013                                                                                   | United States                              | Hirshon JM, Risko N, Calvillo EJ, Stewart de Ramirez S, Narayan M, Theodosios C, et al. Health systems and services: the role of acute care. <i>Bull World Health Organ</i> . 2013;91(5):386-8                                                                           |
| 12 | McCarthy 2013                                                                                  | United States                              | McCarthy C, O'Rourke NC, Madison JM. Integrating advanced practice providers into medical critical care teams. <i>Chest</i> . 2013;143(3):847-50                                                                                                                         |
| 13 | Intensive Care Society 2009                                                                    | United Kingdom                             | <a href="https://icmwk.com/wp-content/uploads/2014/02/Revised-Levels-of-Care-21-12-09.pdf">https://icmwk.com/wp-content/uploads/2014/02/Revised-Levels-of-Care-21-12-09.pdf</a>                                                                                          |
